# Supplementary material for: CCR1 mediates Müller cell activation and photoreceptor cell death in macular and retinal degeneration
Source: eLife. 2023 Oct 30;12:e81208. doi: 10.7554/eLife.81208 (PMC10615370; doi:10.7554/eLife.81208)
Supplement: Figure 1—figure supplement 1—source data 1. [file elife-81208-fig1-figsupp1-data1.xlsx]

## Sheet: AMD vs Healthy Monocytes erg 
Rigth eye			0.0006	0.0025	0.01	0.04	0.16	0.63	2.5	10		Left eyes			0.0006	0.0025	0.01	0.04	0.16	0.63	2.5	10
Healthy 1				178		212		332		294		AMD 1				170		236		352		393
Healthy 2				43		60		86		203		AMD 2				144		313		283		332
AMD3			162	283	266	340	330	311	346	273		Healthy 3			122	208	255	292	264	249	269	241
AMD4			219	294	334	299	338	355	306	267		Healthy 4			224	330	356	323	351	344	289	246
Healthy 5			127	206	199	175	196		163	167		AMD 5			152	260	253	255	258		210	215
Healthy 6			60	248	208	237	200	209	179	175		AMD 6			105	291	290	333	318	311	270	269
Healthy 7			156	208	154	160	173	205	213	168		AMD 7			178	251	218	236	248	280	255	220
Healthy 8				259	290	249	306	318	295	306		AMD 8				290	313	301	360	374	347	351
AMD 9			50	222	222	299	318	326	276	260		Healthy 9			71	225	207	246	275	273	232	217
Relative b-wave of mice exposed to photic injury and injected with healthy and AMD monocytes in each eyes												Relative b-wave of control mice - not exposed to photic injury
	0.0006	0.0025	0.01	0.04	0.16	0.63	2.5	10					0.0006	0.0025	0.01	0.04	0.16	0.63	2.5	10
	0.955056		1.11321		1.06024		1.33673						0.935252	0.954048	0.97619	0.906459	0.897025	0.87931	0.899396	0.906318
	3.34884		5.21667		3.2907		1.63547						0.839286	0.851406	1	0.968944	0.935135	1.06373	1.02064	1.07487
	1.32787	1.36058	1.04314	1.16438	1.25	1.249	1.28625	1.13278					0.790361	0.709278	0.873894	0.797414	0.829736	0.872984	0.907298	0.889381
	0.977679	0.890909	0.938202	0.925697	0.962963	1.03198	1.05882	1.08537					1.22266	1.20606	1.20325	1.16046	1.17113	1.19361	1.13636	1.14231
	1.19685	1.26214	1.27136	1.45714	1.31633		1.28834	1.28743					0.84399	0.880096	0.934959	0.873085	0.870403	0.923841	0.893382	0.918699
	1.75	1.17339	1.39423	1.40506	1.59	1.48804	1.50838	1.53714					1.06272	1.14441	1.12857	1.05978	1.05336	1.06729	1.07335	1.08182
	1.14103	1.20673	1.41558	1.475	1.43353	1.36585	1.19718	1.30952					1.03284	0.925214	0.983092	0.995381	0.949393	0.935698	0.949333	_
		1.11969	1.07931	1.20884	1.17647	1.1761	1.17627	1.14706					0.764479	0.746032	0.73639	0.745928	0.728659	0.766067	0.748649	0.913793
	0.704225	0.986667	1.07246	1.21545	1.15636	1.19414	1.18966	1.19816					0.869474	_	0.843621	0.925403	_	0.837713	0.867925	0.868687
average	1.42519	1.14287	1.61602	1.26451	1.47073	1.25085	1.29746	1.24249				average	0.929006	0.927069	0.964441	0.936984	0.929356	0.948915	0.944038	0.974484
stdv	0.835751	0.160754	1.36	0.196424	0.708184	0.158869	0.178115	0.153368				stdv	0.150018	0.174824	0.142035	0.127761	0.135749	0.134296	0.116986	0.106663
error+	3.0967	1.46438	4.33602	1.65736	2.8871	1.56859	1.65369	1.54923				error	1.22904	1.27672	1.24851	1.19251	1.20085	1.21751	1.17801	1.18781
Legend
Relative ERG b-wave amplitude versus light flash intensity of mice injected with monocytes from AMD patients (n=9) and with monocytes from age-matched controls compared with mice that were not exposed to light (n=9). Suppressed b-wave amplitude was observed in the eyes injected with monocytes from age-matched controls (Student’s t-test).
	signify over 2stdv
	signify bad ERG recording

## Sheet: AMD vs control erg results
	0.0006	0.0025	0.01	0.04	0.16	0.63	2.5	10
monocyte	1.25691	1.16345	0.891758	1.17341	1.31675	1.04532	1.00009	1.05613
	0.944954	0.835294	1.06471	0.934783	0.837963	0.785311	0.863636	0.783784
	2.00991	1.85276	1.72428	1.73649	1.80781	1.87332	1.93262	1.99012
	0.928132	1.03949	1.09877	1.04225	1.03301	1.06645	0.901016	0.970277
	2.17857	1.4	1.29268	1.04054	_	1.22222	1.65116	1.45714
	1.54265	1.46055	1.21311	1.48667	1.46239	1.44858	1.60634	1.38158
	2.93904	1.83951	2.33525	5.58978	1.94135	3.00689	1.52549	2.31445
average	1.68574	1.37015	1.37437	1.8577	1.39988	1.49258	1.35434	1.42193
stdv	0.735508	0.387386	0.497187	1.67001	0.429129	0.75222	0.425656	0.557873
error	3.15675	2.14492	2.36874	5.19771	2.25814	2.99702	2.20565	2.53767
	0.0006	0.0025	0.01	0.04	0.16	0.63	2.5	10
control	0.935252	0.954048	0.97619	0.906459	0.897025	0.87931	0.899396	0.906318
	0.839286	0.851406	1	0.968944	0.935135	1.06373	1.02064	1.07487
	0.790361	0.709278	0.873894	0.797414	0.829736	0.872984	0.907298	0.889381
	1.22266	1.20606	1.20325	1.16046	1.17113	1.19361	1.13636	1.14231
	0.84399	0.880096	0.934959	0.873085	0.870403	0.923841	0.893382	0.918699
	1.06272	1.14441	1.12857	1.05978	1.05336	1.06729	1.07335	1.08182
	1.03284	0.925214	0.983092	0.995381	0.949393	0.935698	0.949333	_
	0.764479	0.746032	0.73639	0.745928	0.728659	0.766067	0.748649	0.913793
	0.869474	_	0.843621	0.925403	_	0.837713	0.867925	0.868687
average	0.929006	0.927069	0.964441	0.936984	0.929356	0.948915	0.944038	0.974484
stdv	0.150018	0.174824	0.142035	0.127761	0.135749	0.134296	0.116986	0.106663
error	1.22904	1.27672	1.24851	1.19251	1.20085	1.21751	1.17801	1.18781
	signify over 2stdv
	signify bad ERG recording
	Legend
	Relative ERG b-wave amplitude versus light flash intensity of mice injected with monocytes (n=7) and control mice that were not exposed to light (n=9). Suppressed b-wave amplitude was observed in the eyes injected with monocytes (Student’s t-test).

## Sheet: AMD vs Control -ONL thickness
monocyte		2100	1800	1500	1200	900	600	300	0	0	0	300	600	900	1200	1500	1800	2100
				1.125	1.36111	1.25	1.2	1.08333	1.375	0	1.375	1.625	0.7	1.24242	1.17033	1.05944	1.125	1.10417
			0.8	1	1.5	1.2	1	1	1	0	1	1	1.2	1.14286	1.11111		0.9
		1.16667	0.821429	1.0875	0.911111	1.58333	1.33333	1.025	1.2	0	1.2	1.3	1.25	1.0375	1.05	0.959091	1.23182
			0.642857	1.23611	1.25	1.33333	1.25	1	1	0	1	1	0.988095	0.8125	1.2	0.85	1.1	1
		0.636364	1.125	1.6	1.33333	1.5	2		1	0	1	0.75	0.5	0.75	0.555556	0.6	0.9	0.888889
			1	1.33333	1.28571	1	1	1.33333	1	0	1	0.666667	0.833333	1	0.888889	1.11111
			1.025	1.15	0.875	1.25	1.04	1.125	1	0	1	1.85	1.1665	1.0175	1.42	1.11	1
average		0.901515	0.902381	1.21885	1.21661	1.30238	1.26048	1.09444	1.08214	0	1.08214	1.17024	0.948276	1.0004	1.05656	0.948274	1.0428	0.997685
stdv		0.374981	0.178052	0.198904	0.234781	0.194229	0.351254	0.127112	0.149104	0	0.149104	0.442318	0.28267	0.172504	0.273174	0.19804	0.132945	0.107658
error			1.25848	1.61666	1.68617	1.69084	1.96298	1.34867	1.38035	0	1.38035	2.05487	1.51362	1.3454	1.6029	1.34435	1.30869	1.213
control		2100	1800	1500	1200	900	600	300	0	0	0	300	600	900	1200	1500	1800	2100
			1.16667	1.07692	0.916667	0.916667	1	0.909091	1.5	0	1.5	0.916667	1.09091	1.07692	1	1.17647	0.75
		1.13333	0.764706	1.06667	1.25	0.928571	0.777778	0.809524	2.5	0	2.5	0.647059	1	1	1.35714	0.875	1.38462	2.14286
				0.846154	0.769231	0.846154	0.769231	0.916667	1	0	1	0.923077	0.928571	0.857143	1	0.6875	1	1.45455
				1	0.916667	0.909091	1	1	1	0	1	0.846154	1.18182	1.07692	0.916667	0.785714
				1.375	0.85	1.2	1	1.5	1	0	1	1	1.6	1.3	1	0.8	1.18	1.33
		0.818182	0.833333	1.4	1.16667	1	0.923077	0.75	1	0	1	1.26	1.52941	1.5	1.21429	0.928571	1.11111	1.2
		1.42857	0.833333	1.09091	1	0.909091	0.846154	0.909091	1	0	1	1	0.916667	1.2
			0.909091	0.866667		0.52381	0.6875	1.25	1	0	1	0.888889	0.8125	1.25		0.586207	0.6
		1.5	0.833333	0.833333	1.09091	0.846154	0.785714	0.846154	1	0	1	0.928571	0.75	0.857143	1.16667	1.07692	1
				1.18182	1	1	1	1.1	1	0	1	1	1	0.916667	1.2
average		1.22002	0.890077	1.07375	0.995571	0.907954	0.878945	0.999053	1.2	0	1.2	0.941042	1.08099	1.10348	1.10685	0.864548	1.00368	1.53185
stdv		0.311379	0.142997	0.201975	0.153301	0.169294	0.11984	0.228136	0.483046	0	0.483046	0.153255	0.283962	0.209501	0.149697	0.194866	0.263021	0.420386
error+		1.84278	1.17607	1.4777	1.30217	1.24654	1.11863	1.45532	2.16609	0	2.16609	1.24755	1.64891	1.52248	1.40624	1.25428	1.52972	2.37262
	signify over 2stdv
			Legend
			A reduced number of photoreceptor nuclei was found in eyes injected with monocytes from AMD patients at different distances from the ONH
