# Supplementary material for: CCR1 mediates Müller cell activation and photoreceptor cell death in macular and retinal degeneration
Source: eLife. 2023 Oct 30;12:e81208. doi: 10.7554/eLife.81208 (PMC10615370; doi:10.7554/eLife.81208)
Supplement: Figure 1—source data 1. [file elife-81208-fig1-data1.xlsx]

## Sheet: qPCR CXCL10
Target Name	Well	Sample Name		Cт	Cт Mean	ΔCт	ΔΔCT	2^(-ΔΔCT)									m0	m1	m2a	m2c
CXCL10	Unkn-01	1		35.9271	36.1754	12.947	0.946963	0.518723	GAPDH	M0 6287	1		23.198	23.2284			0.518723	217.562	19.4052	0.274143
CXCL10	Unkn-01	1		36.3625	36.1754												15.7842	611.427	0.590949	68.6852
CXCL10	Unkn-01	1		36.2365	36.1754												51.1658	926.469	3.70213	49.487
CXCL10	Unkn-02	2		27.6174	27.9426	4.23472	-7.76528	217.562	GAPDH	M1 6287	2		23.5992	23.7079			0.0357035	1185.93	16.5015	0.116125
CXCL10	Unkn-02	2		28.3116	27.9426												1.20276	146.328	0.0307563	13.24
CXCL10	Unkn-02	2		27.8988	27.9426													30.1	70.1712
CXCL10	Unkn-03	3		33.0978	33.5031	7.72163	-4.27837	19.4052	GAPDH	M2A 6287	3		25.897	25.7814
CXCL10	Unkn-03	3		33.9825	33.5031
CXCL10	Unkn-03	3		33.4289	33.5031
CXCL10	Unkn-04	4		39.8163	39.3301	13.867	1.867	0.274143	GAPDH	M2C 6287	4		25.6155	25.4631
CXCL10	Unkn-04	4		40.1298	39.3301
CXCL10	Unkn-04	4		38.0442	39.3301
CXCL10	Unkn-05	5		22.5161	22.6835	2.74396	-9.25604	611.427	GAPDH	M1 25.5	5		20.0064	19.9395			m0	m1	m2a	m2c
CXCL10	Unkn-05	5		23.0108	22.6835											average	13.7414	519.637	18.4003	26.3605
CXCL10	Unkn-05	5		22.5236	22.6835											stdv	21.9355	466.507	26.6664	31.0951
CXCL10	Unkn-06	6		31.2099	31.4577	12.7589	0.758894	0.590949	GAPDH	M2A 25.5	6		18.7553	18.6988		sem	9.80984	190.451	10.8865	13.9062
CXCL10	Unkn-06	6		31.7054	31.8325													0.0398589	0.025268	0.044119
CXCL10	Unkn-06	6		32.5822	31.8325
CXCL10	Unkn-07	7		26.5028	26.5094	8.01959	-3.98041	15.7842	GAPDH	M0 25.7	7		18.5176	18.4898
CXCL10	Unkn-07	7		26.5161	26.5094
CXCL10	Unkn-07	7			0
CXCL10	Unkn-08	8		23.2915	23.3776	2.1444	-9.8556	926.469	GAPDH	M1 25.7	8		21.2517	21.2332
CXCL10	Unkn-08	8		23.4738	23.3776
CXCL10	Unkn-08	8		23.3673	23.3776
CXCL10	Unkn-09	9		29.156	29.1945	10.1116	-1.88836	3.70213	GAPDH	M2A 25.7	9		19.0855	19.0828
CXCL10	Unkn-09	9		29.2454	29.1945
CXCL10	Unkn-09	9		29.182	29.1945
CXCL10	Unkn-10	10		25.8376	25.8393	5.89807	-6.10193	68.6852	GAPDH	M2C 27.7	10		19.807	19.9413		Legend
CXCL10	Unkn-10	10		25.9195	25.8393											(A) Human M0 macrophages (hMdɸs) were polarized to form M1, M2a, or M2c hMdɸs, and expression of the phenotype-specific markers CXCL10, CCL17, and CD163, respectively, was confirmed using quantitative real-time PCR (n=5 per group, one-way ANOVA with multiple comparisons).
CXCL10	Unkn-10	10		25.761	25.8393
CXCL10	Unkn-11	11		28.1752	28.1332	6.32289	-5.67711	51.1658	GAPDH	M0 NO NAME	11		21.7983	21.8103
CXCL10	Unkn-11	11		28.0989	28.1332
CXCL10	Unkn-11	11		28.1256	28.1332
CXCL10	Unkn-12	12		25.0022	25.2215	1.78819	-10.2118	1185.93	GAPDH	M1 NO NAME	12		23.4247	23.4333
CXCL10	Unkn-12	12		25.2152	25.2215
CXCL10	Unkn-12	12		25.4471	25.2215
CXCL10	Unkn-13	13		28.1085	28.3463	7.95548	-4.04452	16.5015	GAPDH	M2A NO NAME	13		20.355	20.3908
CXCL10	Unkn-13	13		28.2419	28.3463
CXCL10	Unkn-13	13		28.6884	28.3463
CXCL10	Unkn-14	14		29.9222	29.8646	6.37102	-5.62898	49.487	GAPDH	M2C NO NAMR	14		23.5152	23.4935
CXCL10	Unkn-14	14		29.7156	29.8646
CXCL10	Unkn-14	14		29.9559	29.8646
CXCL10	Unkn-15	15		39.8757	38.8892	16.8078	4.80779	0.0357035	GAPDH	M0 6251	15		22.1631	22.0814
CXCL10	Unkn-15	15		38.2401	38.8892
CXCL10	Unkn-15	15		38.5519	38.8892
CXCL10	Unkn-16	16		27.4836	27.4769	4.80693	-7.19307	146.328	GAPDH	M1 6251	16		23.2337	22.67
CXCL10	Unkn-16	16		27.3176	27.4769
CXCL10	Unkn-16	16		27.6296	27.4769
CXCL10	Unkn-17	17			0	17.023	5.02298	0.0307563	GAPDH	M2A 6251	17		23.5607	23.1755
CXCL10	Unkn-17	17		40.1984	40.1984
CXCL10	Unkn-17	17			0
CXCL10	Unkn-18	18			40	15.1062	3.10625	0.116125	GAPDH	M2C 6251	18		25.1731	24.8938
CXCL10	Unkn-18	18			0
CXCL10	Unkn-18	18			0
CXCL10	Unkn-19	19		38.7424	38.1384	11.7336	-0.266354	1.20276	GAPDH	m0 6230	22		26.7924	26.4047
CXCL10	Unkn-19	19		38.9216	38.1384
CXCL10	Unkn-19	19		36.7512	38.1384
CXCL10	Unkn-20	20		32.2975	32.0394	5.86719	-6.13281	70.1712	GAPDH	m1 6230	24		30.7699	30.4682
CXCL10	Unkn-20	20		31.8459	32.0394
CXCL10	Unkn-20	20		31.9748	32.0394
CXCL10	Unkn-21	21		38.2636	37.5565	7.08831	-4.91169	30.1	GAPDH	m2a 6230	23		26.2714	26.1722
CXCL10	Unkn-21	21		36.5866	37.5565
CXCL10	Unkn-21	21		37.8194	37.5565
CXCL10	Unkn-3			35.1756	35.7982	8.27273	-3.72727	13.244	GAPDH	m2c 6230			27.9174	27.5255
CXCL10	Unkn-3			36.0673									27.1933
CXCL10	Unkn-3			36.1518									27.4658

## Sheet: qPCR CCL17
Target Name	Well	Sample Name		Cт	Cт Mean	ΔCт	ΔΔCT	2^(-ΔΔCT)
CCL17	Unkn-01	1	m1--1	30.2211	30.2049	6.49699	0.496985	0.708586
CCL17	Unkn-01	1		30.2179	30.2049
CCL17	Unkn-01	1		30.1755	30.2049
CCL17	Unkn-02	2	m2a-1		0
CCL17	Unkn-02	2			0
CCL17	Unkn-02	2			0
CCL17	Unkn-03	3	m1-2	27.8241	27.6706	7.73107	1.73107	0.301228
CCL17	Unkn-03	3		27.7266	27.6706
CCL17	Unkn-03	3		27.4612	27.6706
CCL17	Unkn-04	4	m2a-2	17.7095	17.7465	-0.952306	-6.95231	123.838
CCL17	Unkn-04	4		17.7633	17.7465
CCL17	Unkn-04	4		17.7667	17.7465									m0	M1	M2a	m2c
CCL17	Unkn-05	5	m1-3	24.8735	24.7716	3.53843	-2.46157	5.50818					1	0.008	0.708586	123.838	0.029
CCL17	Unkn-05	5		24.935	24.7716								2	0.319	0.301228	85.4889	0.408
CCL17	Unkn-05	5		24.5062	24.7716								3	0.03	5.50818	11.0322	0.151
CCL17	Unkn-06	6	m2a-3	18.605	18.6652	-0.417665	-6.41766	85.4889					4	0.003	0.0713783	13.5916	1.1582
CCL17	Unkn-06	6		18.9892	18.6652								5		0.0204205	20.1949
CCL17	Unkn-06	6		18.4013	18.6652										0.286782	122.472
CCL17	Unkn-07	7	m1-4	33.5409	33.2417	9.80837	3.80837	0.0713783							4.39723
CCL17	Unkn-07	7		33.0153	33.2417										0.0820642
CCL17	Unkn-07	7		33.1688	33.2417
CCL17	Unkn-08	8	m2a-4	22.9057	22.9271	2.53635	-3.46365	11.0322
CCL17	Unkn-08	8		22.801	22.9271
CCL17	Unkn-08	8		23.0747	22.9271									M0	M1	M2a	M2C
CCL17	Unkn-09	9	m1-5	34.5835	34.2814	11.6138	5.61384	0.0204205					mean	0.09	1.42198	62.7695	0.43655
CCL17	Unkn-09	9		34.0446	34.2814								stdv	0.153117	2.35587	54.2543	0.506369
CCL17	Unkn-09	9		34.216	34.2814								sem	0.0684758	1.05358	24.2632	0.226455
CCL17	NTC				0
CCL17	NTC				0
GAPDH	Std-11	1	m1--1	23.5992	23.7079
GAPDH	Std-11	1		23.7498	23.7079
GAPDH	Std-11	1		23.7746	23.7079
GAPDH	Std-12	2	m2a-1	25.897	25.7814
GAPDH	Std-12	2		25.8533	25.7814
GAPDH	Std-12	2		25.5941	25.7814
GAPDH	Std-13	3	m1-2	20.0064	19.9395
GAPDH	Std-13	3		19.8634	19.9395
GAPDH	Std-13	3		19.9488	19.9395
GAPDH	Std-14	4	m2a-2	18.7553	18.6988
GAPDH	Std-14	4		18.8112	18.6988
GAPDH	Std-14	4		18.5299	18.6988
GAPDH	Std-15	5	m1-3	21.2517	21.2332
GAPDH	Std-15	5		21.2811	21.2332
GAPDH	Std-15	5		21.1666	21.2332
GAPDH	Std-16	6	m2a-3	19.0855	19.0828
GAPDH	Std-16	6		19.1809	19.0828
GAPDH	Std-16	6		18.9821	19.0828
GAPDH	Std-17	7	m1-4	23.4247	23.4333
GAPDH	Std-17	7		23.5109	23.4333
GAPDH	Std-17	7		23.3642	23.4333
GAPDH	Std-18	8	m2a-4	20.355	20.3908
GAPDH	Std-18	8		20.3012	20.3908
GAPDH	Std-18	8		20.5162	20.3908
GAPDH	Std-19	9	m1-5	23.2337	22.6675
GAPDH	Std-19	9		22.7234	22.8562
GAPDH	Std-19	9		22.6116	22.8562
GAPDH	NTC			37.3475	37.3475
GAPDH	NTC				0
CCL17	Unkn-13		M1-1	35.0793	34.861	7.80197	1.80197	0.286782
CCL17	Unkn-13			33.2033	34.3085
CCL17	Unkn-13			34.6427	34.3085
CCL17	Unkn-14			32.6075	32.7525
CCL17	Unkn-14			32.906	32.7525
CCL17	Unkn-14			32.7441	32.7525
CCL17	Unkn-15		M2a-1	25.0514	24.9562	2.23536	-3.76464	13.5916
CCL17	Unkn-15			24.8009	24.9562
CCL17	Unkn-15			25.0164	24.9562
CCL17	Unkn-16			21.9165	21.8402
CCL17	Unkn-16			21.7103	21.8402
CCL17	Unkn-16			21.8938	21.8402
CCL17	Unkn-17		m1-2	32.2302	32.1963	3.86341	-2.13659	4.39723
CCL17	Unkn-17			32.0623	32.1963
CCL17	Unkn-17			32.2962	32.1963
CCL17	Unkn-18			31.8523	32.1489
CCL17	Unkn-18			32.096	32.1489
CCL17	Unkn-18			32.4982	32.1489
CCL17	Unkn-19		m2a-2	26.006	25.9364	1.66408	-4.33592	20.1949
CCL17	Unkn-19			25.8844	25.9364
CCL17	Unkn-19			25.9188	25.9364
CCL17	Unkn-20			23.9821	23.9089
CCL17	Unkn-20			23.7866	23.9089
CCL17	Unkn-20			23.958	23.9089
CCL17	Unkn-21		m1-3	35.3063	35.2192	9.6071	3.6071	0.0820642
CCL17	Unkn-21			36.4663	35.6349
CCL17	Unkn-21			35.1322	35.6349
CCL17	Unkn-22			34.0813	34.5187
CCL17	Unkn-22			34.6381	34.5187
CCL17	Unkn-22			34.8366	34.5187
CCL17	Unkn-23		m2a-4	22.4161	22.4498	-0.936302	-6.9363	122.472
CCL17	Unkn-23			22.3967	22.4498
CCL17	Unkn-23			22.5367	22.4498
CCL17	Unkn-24			22.114	22.0806
CCL17	Unkn-24			22.024	22.0806
CCL17	Unkn-24			22.1037	22.0806
GAPDH	NTC				0
TNF	NTC				0
GAPDH	NTC			39.1571	39.1571
TNF	NTC				0
GAPDH	Unkn-01		M1-1	26.9806	27.0591
GAPDH	Unkn-01			27.1375	26.8622
GAPDH	Unkn-01			26.4685	26.8622
GAPDH	Unkn-02			26.8587	26.3624
GAPDH	Unkn-02			26.1738	26.3624
GAPDH	Unkn-02			26.0546	26.3624
GAPDH	Unkn-03		M2a-1	23.1522	22.7209
GAPDH	Unkn-03			22.5047	22.7209
GAPDH	Unkn-03			22.5058	22.7209
GAPDH	Unkn-04			24.6399	24.4989
GAPDH	Unkn-04			24.2122	24.4989
GAPDH	Unkn-04			24.6446	24.4989
GAPDH	Unkn-05		m1-2	28.6704	28.3328
GAPDH	Unkn-05			28.1578	28.3328
GAPDH	Unkn-05			28.1703	28.3328
GAPDH	Unkn-06			28.0794	27.8144
GAPDH	Unkn-06			27.5925	27.8144
GAPDH	Unkn-06			27.7712	27.8144
GAPDH	Unkn-07		m2a-2	24.491	24.2723
GAPDH	Unkn-07			24.1879	24.2723
GAPDH	Unkn-07			24.138	24.2723
GAPDH	Unkn-08			21.4715	21.8835
GAPDH	Unkn-08			22.2844	21.8835
GAPDH	Unkn-08			21.8945	21.8835
GAPDH	Unkn-09		m1-3	25.7578	25.6121
GAPDH	Unkn-09			25.5041	25.6121
GAPDH	Unkn-09			25.5745	25.6121
GAPDH	Unkn-10			24.9962	24.923
GAPDH	Unkn-10			25.0101	24.923
GAPDH	Unkn-10			24.7628	24.923
GAPDH	Unkn-11		m2a-4	23.5383	23.3862
GAPDH	Unkn-11			23.3289	23.3862
GAPDH	Unkn-11			23.2912	23.3862
GAPDH	Unkn-12			21.6248	21.8865
GAPDH	Unkn-12			22.0407	21.8865
GAPDH	Unkn-12			21.9941	21.8865
CCL17	Unkn-01	1	M0		36.2507	13.0223	7.02232	0.00769257
CCL17	Unkn-01	1		35.8855	36.2507
CCL17	Unkn-01	1		36.616	36.2507
CCL17	Unkn-02	2	M2c		36.58	11.1169	5.11689	0.0288178
CCL17	Unkn-02	2		39.259	37.9203
CCL17	Unkn-02	2		36.5816	37.9203
CCL17	Unkn-03	3	M0	26.2307	26.1391	7.64927	1.64927	0.318801
CCL17	Unkn-03	3		26.152	26.1391
CCL17	Unkn-03	3		26.0347	26.1391
CCL17	Unkn-04	4	M2c	27.3106	27.2336	7.2923	1.2923	0.4083
CCL17	Unkn-04	4		27.2769	27.2336
CCL17	Unkn-04	4		27.1132	27.2336
CCL17	Unkn-05	5	M0	33.2355	32.8659	11.0556	5.05559	0.0300689
CCL17	Unkn-05	5		33.1962	32.8659
CCL17	Unkn-05	5		32.1661	32.8659
CCL17	Unkn-06	6	M2c	32.6246	32.2251	8.73151	2.73151	0.150568
CCL17	Unkn-06	6		32.2185	32.2251
CCL17	Unkn-06	6		31.8321	32.2251
CCL17	Unkn-07	7	M0	36.1281	36.4287	14.3473	8.34726	0.00307061
CCL17	Unkn-07	7		36.7293	35.9856
CCL17	Unkn-07	7		35.0993	35.9856
CCL17	NTC				0
CCL17	NTC				0
GAPDH	Std-13	1		23.198	23.2284
GAPDH	Std-13	1		23.2432	23.2284
GAPDH	Std-13	1		23.244	23.2284
GAPDH	Std-14	2		25.6155	25.4631
GAPDH	Std-14	2		25.503	25.4631
GAPDH	Std-14	2		25.2708	25.4631
GAPDH	Std-15	3		18.5176	18.4898
GAPDH	Std-15	3		18.5269	18.4898
GAPDH	Std-15	3		18.4251	18.4898
GAPDH	Std-16	4		19.807	19.9413
GAPDH	Std-16	4		19.9781	19.9413
GAPDH	Std-16	4		20.0387	19.9413
GAPDH	Std-17	5		21.7983	21.8103
GAPDH	Std-17	5		21.8554	21.8103
GAPDH	Std-17	5		21.7772	21.8103
GAPDH	Std-18	6		23.5152	23.4935
GAPDH	Std-18	6		23.5312	23.4935
GAPDH	Std-18	6		23.4342	23.4935
GAPDH	Std-19	7		22.1631	22.0814
GAPDH	Std-19	7		22.0608	22.0814
GAPDH	Std-19	7		22.0204	22.0814
ccl17	Unkn-7		m2c	33.1648	33.3135	5.78801	-0.211986	1.15828
ccl17	Unkn-7			33.4622
ccl17	Unkn-7			33.5918
GAPDH	Unkn-14	7		27.9174	27.5255
GAPDH	Unkn-14	7		27.1933
GAPDH	Unkn-14	7		27.4658

## Sheet: qPCR CD163 
Target Name	Well	Sample Name		Cт	Cт Mean	ΔCт	ΔΔCT	2^(-ΔΔCT)
cd163	Unkn-01	1		23.7299	23.7399	0.511463	0.011463	0.992086		GAPDH	M0 6287	1		23.198	23.2284											m0	m1	m2a	m2c		m0	m1	m2a	m2c
cd163	Unkn-01	1		23.81	23.7399					GAPDH	M1 6287	2		23.5992	23.7079											0.992086	8.42419	5.30471	0.809286		0.992086			0.809286
cd163	Unkn-01	1		23.6797	23.7399					GAPDH	M2A 6287	3		25.897	25.7814											0.138387	0.0345551	0.0664642	0.89291		0.138387	0.0345551	0.0664642	0.89291
cd163	Unkn-02	2		21.2178	21.1333	-2.57454	-3.07454	8.42419		GAPDH	M2C 6287	4		25.6155	25.4631											0.0168013	0.121658	0.341202	0.0646637		0.0168013	0.121658	0.341202	0.0646637
cd163	Unkn-02	2		21.2492	21.1333					GAPDH	M1 25.5	5		20.0064	19.9395											0.392732	0.00543354	0.00342686	4.78201		0.392732	0.00543354	0.00342686	4.78201
cd163	Unkn-02	2		20.9331	21.1333					GAPDH	M2A 25.5	6		18.7553	18.6988											0.339496	0.415695	0.388475	31.1852		0.339496	0.415695	0.388475	31.1852
cd163	Unkn-03	3		24.0468	23.8742	-1.90728	-2.40728	5.30471		GAPDH	M0 25.7	7		18.5176	18.4898											1.21545	0.599794	1.06114			1.21545	0.599794	1.06114
cd163	Unkn-03	3		23.8826	23.8742					GAPDH	M1 25.7	8		21.2517	21.2332											1.55211	0.127674	0.605744	3.15939		1.55211	0.127674	0.605744	3.15939
cd163	Unkn-03	3		23.6932	23.8742					GAPDH	M2A 25.7	9		19.0855	19.0828											2.86191	0.455254	0.478617	26.2945		2.86191	0.455254	0.478617	26.2945
cd163	Unkn-04	4		25.9947	26.2684	0.805278	0.305278	0.809286		GAPDH	M2C 27.7	10		19.807	19.9413											3.8609	0.628874	0.337135				0.628874	0.337135
cd163	Unkn-04	4		25.9114	26.2684					GAPDH	M0 NO NAME	11		21.7983	21.8103											1.08979	7.94902	1.93226			1.08979	7.94902	1.93226
cd163	Unkn-04	4		26.8991	26.2684					GAPDH	M1 NO NAME	12		23.4247	23.4333											1.63568	1.22789	0.254291			1.63568	1.22789	0.254291
cd163	Unkn-05	5		25.1608	25.2945	5.35496	4.85496	0.0345551		GAPDH	M2A NO NAME	13		20.355	20.3908												1.31343	0.824204				1.31343	0.824204
cd163	Unkn-05	5		25.0979	25.2945					GAPDH	M2C NO NAMR	14		23.5152	23.4935													0.817639					0.817639
cd163	Unkn-05	5		25.6247	25.2945					GAPDH	M0 6251	15		22.1631	22.0814
cd163	Unkn-06	6		23.1032	23.1101	4.41128	3.91128	0.0664642		GAPDH	M1 6251	16		23.2337	22.67											m0	m1	m2a	m2c
cd163	Unkn-06	6		23.3115	23.1101					GAPDH	M2A 6251	17		23.5607	23.1755										average	1.2814	1.77529	0.955024	9.59828		1.02345	1.17084	0.579385	9.59828
cd163	Unkn-06	6		22.9155	23.1101					GAPDH	M2C 6251	18		25.1731	24.8938										stdv	1.18566	3.02617	1.53278	13.2497		0.865305	2.41489	0.329681	13.2497
cd163	Unkn-07	7		22.2691	21.8431	3.35322	2.85322	0.138387		GAPDH	m0 6230	22		26.7924	26.4047										error	3.65272	7.82762	4.02058	36.0977
cd163	Unkn-07	7		21.8072	21.8431					GAPDH	m1 6230	24		30.7699	30.4682										sem						0.273633	0.763656	0.104254	4.18993
cd163	Unkn-07	7		21.4528	21.8431					GAPDH	m2a 6230	23		26.2714	26.1722
cd163	Unkn-08	8		25.1895	24.7722	3.53909	3.03909	0.121658
cd163	Unkn-08	8		24.7788	24.7722
cd163	Unkn-08	8		24.3485	24.7722
cd163	Unkn-09	9		21.3773	21.1341	2.0513	1.5513	0.341202
cd163	Unkn-09	9		21.099	21.1341
cd163	Unkn-09	9		20.9261	21.1341
cd163	Unkn-10	10		20.961	20.6047	0.663413	0.163413	0.89291
cd163	Unkn-10	10		20.5367	20.6047
cd163	Unkn-10	10		20.3162	20.6047
cd163	Unkn-11	11		28.4649	28.2056	6.39528	5.89528	0.0168013
cd163	Unkn-11	11		28.1334	28.2056
cd163	Unkn-11	11		28.0185	28.2056
cd163	Unkn-12	12		31.3677	31.4572	8.02389	7.52389	0.00543354
cd163	Unkn-12	12		31.4929	31.4572
cd163	Unkn-12	12		31.511	31.4572
cd163	Unkn-13	13		29.1991	29.0797	8.6889	8.1889	0.00342686
cd163	Unkn-13	13		28.9603	29.5964
cd163	Unkn-13	13		30.6299	29.5964
cd163	Unkn-14	14		27.8493	27.9444	4.4509	3.9509	0.0646637
cd163	Unkn-14	14		28.0396	28.271
cd163	Unkn-14	14		28.9241	28.271
cd163	Unkn-15	15		24.1667	23.9298	1.84838	1.34838	0.392732
cd163	Unkn-15	15		23.6935	23.9298
cd163	Unkn-15	15		23.9293	23.9298
cd163	Unkn-16	16		24.4826	24.4364	1.7664	1.2664	0.415695
cd163	Unkn-16	16		24.272	24.4364
cd163	Unkn-16	16		24.5546	24.4364
cd163	Unkn-17	17		25.2104	25.0396	1.86411	1.36411	0.388475
cd163	Unkn-17	17		24.8629	25.0396
cd163	Unkn-17	17		25.0454	25.0396
cd163	Unkn-18	18		23.4573	23.1361	-1.75762	-2.25762	4.78201
cd163	Unkn-18	18		22.8886	23.1361
cd163	Unkn-18	18		23.0625	23.1361
cd163	Unkn-19	19		26.9102	26.6233	0.218506	-0.281494	1.21545
cd163	Unkn-19	19		26.3538	26.6233
cd163	Unkn-19	19		26.6058	26.6233
cd163	Unkn-20	20		32.0321	31.7057	1.23746	0.737462	0.599794
cd163	Unkn-20	20		31.4432	31.7057
cd163	Unkn-20	20		31.6416	31.7057
cd163	Unkn-21	21		26.8476	26.5866	0.414392	-0.0856083	1.06114
cd163	Unkn-21	21		26.4229	26.5866
cd163	Unkn-21	21		26.4892	26.5866
	Unkn				0
	Unkn				0
cd163	NTC				0
cd163	NTC				0
				Cт	Cт Mean	ΔCт	ΔΔCT	2^(-ΔΔCT)
cd163	Unkn-01	1		24.5239	24.5683	-2.49078	-2.99078	7.94902					m1	A01	SYBR	GAPDH	Unkn-01			26.9806	27.0591
cd163	Unkn-01	1		24.7537	24.5683									B01	SYBR	GAPDH	Unkn-01			27.1375	26.8622
cd163	Unkn-01	1		24.4272	24.5683									C01	SYBR	GAPDH	Unkn-01			26.4685	26.8622
cd163	Unkn-02	2		24.7261	24.7895	2.0686	1.5686	0.337135					m2a	A03	SYBR	GAPDH	Unkn-03			23.1522	22.7209
cd163	Unkn-02	2		24.9491	24.7895									B03	SYBR	GAPDH	Unkn-03			22.5047	22.7209
cd163	Unkn-02	2		24.6932	24.7895									C03	SYBR	GAPDH	Unkn-03			22.5058	22.7209
cd163	Unkn-03	3		29.6866	29.9681	1.63526	1.13526	0.455254					m1	A05	SYBR	GAPDH	Unkn-05			28.6704	28.3328
cd163	Unkn-03	3		30.1179	29.9681									B05	SYBR	GAPDH	Unkn-05			28.1578	28.3328
cd163	Unkn-03	3		30.0999	29.9681									C05	SYBR	GAPDH	Unkn-05			28.1703	28.3328
cd163	Unkn-04	4		23.742	23.822	-0.450292	-0.950292	1.93226					m2a	A07	SYBR	GAPDH	Unkn-07			24.491	24.2723
cd163	Unkn-04	4		23.9377	23.822									B07	SYBR	GAPDH	Unkn-07			24.1879	24.2723
cd163	Unkn-04	4		23.7863	23.822									C07	SYBR	GAPDH	Unkn-07			24.138	24.2723
cd163	Unkn-05	5		26.6872	26.7813	1.16916	0.669157	0.628874					m1	A09	SYBR	GAPDH	Unkn-09			25.7578	25.6121
cd163	Unkn-05	5		26.9019	26.7813									B09	SYBR	GAPDH	Unkn-09			25.5041	25.6121
cd163	Unkn-05	5		26.7547	26.7813									C09	SYBR	GAPDH	Unkn-09			25.5745	25.6121
cd163	Unkn-06	6		25.131	25.2104	1.8242	1.3242	0.824204					m2a	A11	SYBR	GAPDH	Unkn-11			23.5383	23.3862
cd163	Unkn-06	6		25.3086	25.2104									B11	SYBR	GAPDH	Unkn-11			23.3289	23.3862
cd163	Unkn-06	6		25.1915	25.2104									C11	SYBR	GAPDH	Unkn-11			23.2912	23.3862
cd163	Unkn-09	9		24.22	24.2358	0.203817	-0.296183	1.22789					m1	clu 6 M1		GAPDH	24.032
cd163	Unkn-09	9		24.357	24.2358											GAPDH
cd163	Unkn-09	9		24.1304	24.2358											GAPDH
cd163	Unkn-10	10		31.4524	31.5748	2.47545	1.97545	0.254291					m2a	clu 6 M2		GAPDH	29.0994
cd163	Unkn-10	10		31.7247	31.5748											GAPDH
cd163	Unkn-10	10		31.5475	31.5748											GAPDH
cd163	Unkn-11	11		26.1074	26.0995	0.106661	-0.393339	1.31343					m1	clu 7 M1		GAPDH	25.9928
cd163	Unkn-11	11		26.0956	26.0995											GAPDH
cd163	Unkn-11	11		26.0955	26.0995											GAPDH
cd163	Unkn-12	12		37.4721	37.3919	0.790464	0.290464	0.817639					m2a	clu 7 M2		GAPDH	36.6014
cd163	Unkn-12	12		38.2273	37.6704
cd163	Unkn-12	12		37.3117	37.6704
													H05	SYBR	GAPDH	NTC				0
				Cт	Cт Mean	ΔCт	ΔΔCT	2^(-ΔΔCT)					H06	SYBR	GAPDH	NTC				0
cd163	Unkn-13	13	m0-1	22.127	22.0431	-1.01698	-1.51698	2.86191					D05	SYBR	GAPDH	Unkn-17	13		23.1314	23.0601
cd163	Unkn-13	13		21.907	22.0431								E05	SYBR	GAPDH	Unkn-17	13		22.8847	23.0601
cd163	Unkn-13	13		22.0954	22.0431								F05	SYBR	GAPDH	Unkn-17	13		23.1642	23.0601
cd163	Unkn-14	14	m0-2	21.5438	21.4598	-1.44894	-1.94894	3.8609					D06	SYBR	GAPDH	Unkn-18	14		22.8659	22.9087
cd163	Unkn-14	14		21.3704	21.4598								E06	SYBR	GAPDH	Unkn-18	14		23.0487	22.9087
cd163	Unkn-14	14		21.4651	21.4598								F06	SYBR	GAPDH	Unkn-18	14		22.8116	22.9087
cd163	Unkn-15	15	m0-3	23.6076	23.4332	0.375947	-0.124053	1.08979					D07	SYBR	GAPDH	Unkn-19	15		23.1573	23.0572
cd163	Unkn-15	15		23.3213	23.4332								E07	SYBR	GAPDH	Unkn-19	15		22.9767	23.0572
cd163	Unkn-15	15		23.3705	23.4332								F07	SYBR	GAPDH	Unkn-19	15		23.0377	23.0572
cd163	Unkn-16	16	m0-4	25.1229	25.0714	-0.209894	-0.709894	1.63568					D08	SYBR	GAPDH	Unkn-20	16		25.339	25.2813
cd163	Unkn-16	16		24.9757	25.0714								E08	SYBR	GAPDH	Unkn-20	16		25.2917	25.2813
cd163	Unkn-16	16		25.1155	25.0714								F08	SYBR	GAPDH	Unkn-20	16		25.2131	25.2813
					Cт	Cт Mean	ΔCт	ΔΔCT	2^(-ΔΔCT)
cd163	Unkn-01	1			0					m2a-2
cd163	Unkn-01	1			0
cd163	Unkn-01	1		37.2255	37.2255
cd163	Unkn-03	2			0					m1.3
cd163	Unkn-03	2			0
cd163	Unkn-03	2			0
cd163	Unkn-05	3		34.7802	34.9655	34.777	1.22322	0.723219	0.605744	m2a.3
cd163	Unkn-05	3		34.7739	34.9655
cd163	Unkn-05	3		35.3425	34.9655
cd163	Unkn-07	4		34.8675	34.8126	34.8126	-2.41275	-2.91275	7.53052	m2c.4
cd163	Unkn-07	4		34.6678	34.8126
cd163	Unkn-07	4		34.9025	34.8126
cd163	Unkn-09	5		30.5128	30.5176	30.5176	-4.46279	-4.96279	31.1852	m2c.1
cd163	Unkn-09	5		30.581	30.5176
cd163	Unkn-09	5		30.4588	30.5176
cd163	Unkn-11	6		36.2769	35.9036	36.3098	-0.308283	-0.808283	1.75113	m2a.1
cd163	Unkn-11	6		36.3427	35.9036
cd163	Unkn-11	6		35.0912	35.9036
cd163	Unkn-13	7		26.4487	26.3957	26.3957	-1.15965	-1.65965	3.15939	m2c.3
cd163	Unkn-13	7		26.3789	26.3957
cd163	Unkn-13	7		26.3595	26.3957
cd163	Unkn-15	8		38.3235	38.671	38.36	1.56306	1.06306	0.478617	m2a.4
cd163	Unkn-15	8		39.2928	38.671
cd163	Unkn-15	8		38.3966	38.671
cd163	Unkn-17	9		30.897	31.351	31.5779	2.05853	1.55853	0.339496	m0.1
cd163	Unkn-17	9		31.727	31.351
cd163	Unkn-17	9		31.4289	31.351
cd163	Unkn-19	10		35.9105	36.755	36.755	0.885904	0.385904	0.765299	m1.1
cd163	Unkn-19	10			0
cd163	Unkn-19	10		37.5994	36.755
cd163	Unkn-21	11		34.8842	34.8483	34.8483	3.46947	2.96947	0.127674	m1.4
cd163	Unkn-21	11		35.1002	34.8483
cd163	Unkn-21	11		34.5604	34.8483
cd163	Unkn-23	12		33.9559	34.8171	35.2477	-0.134234	-0.634234	1.55211	m0.3
cd163	Unkn-23	12		35.5981	34.8171
cd163	Unkn-23	12		34.8973	34.8171
cd163	Unkn-25	13			0					m1.2
cd163	Unkn-25	13			0
cd163	Unkn-25	13			0
cd163	Unkn-27	14		30.4571	30.5606	30.5606	-4.21669	-4.71669	26.2945	m2c.2
cd163	Unkn-27	14		30.4111	30.5606
cd163	Unkn-27	14		30.8135	30.5606
cd163	NTC				0
cd163	NTC				0
GAPDH	Unkn-02	1		34.3117	34.6059	34.334
GAPDH	Unkn-02	1		34.3564	34.6059
GAPDH	Unkn-02	1		35.1495	34.6059
GAPDH	Unkn-04	2			0	#DIV/0!
GAPDH	Unkn-04	2			0
GAPDH	Unkn-04	2		38.774	38.774
GAPDH	Unkn-06	3		33.7731	33.5742	33.5538
GAPDH	Unkn-06	3		33.3346	33.5742
GAPDH	Unkn-06	3		33.6148	33.5742
GAPDH	Unkn-08	4		37.2253	37.2253	37.2253
GAPDH	Unkn-08	4			0
GAPDH	Unkn-08	4			0
GAPDH	Unkn-10	5		34.9188	35.6785	34.9803
GAPDH	Unkn-10	5		35.0419	35.6785
GAPDH	Unkn-10	5		37.0749	35.6785
GAPDH	Unkn-12	6		36.2098	36.1599	36.6181
GAPDH	Unkn-12	6		37.0263	36.1599
GAPDH	Unkn-12	6		35.2436	36.1599
GAPDH	Unkn-14	7		27.9174	27.5255	27.5553
GAPDH	Unkn-14	7		27.1933	27.5255
GAPDH	Unkn-14	7		27.4658	27.5255
GAPDH	Unkn-16	8		36.6452	36.537	36.797
GAPDH	Unkn-16	8		36.9487	36.537
GAPDH	Unkn-16	8		36.017	36.537
GAPDH	Unkn-18	9		29.6905	29.5194	29.5194
GAPDH	Unkn-18	9		29.3976	29.5194
GAPDH	Unkn-18	9		29.4701	29.5194
GAPDH	Unkn-20	10		36.2457	36.7782	35.8691
GAPDH	Unkn-20	10		35.4924	36.7782
GAPDH	Unkn-20	10		38.5966	36.7782
GAPDH	Unkn-22	11		31.39	31.437	31.3788
GAPDH	Unkn-22	11		31.3676	31.437
GAPDH	Unkn-22	11		31.5533	31.437
GAPDH	Unkn-24	12		36.497	35.7536	35.3819
GAPDH	Unkn-24	12		35.3084	35.7536
GAPDH	Unkn-24	12		35.4554	35.7536
GAPDH	Unkn-26	13		38.7591	38.7591	38.7591
GAPDH	Unkn-26	13			0
GAPDH	Unkn-26	13			0
GAPDH	Unkn-28	14		35.1162	34.7773	34.7773
GAPDH	Unkn-28	14		34.6585	34.7773
GAPDH	Unkn-28	14		34.5571	34.7773
