# Supplementary material for: CCR1 mediates Müller cell activation and photoreceptor cell death in macular and retinal degeneration
Source: eLife. 2023 Oct 30;12:e81208. doi: 10.7554/eLife.81208 (PMC10615370; doi:10.7554/eLife.81208)
Supplement: Figure 1—source data 2. [file elife-81208-fig1-data2.xlsx]

## Sheet: ERG
	ERG analyze
	0.0006	0.0025	0.01	0.04	0.16	0.63	2.5	10
M0	2.4	2.54902	2.13559	1.90123	1.69608	2.48	2.12658	2.0122
	0.944444	1.0625	1.26316	0.817996	0.75	0.853933	0.424561
	1.48837	1.37853	1.60897	1.40506	1.36406	1.25984	1.32857	1.22344
	1.28161	1.24268	1.28571	1.46454	1.43103	1.39474	1.33681	1.32727
	1.1	1.11364	1.14286	0.714286	1.2	1.28571	0.866667	1.28125
	1.26875	1.22026	1.17476	1.205	1.09746	1.00474	0.958333	1.03676
geomean	1.34929	1.35919	1.39884	1.18397	1.21832	1.29911	1.04892	1.34124
ttest	0.127435	0.133101	0.0701455	0.243365	0.126361	0.243261	0.556104	0.0996394
stdv	0.516804	0.560187	0.381048	0.440411	0.32258	0.57465	0.57627	0.372307
error +	2.38289	2.47956	2.16094	2.06479	1.86347	2.44841	2.20146	2.08585
error -	0.315678	0.238813	0.636745	0.303147	0.573156	0.149813	-0.103623	0.596623
sem	0.231122	0.250523	0.17041	0.196958	0.144262	0.256991	0.257716	0.166501
M1	0.989583	0.942029	0.923077	0.828729	0.783784	0.77459	0.791855	0.871972
	1.28571	1	0.777574	0.965517	0.825397	0.661017	2.2963	0.5625
	1.13291	1.0559	0.94152	1	1.04688	0.965665	0.941441
	1	1.23188	1.82051	1.06838	1.27273	1.85714	1.5
	1.02556	1.02184	1.05957	1.04922	1.07639	1.10478	1.05922	1.01751
	0.628571	0.857143	1.06383	0.836538	1.03472	0.958333	0.828326	0.88601
	2.2	1.94	1.91034	1.89262	2.13514	2.44286	2.44068	1.93284
	0.481481	0.744898	0.834646	0.8	0.777778		0.724771	0.583333
geomean	0.998019	1.05639	1.10428	1.01607	1.06004	1.13152	1.18866	0.89047
ttest	0.65051	0.425762	0.678692	0.997532	0.667882	0.825529	0.435336	0.192303
stdv	0.517925	0.368602	0.443086	0.353916	0.444858	0.652102	0.689482	0.502264
error +	2.03387	1.79359	1.99045	1.72391	1.94975	2.43573	2.56762	1.895
sem	0.211442	0.150481	0.180889	0.144486	0.181612	0.266219	0.28148	0.205049
M2a	1.07831	1.35507	1.38053	1.34831	1.37692	1.09778	1.19469	1.29915
	0.253425	4.81579	1.66667	4.96774	4.15789	3.33784		1.91852
	1.13953	1.30769		1.89286	2.05714	1.90698	3.04167	1.59524
	1.30588	1.41803	1.22137	1.60656	1.33974	1.36842		1.42941
	1.10882	1.24026	1.11048	1.24332	1.20423	1.19637	1.15845	1.29032
	2.288	2.04217	2.62698	2.37778	1.87379	2.26866	2.30693	1.29864
	1.05556	1.55172	1.57895	1.87879	1.29333	1.83784	1.23188	1
	6.93103	3.67241	5.59375	4.57895	3.90741	4.4375	2.66265	3.5			Legend
	1.53571	1.50893	1.66029	1.42358	1.35974	1.28013	1.18266	1.10847
geomean	1.31292	1.85774	1.81968	2.08275	1.84245	1.86346	1.67937	1.4934
ttest	0.389197	0.0864623	0.0299148	0.0408254	0.0522344	0.0220896	0.0468539	0.00840357
stdv	1.97589	1.26926	1.48349	1.40928	1.1535	1.12671	0.818551	0.759871
error +	5.2647	4.39626	4.78666	4.90131	4.14945	4.11688	3.31647	3.01314
sem	0.746817	0.479736	0.560707	0.532657	0.435982	0.425856	0.309383	0.287204
M2c	1.58824	0.97561	1.02083	0.859375	0.960784	1.01852	1.05333	1.14085
	0.947368	1.07143	1.40678	1.0241	0.690476	0.847619	0.484076
	1.93103	1.7619	1.29508	2	1.85	1.54237	1.70175	1.45455
	1.42424	1.46154	1.28326	1.24555	1.35759	1.3858	1.44803	1.33876
	1.11111	1.54839	1.13924	1.53125	1.05426	1.30435	1.22222	1.13924
	1.07692	0.820513	0.651515	0.858065	0.813187		0.913978	0.624277
	2.80899	3.67857	4.2561	4.98507	3.25581	3.6391	2.83942	3.06422
geomean	1.45656	1.43581	1.33455	1.46321	1.24554	1.43574	1.21838	1.30065
ttest	0.098083	0.218775	0.130589	0.329265	0.525187	0.528287	0.78029	0.0932188
stdv	0.648961	0.969826	1.20622	1.46839	0.894783	1.01937	0.75161	0.835635
error +	2.75448	3.37546	3.74698	4.4	3.03511	3.47447	2.7216	2.97192
sem	0.32448	0.484913	0.603108	0.734196	0.447392	0.509685	0.375805	0.417817
Control	0.935252	0.954048	0.97619	0.906459	0.897025	0.87931	0.899396	0.906318
	0.839286	0.851406	1	0.968944	0.935135	1.06373	1.02064	1.07487
	0.790361	0.709278	0.873894	0.797414	0.829736	0.872984	0.907298	0.889381
	1.22266	1.20606	1.20325	1.16046	1.17113	1.19361	1.13636	1.14231
	0.84399	0.880096	0.934959	0.873085	0.870403	0.923841	0.893382	0.918699
	1.06272	1.14441	1.12857	1.05978	1.05336	1.06729	1.07335	1.08182
	1.03284	0.925214	0.983092	0.995381	0.949393	0.935698	0.949333
	0.764479	0.746032	0.73639	0.745928	0.728659	0.766067	0.748649	0.913793
	0.869474		0.843621	0.925403		0.837713	0.867925	0.868687
geomean	0.918891	0.913063	0.95512	0.929264	0.920846	0.940738	0.937574	0.969545
stdv	0.15859	0.174824	0.14391	0.136503	0.135749	0.136472	0.121284	0.105552
sem	0.0599413	0.0660774	0.0543928	0.0515934	0.0513082	0.0515814	0.045841	0.039895
error+	1.23607	1.26271	1.24294	1.20227	1.19234	1.21368	1.18014	1.18065
error -	0.601712	0.563414	0.6673	0.656257	0.649348	0.667795	0.695006	0.758441
	value over 2stdv

## Sheet: ONL thickeness analyze
	EYE HISTOLOGY ANALYZE
		2100	1800	1500	1200	900	600	300	10	0	10	300	600	900	1200	1500	1800	2100
MO		0.75	1.5	1	0.75	1.5	1	1.5	2	0	2	1	1	1.66667	0.666667	2.25	1.11111
		1.75	0.363636	0.5	3	2	1	1	1.5	0	1.5	3	2	1.5	1	2.66667	1	1.6
		1.125	0.928571	0.933333	1.0625	1.0625	1.42857	1.23529	1	0	1	0.791667	1.10526	1.14286	0.884615	1.29412	1.25
			1	1.1	0.9	1.16667	1.25	1.5	1.25	0	1.25	1.6	1.5	0.909091	1.1	1.1	1.11111	0.625
		1	1.8	1.125	0.571429	0.8	1.25	0.6	0.8	0	0.8	0.8	0.666667	0.722222	1	1.2	0.888889
		1.42857	1.16667	1.8	1.66667	2	1.25	1.66667	1.33	0	1.33	1.33333	4	1	1.2	3.16667	2.625	1.23077
		1	1.33333	0.5	0.333333	0.333333	0.333333	1	0.75	0	0.75	1	0.333333	1	1	1.5	1.8	1.16667
GEOM		1.13247	1.05118	0.91075	0.946998	1.10277	0.989695	1.15724	1.16951	0	1.16951	1.22132	1.16698	1.09403	0.964856	1.74203	1.30603	1.09466
average		1.1756	1.15603	0.994048	1.18342	1.26607	1.07313	1.21457	1.23286	0	1.23286	1.36071	1.51504	1.13441	0.978755	1.88249	1.39802	1.15561
STDV		0.357574	0.459807	0.441554	0.904938	0.615165	0.360135	0.373617	0.436719	0	0.436719	0.779285	1.22201	0.335118	0.16895	0.813395	0.615257	0.401995
sem		0.159912	0.205632	0.197469	0.4047	0.27511	0.161057	0.167087	0.195307	0	0.195307	0.348507	0.546498	0.149869	0.0755569	0.363761	0.275151	0.179778
ERROR +		1.84762	1.97079	1.79386	2.75687	2.3331	1.70997	1.90447	2.04295	0	2.04295	2.77989	3.61099	1.76427	1.30276	3.36882	2.53654	1.89865
ERROR -		0.417319	0.131564	0.0276414	-0.862877	-0.12756	0.269426	0.410002	0.296074	0	0.296074	-0.337247	-1.27704	0.423796	0.626955	0.115241	0.0755173
M1		2100	1800	1500	1200	900	600	300	10	0	10	300	600	900	1200	1500	1800	2100
		1	0.833333	0.153846	0.6	3	1	1	0.8	0	0.8	0.666667	1.25	3.25	2.5	1	0.916667
			3.5	1.2	3	1	1	0.666667	0.6	0	0.6	0.5	1	1.16667	1.875	0.5625	3.14286
	0	0.8	0.571429	1.66667	2	1	2	2	1.5	0	1.5	2	1	1	1.25	1	1.85714
		0.888889	0.75	1.1	0.75	1.66667	0.5	0.2	0.375	0	0.375	0.6	0.6	0.833333	0.461538	0.769231	1.2
			1.22222	1.33333	0.916667	1	1.1	1.2	1	0	1	1.18182	1	0.916667	1	1.1	1.375	1.125
	1	1	1	1.22222	0.888889	0.888889	1.16667	1.2	1	0	1	1.16667	2.66667	2.875	2.66667	0.916667	1.375	1
		0.9	1.1	1.11111	1.66667	0.833333	1	0.714286	1	0	1	1	1	0.888889	1	1	0.916667	1
		1.125	1.66667	7	3	0.5	0.5	1	1	0	1	1	1	0.333333	1.14286	2
					0.75	0.666667	1	1	1	0	1	1	1	1	1.2	1.14286	1	1
GEOM		0.946721	1.1374	1.19966	1.26424	1.02369	0.951897	0.86612	0.864606	0	0.864606	0.936018	1.08006	1.10556	1.28996	0.999694	1.35144	1.02988
average		0.917778	1.28243	1.11245	1.40317	1.34127	1.10952	0.997279	0.896429	0	0.896429	1.01645	1.21667	1.56151	1.53617	0.906914	1.54048	1.04167
stan		0.113426	0.937639	2.12553	0.963453	0.756374	0.437304	0.488966	0.312694	0	0.312694	0.444476	0.585736	0.994595	0.736721	0.396106	0.743781
sem		0.042871	0.354394	0.803373	0.364151	0.285883	0.165285	0.184812	0.118187	0	0.118187	0.167996	0.221387	0.375922	0.278454	0.149714	0.281123
ERROR +		1.17357	3.01268	5.45071	3.19114	2.53644	1.8265	1.84405	1.48999	0	1.48999	1.82497	2.25153	3.09475	2.76341	1.79191	2.839
ERROR -		0.719869	-0.737879	-3.0514	-0.66267	-0.489059	0.0772895	-0.111812	0.239217	0	0.239217	0.0470653	-0.0914118	-0.883634	-0.183477	0.207483	-0.136119
M2A		2100	1800	1500	1200	900	600	300	10	0	10	300	600	900	1200	1500	1800	2100
		0.7	0.5	1.33333	2	3	2	3	3	0	3	0.333333	0.75	0.8	0.5	0.727273	1.6
		2.75	3	1	1	1.5	0.666667	2	1	0	1	1	2	2	1.66667	1.66667	1.5	1.14286
		0.5	2	6	14	8	3.5	1	0.8	0	0.8	1.33333	2.25	3.33333	2.4	1.75
		1	1	0.75	2.5	2	2	2	1.33333	0	1.33333	1	1	0.6	1.16667	0.777778	1.625
			1.2	0.785714	1.2	1	1.09091	0.909091	1	0	1	0.846154	1.08333	1	1	0.846154	1.22222	1.11111
		0.875	1.42857	1.85714	1.33333	1.11111	1	1.66667	1.2	0	1.2	1	1.75	1.27273	1.42857	1	1.125
		1.14286	1.25		0.909091	1	1.21429	1	1	0	1	1.22222	1.2	1.4	1.2		1.5	2
		1.11111	1.4	1.16667	2.5	7	5	5	1	0	1	5	4	1.75	1.2	1.14286	1	1.125
			0.875	0.8	1	1.25	2.5	2	1	0	1	3	0.857143	1	0.333333	0.277778	1	1.11111
GEOM		1.00964	1.25772	1.30028	1.85058	2.07072	1.75077	1.78267	1.16125	0	1.16125	1.23927	1.4382	1.29124	1.05361	0.90328	1.29772	1.25991
average		1.25357	1.64643	2.07857	3.4904	2.43519	1.57864	1.42929	1.05556	0	1.05556	1.06695	1.54722	1.60101	1.47698	1.20812	1.39444	1.41799
stan		0.739884	0.727034	1.77164	4.19606	2.70962	1.39717	1.28765	0.669531	0	0.669531	1.45663	1.02467	0.830822	0.611477	0.491637	0.264195
sem		0.246628	0.242345	0.590546	1.39869	0.903206	0.465723	0.429217	0.223177	0	0.223177	0.485542	0.341556	0.276941	0.203826	0.163879	0.0880649	0
ERROR +		2.48941	2.71179	4.84356	10.2427	7.48996	4.5451	4.35797	2.50031	0	2.50031	4.15253	3.48753	2.95288	2.27657	1.88655	1.82611	1.25991
M2C		2100	1800	1500	1200	900	600	300	10	0	10	300	600	900	1200	1500	1800	2100		Legend
		0.875	1.22222	1		1	0.666667	0.666667	1	0	1	0.5	0.666667	0.4	1	1.5	1.11111	1.125
				1	0.583333	0.714286	0.5	0.75	0.8	0	0.8	1	0.833333	0.666667	0.428571	0.75	1
			0.714286	1.1	0.666667	2	1	1	1.5	0	1.5	1	2	1.66667	0.857143	1	0.875
		1.5	1.09091	1	0.916667	1.09091	1.18182	0.916667	1	0	1	1.09091	1	1.1	1
		1	0.9	0.666667	0.7	0.444444	0.857143	1.16667	0.857143	0	1	0.555556	1.16667
		1	0.75	0.625	0.666667	0.75	0.75	0.6	1	0	1	1.33333	0.75	2	0.8	0.5	0.545455	0
		0.333333	0.285714	0.5	1	2.5	2	2	1	0	1	1	0.5	1.66667	2	1.14286	0.75
GEOM		0.847609	0.753947	0.810202	0.741607	1.03804	0.907395	0.938583	1.00403	0	1.02639	0.878567	0.902086	1.0848	0.915235	0.915425	0.831605
average		1.09375	0.935483	0.898611	0.706667	0.99994	0.825938	0.85	1.02619	0	1.05	0.9133	1.06944	1.16667	0.817143	0.9375	0.882891	0.5625
stand		0.41625	0.329485	0.236731	0.163865	0.751639	0.496118	0.477302	0.226156	0	0.21492	0.296718	0.496349	0.631664	0.526444	0.38099	0.220144	0.795495
sem		0.208125	0.164742	0.118366	0.0819327	0.375819	0.248059	0.238651	0.113078	0	0.10746	0.148359	0.248175	0.315832	0.263222	0.190495	0.110072	0.397748
ERROR +		1.68011	1.41292	1.28366	1.06934	2.54132	1.89963	1.89319	1.45635	0	1.45623	1.472	1.89478	2.34813	1.96812	1.6774	1.27189	1.59099
CONTROL		2100	1800	1500	1200	900	600	300	10	0	10	300	600	900	1200	1500	1800	2100
control sd analyze			1.16667	1.07692	0.916667	0.916667	1	0.909091	1.5	0	1.5	0.916667	1.09091	1.07692	1	1.17647	0.75
		1.13333	0.764706	1.06667	1.25	0.928571	0.777778	0.809524	2.5	0	2.5	0.647059	1	1	1.35714	0.875	1.38462	2.14286
				0.846154	0.769231	0.846154	0.769231	0.916667	1	0	1	0.923077	0.928571	0.857143	1	0.6875	1	1.45455
				1	0.916667	0.909091	1	1	1	0	1	0.846154	1.18182	1.07692	0.916667	0.785714
				1.375	0.85	1.2	1	1.5	1	0	1	1	1.6	1.3	1	0.8	1.18	1.33
		0.818182	0.833333	1.4	1.16667	1	0.923077	0.75	1	0	1	1.26667	1.52941	1.5	1.21429	0.928571	1.11111	1.2
		1.42857	0.833333	1.09091	1	0.909091	0.846154	0.909091	1	0	1	1	0.916667	1.2
			0.909091	0.866667		0.52381	0.6875	1.25	1	0	1	0.888889	0.8125	1.25		0.586207	0.6
		1.5	0.833333	0.833333	1.09091	0.846154	0.785714	0.846154	1	0	1	0.928571	0.75	0.857143	1.16667	1.07692	1
				1.18182	1	1	1	1.1	1	0	1	1	1	0.916667	1.2
geomean		1.18727	0.881558	1.05709	0.985156	0.891352	0.871392	0.978264	1.14131	0	1.14131	0.930072	1.05048	1.08613	1.09815	0.845344	0.971526	1.49344
average		1.22002	0.890077	1.07375	0.995571	0.907954	0.878945	0.999053	1.2	0	1.2	0.941708	1.08099	1.10348	1.10685	0.864548	1.00368	1.53185
stdv		0.311379	0.142997	0.201975	0.153301	0.169294	0.11984	0.228136	0.483046	0	0.483046	0.154804	0.283962	0.209501	0.149697	0.194866	0.263021	0.420386
error		1.81003	1.16755	1.46104	1.29176	1.22994	1.11107	1.43454	2.1074	0	2.1074	1.23968	1.61841	1.50513	1.39754	1.23508	1.49757	2.33421
	value over 2stdv
