# Supplementary material for: CCR1 mediates Müller cell activation and photoreceptor cell death in macular and retinal degeneration
Source: eLife. 2023 Oct 30;12:e81208. doi: 10.7554/eLife.81208 (PMC10615370; doi:10.7554/eLife.81208)
Supplement: Figure 2—source data 1. [file elife-81208-fig2-data1.xlsx]

## Sheet: % of apoptotic cells with cells
		control	m1	m2a
ic10132		1.21	1.55	1.89
ic101611		4.64	8.23	20.59
6111		5.19	5.59	9.36			Legend
100591		1.23	2.13	1.47
a290		1.69	0.82	7.92
18h		0.65	1.5	7.24
				18.28
				18.26
	control	m1	m2a
average	2.435	3.30333	10.6262
stdv	1.95683	2.94519	7.52788
error	6.34866	9.19371	25.682
sem	0.798873	1.20237	2.66151
fold change	4.36396	3.21683

## Sheet: % of apoptotic cells with media
	control	m1	m2a
	3.02219	2.09068	2.91781			Legend
	2.00324	3.20737	3.11133
	2.51271	2.46437	3.1528
	2.32875	2.81784	3.00392
	2.43	2.49241	2.60295
	2.37938	2.37417	2.82037
	control	m1	m2a
average	2.44604	2.57447	2.93486
stdv	0.331942	0.388027	0.203454
error	3.10993	3.35053	3.34177
sem	0.135515	0.158411	0.0830598
