# Supplementary material for: CCR1 mediates Müller cell activation and photoreceptor cell death in macular and retinal degeneration
Source: eLife. 2023 Oct 30;12:e81208. doi: 10.7554/eLife.81208 (PMC10615370; doi:10.7554/eLife.81208)
Supplement: Figure 3—source data 1. [file elife-81208-fig3-data1.xlsx]

## Sheet: ros
ROS assay:10.8.17	1	2	3	4	5	6	7	8	9	10	11	12
IC101352																		average patient 1	average patient 2	average patient 3	average patient 4	average patient 5	average	ttestm2a	ttest m1/m0	st dev 1	st dev 2	st dev 3	st error 1	st error 2	st error 3
B	1142	1024	1025	52095	46823	44287	1321	1192	1217	1057	1040	1119				m2a+ROS substrate		47735	13270	42858.7	47126.7	26427.3	35483.5	0.00645508		3983.09	2118.73	16214.2	55701.2	17507.5	75287
C	1055	1037	1005	21402	24269	24318	21714	20694	18623	971	1012	1079				m1+ ROS substrate		23329.7	10034	19006	19826.3	17387	17916.6		0.924867	1669.59	937.528	1503.9	26668.8	11909.1	22013.8
D	1052	1029	1021	1001	1005	975	971	986	999	1016	1001	1108				m0 +ROS substrate		20343.7	11414.5	20301	20741.5	16357	17831.5	0.00761113		1575	1759.99	1607.96	23493.7	14934.5	23516.9
E	1447	987	1011	1021	969	954	988	990	970	985	1039	1109																	st error 1	st error 2	st error 3
F																													39768.8	9032.54	10430.3
G																													19990.5	8158.94	15998.2
H																													17193.7	7894.52	17085.1
ROS 17.08.17
<>	1	2	3	4	5	6	7	8	9	10	11	12
A																	m0	m1	m2a
IC100525	385	367	9581	11112	9409	12659	10170	377	391	367	397						20343.7	23329.7	47735
C	366	371	11022	13558	15230	455	423	375	370	361	382						11414.5	10034	13270		Legend
IC100333	388	372	17357	20302	19359	19164	21438	370	370	380	394						20301	19006	42858.7
E	390	367	52938	51483	24155	448	358	364	377	361	393						20741.5	19826.3	47126.7
F	380	362	364	382	387	369	379	366	390	382	392						16357	17387	26427.3
G
																stdv	4007.17	4913.02	15128.7
ROS 27.08.17																sem	1792.06	2197.17	6765.76
<>	1	2	3	4	5	6	7	8	9							average	17831.5	17916.6	35483.5
A																error(+)	25845.9	27742.6	65740.9
CIC101362			42940	45396	53044	19588	20367	19055	20057							error(-)	9817.2	8090.56	5226.15
			7790	14740	12991
B IC100197			23418	27317	28547	21895	18135	14599	19427
E			6974	9288	7962
F			16930	13330	18811
G
H

## Sheet: hne
	Label	Area	IntDen	intensity	average	average L	ratio right eye / left eye		date		m1		m2a		control
1	L 24.5.17 1.jpg	782085	4125617	3343532	3752870	7.04649e+06	1.00433			L1 9.8.16 1.jpg	1.59485	L2A 9.8.16.jpg	1.08293	L 24.5.17 1.jpg	1.00433
2	L 24.5.17 2.jpg	785624	4977456	4191832						L1 18.1.17 2.jpg	0.969551	L2A 18.1.17 2.jpg	4.38239	L 25.12.16 1.jpg	0.58574
3	L 24.5.17 3.jpg	792922	1113720	320798						L1 21.11.16. 2.jpg	3.38536	L2A 21.11.16 1.jpg	0.638268	L 27.3.17 2.jpg	0.922326
4	L 24.5.17 4.jpg	774996	7930314	7155318						L1 24.5.17 1.jpg	0.68814	L2A 24.5.17.jpg	1.64694	L27.2.17 1.jpg	0.819539
										L1 ON 1.jpg	0.194322	L2A 25.12.16 1.jpg	1.01506
5	L 25.12.16 1.jpg	850735	5632278	4781543	3.61132e+06		0.58574					L2A 16.6.16 2.jpg	1.58589
6	L 25.12.16 2.jpg	861074	4786634	3925560								L2A 19.9.16 2.jpg	0.12163
7	L 25.12.16 3.jpg	498013	2624875	2126862
8	L 27.3.17 2.jpg	816597	17007281	16190684	1.48731e+07		0.922326
9	L 27.3.17 3.jpg	834029	22056118	21222089
10	L 27.3.17.jpg	855091	8061757	7206666
						AVERAGE l1
11	L1 9.8.16 1.jpg	450599	12351994	11901395	8.30641e+06	5.43827e+06	1.59485
12	L1 9.8.16 2.jpg	448587	10472455	10023868
13	L1 9.8.16 3.jpg	449475	3443429	2993954							m1	m2a	control		Legend
										average	1.36645	1.49616	0.832984
14	L1 18.1.17 2.jpg	471630	9310928	8839298	7.47315e+06		0.969551
15	L1 18.1.17 3.jpg	492068	9551055	9058987						fold change	1.64042	1.79614
16	L1 18.1.17.jpg	249901	4771077	4521176						stdv	1.2369	1.37772	0.181339
										sem	0.553159	0.520728	0.0906696
17	L1 21.11.16. 2.jpg	813383	4374974	3561591	5280902		0.295389	3.38536		error (+)_	3.84025	4.25159	1.19566
18	L1 21.11.16.jpg	826160	7826373	7000213						errro (-)	-1.10736	-1.25928	0.470305
19	L1 24.5.17 1.jpg	570401	5004512	4434111	8.00773e+06		0.68814
20	L1 24.5.17 2.jpg	662702	2211626	1548924
21	L1 24.5.17 3.jpg	546273	6174648	5628375
22	L1 24.5.17 4.jpg	671426	21090925	20419499
23	L1 ON 1.jpg	516137	1982060	1465923	987636		0.194322
24	L1 ON 2.jpg	529602	1330924	801322
25	L1 ON 3.jpg	571772	1267436	695664
26	L2A 9.8.16.jpg	398808	11034652	10635844	10635844	average L2A	1.08293
						5.98015e+06
27	L2A 16.6.16 2.jpg	601340	2412213	1810873	1.68508e+06		1.58589
28	L2A 16.6.16.jpg	580506	2139800	1559294
29	L2A 18.1.17 2.jpg	574267	785113	210846	1.40953e+06		4.38239
30	L2A 18.1.17 3.jpg	613648	3455916	2842268
31	L2A 18.1.17 4.jpg	623696	3544984	2921288
32	L2A 18.1.17.jpg	468419	132134	-336285
33	L2A 19.9.16 2.jpg	694508	2924230	2229722	4.50278e+06		0.12163
34	L2A 19.9.16 3.jpg	716235	4719644	4003409
35	L2A 19.9.16.jpg	705245	7980458	7275213
36	L2A 21.11.16 1.jpg	673422	11363341	10689919	1.04088e+07		1.56674	0.638268
37	L2A 21.11.16 2.jpg	663913	10791661	10127748
38	L2A 24.5.17.jpg	626165	7386051	6759886	6759886		1.64694
39	L2A 25.12.16 1.jpg	877382	6260828	5383446	4101239		0.985163	1.01506
40	L2A 25.12.16 3.jpg	915913	4898604	3982691
41	L2A 25.12.16.jpg	833764	3771344	2937580
42	L2A ON 1.jpg	540668	6418821	5878153	7.36853e+06
43	L2A ON 2.jpg	656430	9515334	8858904
44	L27.2.17 1.jpg	807273	12492658	11685385	7.65675e+06		0.819539
45	L27.2.17 2.jpg	885772	9996385	9110613
46	L27.2.17 3.jpg	813464	2987708	2174244
						AVERAGE R
47	R 24.5.17 1.jpg	697165	7112669	6415504	3.76912e+06	7086453
48	R 24.5.17 2.jpg	726689	1512147	785458
49	R 24.5.17 3.jpg	678564	4784954	4106390
50	R 25.12.16 1.jpg	522036	2924313	2402277	2115295
51	R 25.12.16 2.jpg	825823	2654136	1828313
52	R 27.3.12 2.jpg	852227	15477707	14625480	13717894
53	R 27.3.12 3.jpg	869933	17114636	16244703
54	R 27.3.12 12.jpg	854086	11137585	10283499
						AVERAGE R1
55	R1 3ON 1.jpg	602667	1266234	663567	191919	6.84659e+06
56	R1 3ON 2.jpg	575049	655634	80585
57	R1 3ON 3.jpg	628825	460431	-168394
58	R1 9.8.16 2.jpg	520046	13963625	13443579	1.32475e+07
59	R1 9.8.16 3.jpg	454065	14085343	13631278
60	R1 9.8.16.jpg	707486	13375064	12667578
							#DIV/0!
61	R1 18.1.17 2.jpg	510392	6443120	5932728	7.2456e+06
62	R1 18.1.17 3.jpg	393761	5178845	4785084
63	R1 18.1.17.jpg	603697	11622692	11018995
64	R1 19.9.16 1.jpg	759868	19012514	18252646	9.52671e+06
65	R1 19.9.16 2.jpg	701910	9923233	9221323
66	R1 19.9.16 3.jpg	315380	1421527	1106147
67	R1 21.11.16 2.jpg	831734	1446781	615047	1.55992e+06
68	R1 21.11.16 3.jpg	864721	3762951	2898230
69	R1 21.11.16.jpg	792546	1959037	1166491
70	R1 24.5.17 1.jpg	629214	605697	-23517	5.51044e+06
71	R1 24.5.17 2.jpg	657886	7000731	6342845
72	R1 24.5.17 3.jpg	633906	9375577	8741671
73	R1 24.5.17 4.jpg	518448	7499202	6980754
						AVERAGE R2A
74	R2A 9.8.16 2.jpg	475416	22907624	22432208	1.15178e+07	6.64569e+06
75	R2A 9.8.16 3.jpg	479511	8898685	8419174
76	R2A 9.8.16.jpg	184399	3886491	3702092
77	R2A 16.6.16 1.jpg	623813	2483407	1859594	2.67236e+06
78	R2A 16.6.16 2.jpg	531456	4763588	4232132
79	R2A 16.6.16 3.jpg	492132	2417479	1925347
80	R2A 18.1.17 1.jpg	666221	7270876	6604655	6.1771e+06
81	R2A 18.1.17 2.jpg	626334	7980693	7354359
82	R2A 18.1.17 3.jpg	664492	6276102	5611610
83	R2A 18.1.17 4.jpg	635714	5773492	5137778
84	R2A 19.9.16 1.jpg	603148	719639	116491	547675
85	R2A 19.9.16 2.jpg	608617	1690145	1081528
86	R2A 19.9.16 3.jpg	647722	1092728	445006
87	R2A 21.11.16 1.jpg	643022	14701695	14058673	1.63079e+07
88	R2A 21.11.16 2.jpg	707628	19264802	18557174
89	R2A 24.5.17 1.jpg	793426	13977779	13184353	11133120
90	R2A 24.5.17 2.jpg	795931	13881997	13086066
91	R2A 24.5.17 3.jpg	793925	13571897	12777972
92	R2A 24.5.17.jpg	789403	6273492	5484089
93	R2A 25.12.16 1.jpg	565938	840579	274641	4040389
94	R2A 25.12.16 2.jpg	578405	8384542	7806137
95	R27.2.17.jpg	811915	7086917	6275002	6275002

## Sheet:  cd11b count
			r2a	r1
		onh3	22	0
		21.11.16	60	78
		25.12.17	83
		18.1.17	96	40
		9.8.16	53	33		Legend
		19.9.16	41	0
		24.5.17	60	0
			r2a	r1
		average	59.2857	25.1667
		stdv	24.7502	31.5368
		sem	9.35469	11.9198
		error (+)	108.786	88.2402
		errro (-)	9.78535	-37.9068

## Sheet: migration boyden chamber
migration assy
							WITHOUT 2STDV ERROR
	M1CELL INCUBATION	M2A CELL						M1CELL INCUBATION	M2A CELL
1	56682	31043					1		31043
2	22727	31496					2	22727	31496		Legend
3	16261	24441					3	16261	24441
4	15928	23681					4	15928	23681
5	21504	52406					5	21504	52406
6	33217	69174					6	33217	69174
AVERAGE	27719.8	38706.8					AVERAGE	21927.4	38706.8
STDV	14159.5	16612.9					STDV	6266.97	16612.9
ERROR	56038.8	71932.7					ERROR (+)	34461.3	71932.7
	-599.101	5480.98					ERROR (-)	9393.46	5480.98
							SEM	2802.67	6782.2
							fold	1.76523
