# Supplementary material for: CCR1 mediates Müller cell activation and photoreceptor cell death in macular and retinal degeneration
Source: eLife. 2023 Oct 30;12:e81208. doi: 10.7554/eLife.81208 (PMC10615370; doi:10.7554/eLife.81208)
Supplement: Figure 4—figure supplement 2—source data 1. [file elife-81208-fig4-figsupp2-data1.xlsx]

## Sheet: qPCR ccr2, ccr5
	Well	Fluor	Target	Content	Sample
							Cт	Cт Mean	ΔCт	ΔΔCT	2^(-ΔΔCT)																		ΔΔCт	2^(-ΔΔCT)
	A05	SYBR	mCCR2	Unkn-05	5		34.5664	32.5885	11.1021	-1.8979	3.72671
	B05	SYBR	mCCR2	Unkn-05	5		32.6175									GAPDH	Std-17	1	20.7676	20.8516	20.8516
	C05	SYBR	mCCR2	Unkn-05	5		32.5595									GAPDH	Std-17	1	20.7114	20.8516
	A06	SYBR	mCCR2	Unkn-06	6		36.2384	36.5393	11.6036	-1.39643	2.6325					GAPDH	Std-17	1	21.0757	20.8516
	B06	SYBR	mCCR2	Unkn-06	6		36.8401									GAPDH	Std-19	4	19.3647	19.4662	19.4662
	C06	SYBR	mCCR2	Unkn-06	6		37.4172									GAPDH	Std-19	4	19.2015	19.4662
	A07	SYBR	mCCR2	Unkn-07	7		40.9809	36.6861	10.4387	-2.56132	5.90247					GAPDH	Std-19	4	19.8323	19.4662							CCR2			CCR5			Legend
	B07	SYBR	mCCR2	Unkn-07	7		36.3861							D05	SYBR	GAPDH	Std-17	5		21.6553	21.4864					CONTROL	PHOTIC INJURY		CONTROL	PHOTIC INJURY
	C07	SYBR	mCCR2	Unkn-07	7		36.9861							E05	SYBR	GAPDH	Std-17	5		21.4067						0.0301651	3.72671		1.1745	3.15967
	A08	SYBR	mCCR2	Unkn-08	8		34.8995	35.2116	13.6001	0.600082	0.659716			F05	SYBR	GAPDH	Std-17	5		21.3972						0.285698	2.6325		1.76149	45.5084
	B08	SYBR	mCCR2	Unkn-08	8		35.5236							D06	SYBR	GAPDH	Std-18	6		25.0877	24.9357					0.540886	5.902		2.67204	59.92
	C08	SYBR	mCCR2	Unkn-08	8		34.0051							E06	SYBR	GAPDH	Std-18	6		24.7804						1.00107	0.659716		2.96246	8.74698
	A09	SYBR	mCCR2	Unkn-09	9		35.4331	35.1523	14.3007	1.30072	0.405923			F06	SYBR	GAPDH	Std-18	6		24.9391						1.21571	0.405923		3.86292	7.58188
	B09	SYBR	mCCR2	Unkn-09	9		34.8992							D07	SYBR	GAPDH	Std-19	7		26.2622	26.2475					0.168	0.778207		2.17853	3.9343
	C09	SYBR	mCCR2	Unkn-09	9		35.1246							E07	SYBR	GAPDH	Std-19	7		26.1602						0.24399			3.50026
	A10	SYBR	mCCR2	Unkn-10	10		36.2599							F07	SYBR	GAPDH	Std-19	7		26.32						1.3153			2.72037
	B10	SYBR	mCCR2	Unkn-10	10									D08	SYBR	GAPDH	Std-20	8		21.7785	21.6115					1.217			4.98181
	C10	SYBR	mCCR2	Unkn-10	10		40.5715							E08	SYBR	GAPDH	Std-20	8		21.5009
	A11	SYBR	mCCR2	Unkn-11	11		33.2178	32.828	13.3618	0.361774	0.778207			F08	SYBR	GAPDH	Std-20	8		21.555
	B11	SYBR	mCCR2	Unkn-11	11		33.1056
	C11	SYBR	mCCR2	Unkn-11	11		32.1605
	A12	SYBR	mCCR2	Unkn-12	12																				average	0.668647	2.35084		2.86826	21.4752
	B12	SYBR	mCCR2	Unkn-12	12		36.5357																		stdv	0.516025	2.1771		1.14535	24.7134
	C12	SYBR	mCCR2	Unkn-12	12																				sem	0.230773	0.973629		0.512216	1.91562
	control mice						Cт	Cт Mean	ΔCт	ΔΔCT	2^(-ΔΔCT)														error	1.7007	6.70504		5.15896
	A07	SYBR	ccr2	Unkn-13	1			38.1	15.5731	2.57305	0.168048			D07	SYBR	gapdh	Unkn-14	1		20.9295	20.7898
	B07	SYBR	ccr2	Unkn-13	1		36.3628	38.1026						E07	SYBR	gapdh	Unkn-14	1		20.6137	20.7898
	C07	SYBR	ccr2	Unkn-13	1		39.8424	38.1026						F07	SYBR	gapdh	Unkn-14	1		20.8261	20.7898
	A08	SYBR	ccr2	Unkn-15	2		36.3684	36.2922	15.0351	2.03511	0.24399			D08	SYBR	gapdh	Unkn-16	2		21.3085	21.2571
	B08	SYBR	ccr2	Unkn-15	2		34.9488	35.8444						E08	SYBR	gapdh	Unkn-16	2		21.1363	21.2571
	C08	SYBR	ccr2	Unkn-15	2		36.2161	35.8444						F08	SYBR	gapdh	Unkn-16	2		21.3265	21.2571
	A09	SYBR	ccr2	Unkn-17	3			0						D09	SYBR	gapdh	Unkn-18	3		26.1235	26.0834
	B09	SYBR	ccr2	Unkn-17	3			0						E09	SYBR	gapdh	Unkn-18	3		26.0021	26.0834
	C09	SYBR	ccr2	Unkn-17	3		34.4718	34.4718						F09	SYBR	gapdh	Unkn-18	3		26.1245	26.0834
	A10	SYBR	ccr2	Unkn-19	4			0						D10	SYBR	gapdh	Unkn-20	4		23.3135	23.136
	B10	SYBR	ccr2	Unkn-19	4			0						E10	SYBR	gapdh	Unkn-20	4		23.0269	23.136
	C10	SYBR	ccr2	Unkn-19	4			0						F10	SYBR	gapdh	Unkn-20	4		23.0675	23.136
	A11	SYBR	ccr2	Unkn-21	5		33.1347	33.2719	12.6046	-0.395396	1.3153			D11	SYBR	gapdh	Unkn-22	5		20.7495	20.6673
	B11	SYBR	ccr2	Unkn-21	5		33.0883	33.2719						E11	SYBR	gapdh	Unkn-22	5		20.4522	20.6673
	C11	SYBR	ccr2	Unkn-21	5		33.5928	33.2719						F11	SYBR	gapdh	Unkn-22	5		20.8002	20.6673
	A12	SYBR	ccr2	Unkn-23	6		36.5275	35.4635	12.7166	-0.283364	1.21703			D12	SYBR	gapdh	Unkn-24	6		23.8033	22.7469
	B12	SYBR	ccr2	Unkn-23	6			0						E12	SYBR	gapdh	Unkn-24	6		22.6265	23.099
	C12	SYBR	ccr2	Unkn-23	6		34.3995	35.4635						F12	SYBR	gapdh	Unkn-24	6		22.8672	23.099
	H05	SYBR	ccr2	NTC-02			40.6848	40.6848						H09	SYBR	gapdh	NTC-04				0
	H06	SYBR	ccr2	NTC-02				0						H10	SYBR	gapdh	NTC-04				0
							Cт	Cт Mean	ΔCт	ΔΔCT	2^(-ΔΔCT)
	A02	SYBR	mccr2	Unkn-01	2		32.4017	32.3929	12.9985	-0.00154743	1.00107			A08	SYBR	GAPDH	Unkn-14	2		19.4474	19.3944
	B02	SYBR	mccr2	Unkn-01	2		33.2349	32.6736						B08	SYBR	GAPDH	Unkn-14	2		19.4643	19.3944
	C02	SYBR	mccr2	Unkn-01	2		32.3841	32.6736						C08	SYBR	GAPDH	Unkn-14	2		19.2716	19.3944
	A03	SYBR	mccr2	Unkn-02	3		32.214	32.0347	12.7182	-0.281796	1.21571			A09	SYBR	GAPDH	Unkn-15	3		19.419	19.3165
	B03	SYBR	mccr2	Unkn-02	3		32.0875	32.0347						B09	SYBR	GAPDH	Unkn-15	3		19.2539	19.3165
	C03	SYBR	mccr2	Unkn-02	3		31.8027	32.0347						C09	SYBR	GAPDH	Unkn-15	3		19.2767	19.3165
	A04	SYBR	mccr2	Unkn-03	4		33.9768	36.3248	18.051	5.05097	0.0301651			A10	SYBR	GAPDH	Unkn-16	4		18.319	18.2738
	B04	SYBR	mccr2	Unkn-03	4		39.7057	36.3248						B10	SYBR	GAPDH	Unkn-16	4		18.2956	18.2738
	C04	SYBR	mccr2	Unkn-03	4		35.2919	36.3248						C10	SYBR	GAPDH	Unkn-16	4		18.2068	18.2738
	A05	SYBR	mccr2	Unkn-04	5		32.2975	32.4893	14.8074	1.80744	0.285698			A11	SYBR	GAPDH	Unkn-17	5		17.8494	17.6818
	B05	SYBR	mccr2	Unkn-04	5		32.5557	32.4893						B11	SYBR	GAPDH	Unkn-17	5		17.6165	17.6818
	C05	SYBR	mccr2	Unkn-04	5		32.6147	32.4893						C11	SYBR	GAPDH	Unkn-17	5		17.5796	17.6818
	A06	SYBR	mccr2	Unkn-05	6		32.4385	32.2602	13.8866	0.886605	0.540886			A12	SYBR	GAPDH	Unkn-18	6		18.3733	18.3736
	B06	SYBR	mccr2	Unkn-05	6		33.2465	32.589						B12	SYBR	GAPDH	Unkn-18	6		18.3531	18.3736
	C06	SYBR	mccr2	Unkn-05	6		32.0819	32.589						C12	SYBR	GAPDH	Unkn-18	6		18.3944	18.3736
	H01	SYBR	mccr2	NTC-14				0
	H02	SYBR	mccr2	NTC-14			39.5125	39.5125
					Cт		Cт Mean	(+0.5)	(-0.5)	ΔCт	ΔΔCT	2^(-ΔΔCT)
	SYBR	mCCR5		5	33.2142		32.8266	33.3266	32.3266	11.3402	-1.65977	3.15967			D05	SYBR	GAPDH	Std-17	5		21.6553	21.4864
	SYBR	mCCR5		5	32.3341										E05	SYBR	GAPDH	Std-17	5		21.4067
	SYBR	mCCR5		5	32.9316										F05	SYBR	GAPDH	Std-17	5		21.3972
	SYBR	mCCR5		6	32.4739		32.4277			7.49194	-5.50806	45.5084			D06	SYBR	GAPDH	Std-18	6		25.0877	24.9357
	SYBR	mCCR5		6	32.4404										E06	SYBR	GAPDH	Std-18	6		24.7804
	SYBR	mCCR5		6	32.3687										F06	SYBR	GAPDH	Std-18	6		24.9391
	SYBR	mCCR5		7	33.4519		33.3425			7.09503	-5.90497	59.92			D07	SYBR	GAPDH	Std-19	7		26.2622	26.2475
	SYBR	mCCR5		7	33.2876										E07	SYBR	GAPDH	Std-19	7		26.1602
	SYBR	mCCR5		7	33.288										F07	SYBR	GAPDH	Std-19	7		26.32
	SYBR	mCCR5		8	31.7452		31.4827			9.87122	-3.12878	8.74698			D08	SYBR	GAPDH	Std-20	8		21.7785	21.6115
	SYBR	mCCR5		8	31.3543										E08	SYBR	GAPDH	Std-20	8		21.5009
	SYBR	mCCR5		8	31.3486										F08	SYBR	GAPDH	Std-20	8		21.555
	SYBR	mCCR5		9	31.0232		30.929			10.0774	-2.92255	7.58188					GAPDH	Std-17	1	20.7676	20.8516	20.8516
	SYBR	mCCR5		9	30.7117												GAPDH	Std-17	1	20.7114	20.8516
	SYBR	mCCR5		9	31.0522												GAPDH	Std-17	1	21.0757	20.8516
	SYBR	mCCR5		11	30.3838		30.4901			11.0239	-1.97611	3.9343					GAPDH	Std-19	4	19.3647	19.4662	19.4662
	SYBR	mCCR5		11	30.6626												GAPDH	Std-19	4	19.2015	19.4662
	SYBR	mCCR5		11	30.4238												GAPDH	Std-19	4	19.8323	19.4662
	control mice						Cт	Cт Mean	ΔCт	ΔΔCT	2^(-ΔΔCT)
	D02	SYBR	mccr5	Unkn-06	3		30.9697	30.7497	11.4332	-1.5668	2.96246
	E02	SYBR	mccr5	Unkn-06	3		30.5869	30.7497
	F02	SYBR	mccr5	Unkn-06	3		30.6927	30.7497
	D03	SYBR	mccr5	Unkn-07	2		30.5339	30.4448	11.0503	-1.94969	3.86292
	E03	SYBR	mccr5	Unkn-07	2		30.3413	30.4448
	F03	SYBR	mccr5	Unkn-07	2		30.4591	30.4448
	D04	SYBR	mccr5	Unkn-08	4		30.6196	30.457	12.1832	-0.816794	1.76149
	E04	SYBR	mccr5	Unkn-08	4		29.8358	30.25
	F04	SYBR	mccr5	Unkn-08	4		30.2945	30.25
	D05	SYBR	mccr5	Unkn-09	5		30.5372	30.4498	12.7679	-0.23205	1.1745
	E05	SYBR	mccr5	Unkn-09	5		30.2614	30.4498
	F05	SYBR	mccr5	Unkn-09	5		30.5507	30.4498
	D06	SYBR	mccr5	Unkn-10	6		30.0793	29.9556	11.5821	-1.41794	2.67204
	E06	SYBR	mccr5	Unkn-10	6		29.7558	29.9556
	F06	SYBR	mccr5	Unkn-10	6		30.0318	29.9556
	H03	SYBR	mccr5	NTC-15				0
	H04	SYBR	mccr5	NTC-15				0
							Cт	Cт Mean	ΔCт	ΔΔCT	2^(-ΔΔCT)
	D01	SYBR	ccr5	Unkn-02	1		32.8671	32.6664	11.8766	-1.12335	2.17853
	E01	SYBR	ccr5	Unkn-02	1		32.5484	32.6664
	F01	SYBR	ccr5	Unkn-02	1		32.5838	32.6664
	D02	SYBR	ccr5	Unkn-04	2		32.5	32.4496	11.1925	-1.80746	3.50026
	E02	SYBR	ccr5	Unkn-04	2		32.3993	32.7241
	F02	SYBR	ccr5	Unkn-04	2		33.2729	32.7241
	D03	SYBR	ccr5	Unkn-06	3		36.0176	35.9972
	E03	SYBR	ccr5	Unkn-06	3		36.0078	35.9972
	F03	SYBR	ccr5	Unkn-06	3		35.9662	35.9972
	D04	SYBR	ccr5	Unkn-08	4		34.2404	34.2248	11.0888	-1.91118	3.76117
	E04	SYBR	ccr5	Unkn-08	4		34.0712	34.2248
	F04	SYBR	ccr5	Unkn-08	4		34.3627	34.2248
	D05	SYBR	ccr5	Unkn-10	5		32.3612	32.2235	11.5562	-1.4438	2.72037
	E05	SYBR	ccr5	Unkn-10	5		31.9994	32.2235
	F05	SYBR	ccr5	Unkn-10	5		32.31	32.2235
	D06	SYBR	ccr5	Unkn-12	6		33.8528	33.4302	10.6833	-2.31667	4.98181
	E06	SYBR	ccr5	Unkn-12	6		33.2017	33.4302
	F06	SYBR	ccr5	Unkn-12	6		33.2361	33.4302
	H07	SYBR	ccr2	NTC-03				0
	H08	SYBR	ccr2	NTC-03				0
