# Supplementary material for: CCR1 mediates Müller cell activation and photoreceptor cell death in macular and retinal degeneration
Source: eLife. 2023 Oct 30;12:e81208. doi: 10.7554/eLife.81208 (PMC10615370; doi:10.7554/eLife.81208)
Supplement: Figure 4—source data 1. [file elife-81208-fig4-data1.xlsx]

## Sheet: qPCR
Well	Sample Name	Target Name		Cт	Cт Mean	(+) 0.5	(-) 0.5	ΔCт	ΔΔCT																	ΔΔCт	2^(-ΔΔCT)			MCCR1			Legend
																														control	light damaged
A7	1	M CCR1	control 1	31.0489	30.9747	31.4747	30.4747	14.2831	0.175036			-4.97189	TRUE	1.95475	TRUE	3	12	1	84.2355				N	N	N	-0.556942	1.47115			1.47115	3.97084
B7	1	M CCR1	control 1	31.0639					0.235131			-6.24248	TRUE	1.95475	TRUE	3	10	1	84.2355				N	N	N					1.99519	4.65902
C7	1	M CCR1	control 1	30.8114					0.0648407			0	TRUE	0.0155652	TRUE	3	16	1	83.043				N	N	N					0.898609	3.3662
A8	2	M CCR1	control 2	32.5521	31.664	32.164	31.164	13.8435	0.0913373			1.65012	TRUE	0.0155652	TRUE	3	19	1	82.894				N	N	N	-0.996523	1.99519			0.973913	2.16568
B8	2	M CCR1	control 2	31.0491					0.0438043			-1.94828	TRUE	0.0155652	TRUE	3	13	1	82.7462				N	N	N					0.891149	2.7619
C8	2	M CCR1	control 2	31.3908					0.171448			-2.72411	TRUE	0.0155652	TRUE	3	14	1	82.4482				N	N	N					0.247342	1.26977
A9	3	M CCR1	mice 1.1	29.8421	29.6073	30.1073	29.1073	12.8506	0.104755			-4.22352	TRUE	0.0155652	TRUE	3	13	1	82.8942				N	N	N	-1.98944	3.97084				0.92878
B9	3	M CCR1	mice 1.1	29.7197					0.120264			-4.90991	TRUE	0.0155652	TRUE	3	13	1	82.8942				N	N	N						1.81044
C9	3	M CCR1	mice 1.1	29.2602					0.060719			0	TRUE	1.95475	TRUE	3	13	1	84.3864				N	N	N
A10	4	M CCR1	mice 1.2	31.2703	30.9856	31.4856	30.4856	12.62	0.0775592			-0.2827	TRUE	1.95475	TRUE	3	14	1	84.3864				N	N	N	-2.22003	4.65902
B10	4	M CCR1	mice 1.2	30.7976					0.0495043			-2.08361	TRUE	1.95475	TRUE	3	11	1	83.7927				N	N	N
C10	4	M CCR1	mice 1.2	30.8888					0.302766			-5.61945	TRUE	1.95475	TRUE	1	2	1	84.5377				N	Y	N
A11	5	M CCR1	mice 2.1	32.6308	33.1029	33.6029	32.6029	13.0889	0.235131			-6.24248	TRUE	1.95475	TRUE	3	9	1	84.5335				N	N	N	-1.75112	3.3662		Control	Light-damaged mice
B11	5	M CCR1	mice 2.1	33.2436	32.9372																									1.07956	2.61658
C11	5	M CCR1	mice 2.1	33.4342					0.0648407			0	TRUE	0.0155652	TRUE	3	16	1	83.192				N	N	N				error (+)	2.2674	5.24656
A12	6	M CCR1	mice 2.2	35.9712	34.4226	34.9226	33.9226	13.7252	0.0913373			1.65012	TRUE	0.0155652	TRUE	3	18	1	83.192				N	N	N	-1.11482	2.16568		error(-)	-0.108281	-0.0134027
B12	6	M CCR1	mice 2.2	33.3214	33.6483				0.0438043			-1.94828	TRUE	0.0155652	TRUE	3	12	1	83.1931				N	N	N				stdv	0.593919	1.31499
C12	6	M CCR1	mice 2.2	33.9753					0.171448			-2.72411	TRUE	0.0155652	TRUE	3	13	1	82.5972				N	N	N				sem	0.242467	0.536843
H7		M CCR1	NTC	Undetermined					0.104755			-4.22352	TRUE	0.0155652	TRUE	3	13	1	83.1922				N	N	N
H8		M CCR1	NTC	Undetermined					0.120264			-4.90991	TRUE	0.0155652	TRUE	3	13	1	83.1922				N	N	N
A1	1	M GAPDH	control 1	16.7419	16.6917	17.1917	16.1917		0.060719			0	TRUE	1.95475	TRUE	3	13	1	84.3864				N	N	N
B1	1	M GAPDH	control 1	16.6704					0.0775592			-0.2827	TRUE	1.95475	TRUE	3	13	1	84.3864				N	N	N
C1	1	M GAPDH	control 1	16.6627					0.0495043			-2.08361	TRUE	1.95475	TRUE	3	10	1	83.4947				N	N	N
A2	2	M GAPDH	control 2	17.9333	17.8205	18.3205	17.3205		0.302766			-5.61945	TRUE	1.95475	TRUE	1	2	1	84.6867				N	Y	N
B2	2	M GAPDH	control 2	17.767					0.175036			-4.97189	TRUE	1.95475	TRUE	3	10	1	84.5335				N	N	N
C2	2	M GAPDH	control 2	17.7612					0.235131			-6.24248	TRUE	1.95475	TRUE	3	8	1	84.6824				N	N	N
A3	3	M GAPDH	mice 1.1	16.764	16.7568	17.2568	16.2568		0.0648407			0	TRUE	0.0155652	TRUE	3	16	1	83.192				N	N	N
B3	3	M GAPDH	mice 1.1	16.758					0.0913373			1.65012	TRUE	0.0155652	TRUE	3	19	1	83.192				N	N	N
C3	3	M GAPDH	mice 1.1	16.7484					0.0438043			-1.94828	TRUE	0.0155652	TRUE	3	10	1	83.1931				N	N	N
A4	4	M GAPDH	mice 1.2	18.3708	18.3656	18.8656	17.8656		0.171448			-2.72411	TRUE	0.0155652	TRUE	3	11	1	82.5972				N	N	N
B4	4	M GAPDH	mice 1.2	18.3097					0.104755			-4.22352	TRUE	0.0155652	TRUE	3	14	1	83.1922				N	N	N
C4	4	M GAPDH	mice 1.2	18.4163					0.120264			-4.90991	TRUE	0.0155652	TRUE	3	13	1	83.0432				N	N	N
A5	5	M GAPDH	mice 2.1	19.9314	19.8483	20.3483	19.3483						TRUE	0.0155652	TRUE	3	35	1	74.8508				N	N	N
B5	5	M GAPDH	mice 2.1	19.7398									TRUE	0.0155652	TRUE	3	37	1	74.7018	61.5903			N	N	Y
C5	5	M GAPDH	mice 2.1	19.8738									TRUE	1.95475	TRUE	3	26	1	74.2562	84.6867			Y	N	Y
A6	6	M GAPDH	mice 2.2	19.8946	19.9232	20.4232	19.4232						TRUE	1.95475	TRUE	3	25	1	74.5519	84.8314			Y	N	Y
B6	6	M GAPDH	mice 2.2	19.9414									TRUE	1.65554	TRUE	3	26	1	74.1041				Y	N	N
C6	6	M GAPDH	mice 2.2	19.9334									TRUE	1.65554	TRUE	3	27	1	74.402				Y	N	N
H10		M GAPDH	NTC	Undetermined									TRUE	1.47929	TRUE	3	41	1	66.0591	61.1424			N	N	Y
H11		M GAPDH	NTC	Undetermined									TRUE	1.47929	TRUE	3	41	1	67.2515				N	N	N
Analysis Type	Singleplex
Endogenous Control	M GAPDH
RQ Min/Max Confidence Level	95.0
Reference Sample	1
Well	Sample Name	Target Name	Cт	Cт Mean	(+) 0.5	(-) 0.5	ΔCт	ΔΔCT																	ΔΔCт	2^(-ΔΔCT)
B11		mccr1	Undetermined									relative to 13
B12		mccr1	Undetermined												control	ld	1	control 1
A1	Sample 1	mccr1	33.8095	33.9584	34.4584	33.4584	15.9942	0.154234	0.898609	1.71423	0.304764	2.99423	0.125501	1	0.996298	2.7619	2	control 2								0.898609	control 1
B1	Sample 1	mccr1	34.8827
C1	Sample 1	mccr1	34.1073
A2	Sample 2	mccr1	33.8666	33.9702	34.4702	33.4702	15.8781	0.0381357	0.973913	1.59814	0.330304	2.87814	0.136018	4	0.247342	1.81044	5	LD 1								0.973913	control 2
B2	Sample 2	mccr1	34.0738
C2	Sample 2	mccr1	33.0628														7	LD 3
A3	Sample 3	mccr1	34.8975	33.9367	34.4367	33.4367	16.0063	0.166262	0.891149	1.72626	0.302234	3.00626	0.124459				8	LD 4								0.891149	control 3
B3	Sample 3	mccr1	33.6959
C3	Sample 3	mccr1	34.1775												0.337896	0.936701
A4	Sample 4	mccr1	34.4556	34.478	34.978	33.978	17.8554	2.01542	0.247342	3.57542	0.0838862	4.85542	0.034544		0.330304	0.430642										0.247342	control 4
B4	Sample 4	mccr1	34.5004
C4	Sample 4	mccr1	35.8083												0.0838862	0.614013
A5	Sample 5	mccr1	30.9069	30.8909	31.3909	30.3909	14.3743	-1.46566	2.7619	0.0943394	0.936701	1.37434	0.385729			0.342364										2.7619	LD 1
B5	Sample 5	mccr1	30.8998
C5	Sample 5	mccr1	30.8661
A6	Sample 6	mccr1	31.9565	32.1755	32.6755	31.6755	15.4954	-0.344562	1.26977	1.21544	0.430642	2.49544	0.177337													1.26977	LD 2
B6	Sample 6	mccr1	32.2664
C6	Sample 6	mccr1	32.3036
A7	Sample 7	mccr1	33.5957	33.2548	33.7548	32.7548	15.9466	0.10659	0.92878	1.66659	0.314997	2.94659	0.129714													0.92878	LD 3
B7	Sample 7	mccr1	32.9138
C7	Sample 7	mccr1	32.044
A8	Sample 8	mccr1	33.6283	33.6283	34.1283	33.1283	14.9837	-0.85634	1.81044	0.70366	0.614013	1.98366	0.252848													1.81044	LD 4
B8	Sample 8	mccr1	Undetermined
C8	Sample 8	mccr1	34.3876
C11		mgapdh	Undetermined
C12		mgapdh	Undetermined
D1	Sample 1	mgapdh	17.946	17.9641	18.4641	17.4641
E1	Sample 1	mgapdh	18.013
F1	Sample 1	mgapdh	17.9334
D2	Sample 2	mgapdh	18.0524	18.0921	18.5921	17.5921
E2	Sample 2	mgapdh	18.1205
F2	Sample 2	mgapdh	18.1033
D3	Sample 3	mgapdh	17.8953	17.9304	18.4304	17.4304
E3	Sample 3	mgapdh	17.9715
F3	Sample 3	mgapdh	17.9245
D4	Sample 4	mgapdh	16.6144	16.6226	17.1226	16.1226
E4	Sample 4	mgapdh	16.6252
F4	Sample 4	mgapdh	16.6282
D5	Sample 5	mgapdh	16.5076	16.5166	17.0166	16.0166
E5	Sample 5	mgapdh	16.5224
F5	Sample 5	mgapdh	16.5197
D6	Sample 6	mgapdh	16.693	16.6801	17.1801	16.1801
E6	Sample 6	mgapdh	16.676
F6	Sample 6	mgapdh	16.6713
D7	Sample 7	mgapdh	17.2797	17.3082	17.8082	16.8082
E7	Sample 7	mgapdh	17.3151
F7	Sample 7	mgapdh	17.3298
D8	Sample 8	mgapdh	18.6181	18.6447	19.1447	18.1447
E8	Sample 8	mgapdh	18.5578
F8	Sample 8	mgapdh	18.7581

## Sheet: correlation erg and CCR1 
MICE1.1	0.0006	0.0025	0.01	0.04	0.16	0.63
R2	169	186	202	209	213	200
L2	179	197	219	210	226	196
	0.944134	0.944162	0.922374	0.995238	0.942478	1.02041
MICE1.2	0.0006	0.0025	0.01	0.04	0.16	0.63
R	47	70		82	79	87
L	83	119		132	133	146
	0.566265	0.588235		0.621212	0.593985	0.59589
control	0.0006	0.0025	0.01	0.04	0.16	0.63
	216	246	261	249	281	287
	262	288	303	312	370	379
	1.21296	1.17073	1.16092	1.25301	1.31673	1.32056							Legend
										0.4 ERG	CCR1 rt
MICE 2.1	0.0006	0.0025	0.01	0.04	0.16	0.63	2.5			209.5	2.69343
R1	79	117	158	109	140	130	147			107	3.16023
L1	97	99	113	103	121	93	98			106	2.2833
	0.814433	1.18182	1.39823	1.05825	1.15702	1.39785	1.5			212	1.81
										250	1.59
MICE 2.2	0.0006	0.0025	0.01	0.04	0.16	0.63	2.5			293.5	1.46898
R1.1	318	388	412	397	409	423				333.5	0.936701
L1.1	125	175	189	190	215	230				382.5	0.430642
		2.21714	2.17989	2.08947	1.90233	1.83913				471.5	0.314997
total average	0.884449	1.22042	1.41535	1.20344	1.18251	1.23477
I did light damage (31.10.17) to add 4 mice for CCR expression in retina
mice 1	0.0006	0.0025	0.01	0.04	0.16	0.63
r	192	220	239	287	304
l	264	282	308	380	398
	0.727273	0.780142	0.775974	0.755263	0.763819
mice 2
r	261	329	580	370	381
l	266	321	693	395	415
	0.981203	1.02492	0.836941	0.936709	0.918072
mice 3
r	388	455	479	429	549
l	396	465	515	514	566
	0.979798	0.978495	0.930097	0.83463	0.969965
mice 4
r	201	240	224	300	344
l	77	94	97	124	144
	2.61039	2.55319	2.30928	2.41935	2.38889
