# Supplementary material for: CCR1 mediates Müller cell activation and photoreceptor cell death in macular and retinal degeneration
Source: eLife. 2023 Oct 30;12:e81208. doi: 10.7554/eLife.81208 (PMC10615370; doi:10.7554/eLife.81208)
Supplement: Figure 5—source data 1. [file elife-81208-fig5-data1.xlsx]

## Sheet: qPCR ccr1 rd10 mice
	Well	Fluor	Target	Content	Sample	Biological Set Name	Cq							Set Point	Well Note
						Cт Mean		Cт mean	ΔCт	ΔΔCT	2^(-ΔΔCT)
	H05	SYBR	GAPDH	NTC				0				Legend
	H06	SYBR	GAPDH	NTC				0
	E01	SYBR	GAPDH	Std-12	1		18.7085	18.7367
	F01	SYBR	GAPDH	Std-12	1		18.946	18.7367
	G01	SYBR	GAPDH	Std-12	1		18.5556	18.7367
	E10	SYBR	GAPDH	Std-21	10		18.3612	18.4167
	F10	SYBR	GAPDH	Std-21	10		18.4146	18.4167
	G10	SYBR	GAPDH	Std-21	10		18.4742	18.4167
	E11	SYBR	GAPDH	Std-22	11		18.7327	18.884
	F11	SYBR	GAPDH	Std-22	11		18.8162	18.884
	G11	SYBR	GAPDH	Std-22	11		19.103	18.884
	E02	SYBR	GAPDH	Std-13	2		17.5749	17.5956
	F02	SYBR	GAPDH	Std-13	2		17.7518	17.5956
	G02	SYBR	GAPDH	Std-13	2		17.4601	17.5956
	E03	SYBR	GAPDH	Std-14	3		17.1507	17.156
	F03	SYBR	GAPDH	Std-14	3		17.2209	17.156
	G03	SYBR	GAPDH	Std-14	3		17.0964	17.156
	E04	SYBR	GAPDH	Std-15	4		18.3418	18.364
	F04	SYBR	GAPDH	Std-15	4		18.4761	18.364
	G04	SYBR	GAPDH	Std-15	4		18.2742	18.364
	E05	SYBR	GAPDH	Std-16	5		18.6584	18.6523
	F05	SYBR	GAPDH	Std-16	5		18.7407	18.6523
	G05	SYBR	GAPDH	Std-16	5		18.5577	18.6523
	E06	SYBR	GAPDH	Std-17	6		18.9013	18.9356
	F06	SYBR	GAPDH	Std-17	6		19.0241	18.9356
	G06	SYBR	GAPDH	Std-17	6		18.8816	18.9356
	E07	SYBR	GAPDH	Std-18	7		25.4661	25.426
	F07	SYBR	GAPDH	Std-18	7		25.512	25.426
	G07	SYBR	GAPDH	Std-18	7		25.2998	25.426
	E08	SYBR	GAPDH	Std-19	8		17.8022	17.926
	F08	SYBR	GAPDH	Std-19	8		17.979	17.926
	G08	SYBR	GAPDH	Std-19	8		17.9969	17.926
	E09	SYBR	GAPDH	Std-20	9		17.7048	17.7427
	F09	SYBR	GAPDH	Std-20	9		17.7294	17.7427
	G09	SYBR	GAPDH	Std-20	9		17.7939	17.7427										1week rd10	3 week rd10	6 weeks rd10
	H03	SYBR	mCCR1	NTC				0										1.00344	2.27706	1.60323
	H04	SYBR	mCCR1	NTC				0										0.967647	0.487962	0.640405
	B01	SYBR	mCCR1	Unkn-01	1		30.8847	30.5495	11.8128	-1.18717	2.27706	3 week -5						0.874121	2.40115	2.4224
	C01	SYBR	mCCR1	Unkn-01	1		30.2895	30.5495										0.148883	3.83203	3.89652
	D01	SYBR	mCCR1	Unkn-01	1		30.4745	30.5495										0.566891	2.12011	2.04909
	B10	SYBR	mCCR1	Unkn-10	10		31.6292	31.4117	12.995	-0.00495444	1.00344	1 weekL2						0.31609	3.39096	0.33521
	C10	SYBR	mCCR1	Unkn-10	10		31.3715	31.4117											1.29908	1.42071
	D10	SYBR	mCCR1	Unkn-10	10		31.2344	31.4117												2.32594
	B11	SYBR	mCCR1	Unkn-11	11		32.9858	32.9191	14.0352	1.03516	0.487962	3week-6
	C11	SYBR	mCCR1	Unkn-11	11		32.7524	32.9191										1week rd10	3 week rd10	6 weeks rd10
	D11	SYBR	mCCR1	Unkn-11	11		33.0191	32.9191									average	0.646179	2.25834	1.83669
	B02	SYBR	mCCR1	Unkn-02	2		29.6098	29.3319	11.7363	-1.26373	2.40115	3week-7					stdv	0.3593	1.14409	1.12017
	C02	SYBR	mCCR1	Unkn-02	2		29.2317	29.3319									sem	0.17965	0.467072	0.396041
	D02	SYBR	mCCR1	Unkn-02	2		29.1541	29.3319												4.07704
	B03	SYBR	mCCR1	Unkn-03	3		29.1428	28.2179	11.0619	-1.93811	3.83203	3week-3								-0.403659
	C03	SYBR	mCCR1	Unkn-03	3		28.2433	28.5262
	D03	SYBR	mCCR1	Unkn-03	3		28.1924	28.5262
	B04	SYBR	mCCR1	Unkn-04	4		30.4645	30.2799	11.9159	-1.08414	2.12011	3 week-2
	C04	SYBR	mCCR1	Unkn-04	4		30.1367	30.2799
	D04	SYBR	mCCR1	Unkn-04	4		30.2385	30.2799
	B05	SYBR	mCCR1	Unkn-05	5		31.7509	31.6997	13.0474	0.0474472	0.967647	1 week L1
	C05	SYBR	mCCR1	Unkn-05	5		31.7297	31.6997
	D05	SYBR	mCCR1	Unkn-05	5		31.6185	31.6997
	B06	SYBR	mCCR1	Unkn-06	6		32.2677	32.1297	13.1941	0.194095	0.874121	1 week R2
	C06	SYBR	mCCR1	Unkn-06	6		32.3464	32.1297
	D06	SYBR	mCCR1	Unkn-06	6		31.775	32.1297
	B07	SYBR	mCCR1	Unkn-07	7		37.2518	36.6643	11.2383	-1.76169	3.39096	3 week 1
	C07	SYBR	mCCR1	Unkn-07	7		38.1386	37.1557
	D07	SYBR	mCCR1	Unkn-07	7		36.0768	37.1557
	B08	SYBR	mCCR1	Unkn-08	8		34.0428	33.6738	15.7478	2.74775	0.148883	1 week r1
	C08	SYBR	mCCR1	Unkn-08	8		33.3047
	D08	SYBR	mCCR1	Unkn-08	8		32.3724	33.24
	B09	SYBR	mCCR1	Unkn-09	9		30.6724	30.3652	12.6225	-0.377491	1.29908	3 week-8
	C09	SYBR	mCCR1	Unkn-09	9		30.3586	30.3652
	D09	SYBR	mCCR1	Unkn-09	9		30.0645	30.3652
	I repeat real time on another 2 mice 1 week old rd10 mice
														60
														60
														60
	A04	SYBR	ccr1	rd10-1 week 6	4		37.0391	37.0391	13.8189	0.818857	0.566891			60
	B04	SYBR	ccr1		4			0						60
	C04	SYBR	ccr1		4			0						60
	A05	SYBR	ccr1	rd10-1 week 7	5			0						60
	B05	SYBR	ccr1		5			0						60
	C05	SYBR	ccr1		5			0						60
	A06	SYBR	ccr1	rd10-1 week 8	6		37.3363	36.1923	14.6616	1.66159	0.31609			60
	B06	SYBR	ccr1		6		35.0483	35.3557						60
	C06	SYBR	ccr1		6		33.6827	35.3557						60
	D10	SYBR	mGAPDH	rd10-1 week 6	4		23.5563	23.2202
	E10	SYBR	mGAPDH		4		23.0273	23.2202
	F10	SYBR	mGAPDH		4		23.0771	23.2202
	D11	SYBR	mGAPDH	rd10-1 week 7	5		24.1977	23.4061
	E11	SYBR	mGAPDH		5		23.4141	23.6699
	F11	SYBR	mGAPDH		5		23.398	23.6699
	D12	SYBR	mGAPDH	rd10-1 week 8	6		21.7045	21.5307
	E12	SYBR	mGAPDH		6		21.3712	21.5307
	F12	SYBR	mGAPDH		6		21.5162	21.5307
	D10	SYBR	mCCR1	NTC				0						60
	D11	SYBR	mCCR1	NTC				0						60
	A01	SYBR	mCCR1	Unkn-01	1		34.2988	34.5298			12.319	-0.680985	1.60323	60		rd10 6 week-1
	B01	SYBR	mCCR1	Unkn-01	1		32.5862	33.882						60
	C01	SYBR	mCCR1	Unkn-01	1		34.7608	33.882						60
	A02	SYBR	mCCR1	Unkn-02	2		35.9432	35.7907			13.6429	0.642944	0.640405	60		rd10 6 week-2
	B02	SYBR	mCCR1	Unkn-02	2		37.5493	36.3769						60
	C02	SYBR	mCCR1	Unkn-02	2		35.6383	36.3769						60
	A03	SYBR	mCCR1	Unkn-03	3		34.6498	34.5717	34.5596	33.5596	11.7236	-1.27644	2.4224	60		rd10 6 week-3
	B03	SYBR	mCCR1	Unkn-03	3		33.0353	34.0596						60
	C03	SYBR	mCCR1	Unkn-03	3		34.4937	34.0596						60
	A04	SYBR	mCCR1	Unkn-04	4		36.729	36.729			11.0378	-1.96219	3.89652	60		rd10 6 week-4
	B04	SYBR	mCCR1	Unkn-04	4			0						60
	C04	SYBR	mCCR1	Unkn-04	4			0						60
	A05	SYBR	mCCR1	Unkn-05	5		33.1846	33.578			11.965	-1.03498	2.04909	60		rd10 6 week-5
	B05	SYBR	mCCR1	Unkn-05	5		37.0711	34.7424						60
	C05	SYBR	mCCR1	Unkn-05	5		33.9715	34.7424						60
	A06	SYBR	mCCR1	Unkn-06	6		36.8727	36.8967			14.5769	1.57686	0.33521	60		rd10 6 week-6
	B06	SYBR	mCCR1	Unkn-06	6		36.9206	36.8967						60
	C06	SYBR	mCCR1	Unkn-06	6			0						60
	A07	SYBR	mCCR1	Unkn-07	7		33.8168	34.1085	34.2979	33.6085	12.4934	-0.506613	1.42071	60		rd10 6 week-7
	B07	SYBR	mCCR1	Unkn-07	7		33.1767	33.7979						60
	C07	SYBR	mCCR1	Unkn-07	7		34.4001	33.7979						60
	A08	SYBR	mCCR1	Unkn-08	8		32.4639	32.5887			11.7822	-1.21781	2.32594	60		rd10 6 week-8
	B08	SYBR	mCCR1	Unkn-08	8		32.7827	32.5887
	C08	SYBR	mCCR1	Unkn-08	8		32.5194	32.5887
	SYBR	GAPDH	NTC				0
	SYBR	GAPDH	NTC				0
	SYBR	GAPDH	Unkn-13	1		22.1578	22.2108
	SYBR	GAPDH	Unkn-13	1		22.1904
	SYBR	GAPDH	Unkn-13	1		22.2843
	SYBR	GAPDH	Unkn-14	2		22.2438	22.1478
	SYBR	GAPDH	Unkn-14	2		22.1913
	SYBR	GAPDH	Unkn-14	2		22.0083
	SYBR	GAPDH	Unkn-15	3		22.7983	22.8482
	SYBR	GAPDH	Unkn-15	3		22.9453
	SYBR	GAPDH	Unkn-15	3		22.8009
	SYBR	GAPDH	Unkn-16	4		25.8223	25.6912
	SYBR	GAPDH	Unkn-16	4		25.7301
	SYBR	GAPDH	Unkn-16	4		25.521
	SYBR	GAPDH	Unkn-17	5		21.7632	21.613
	SYBR	GAPDH	Unkn-17	5		21.608
	SYBR	GAPDH	Unkn-17	5		21.4678
	SYBR	GAPDH	Unkn-18	6		22.4423	22.3198
	SYBR	GAPDH	Unkn-18	6		22.3854
	SYBR	GAPDH	Unkn-18	6		22.1318
	SYBR	GAPDH	Unkn-19	7		21.7495	21.6151
	SYBR	GAPDH	Unkn-19	7		21.6433
	SYBR	GAPDH	Unkn-19	7		21.4524
	SYBR	GAPDH	Unkn-20	8		20.9035	20.8065
	SYBR	GAPDH	Unkn-20	8		20.8378
	SYBR	GAPDH	Unkn-20	8		20.6783

## Sheet: qPCR ccr2, ccr5 rd10 mice
	Well	Fluor	Target	Content	Sample	Biological Set Name	Cq	Cq Mean	Cq Std. Dev	Starting Quantity (SQ)	Log Starting Quantity	SQ Mean	SQ Std. Dev	Set Point	Well Note
							Cт	Cт mean	(+0.5)							(-0.5)		ΔCт	ΔΔCT	2^(-ΔΔCT)
	H03	SYBR	mccr2	NTC				0																			CCR2
	H04	SYBR	mccr2	NTC			37.9843	37.9843															1WEEK	3 WEEK			1WEEK	3 WEEK		Legend
	A01	SYBR	mccr2	Unkn-01	1		31.2066	30.9329	31.4329							30.4329		12.1962	-0.803806	1.7457	3 week -5		0.468232	1.7457			0.468232	1.7457
	B01	SYBR	mccr2	Unkn-01	1		30.5422	30.9329															0.236988	0.619826			0.236988	0.619826
	C01	SYBR	mccr2	Unkn-01	1		31.0499	30.9329															0.408818	1.16242			0.408818	1.16242
	A10	SYBR	mccr2	Unkn-10	10		32.13	32.5114	33.0114							32.0114		14.0947	1.0947	0.468232	1 weekL2		0.294466	1.88072			0.294466	1.88072
	B10	SYBR	mccr2	Unkn-10	10		32.5629	32.5114																2.0688				2.0688
	C10	SYBR	mccr2	Unkn-10	10		32.8412	32.5114																17.5404				0.831439
	A11	SYBR	mccr2	Unkn-11	11		32.7303	32.574	33.074							32.074		13.6901	0.690066	0.619826	3week-6			0.831439
	B11	SYBR	mccr2	Unkn-11	11		32.6536	32.574																			1WEEK	3 WEEK
	C11	SYBR	mccr2	Unkn-11	11		32.3381	32.574														AVERAGE	0.352126	3.69275		AVERAGE	0.352126	1.38482
	A02	SYBR	mccr2	Unkn-02	2		30.7605	30.3785	30.8785							29.8785		12.7829	-0.217126	1.16242	3week-7	STDV	0.105319	6.13054		STDV	0.105319	0.597476
	B02	SYBR	mccr2	Unkn-02	2		30.3041	30.3785														SEM	0.0526593	2.50278		SEM	0.0526593	0.243918
	C02	SYBR	mccr2	Unkn-02	2		30.0709	30.3785														error (+)	0.562763	15.9538
	A03	SYBR	mccr2	Unkn-03	3		29.712	29.2447	29.7447							28.7447		12.0887	-0.911284	1.88072	3week-3
	B03	SYBR	mccr2	Unkn-03	3		29.2497	29.2447
	C03	SYBR	mccr2	Unkn-03	3		28.7724	29.2447
	A04	SYBR	mccr2	Unkn-04	4		30.6634	30.0592	30.5592							29.5592		11.9512	-1.04879	2.0688	3 week-2
	B04	SYBR	mccr2	Unkn-04	4		29.9671	30.3152
	C04	SYBR	mccr2	Unkn-04	4		29.5471	30.0592
	A05	SYBR	mccr2	Unkn-05	5		34.1713	33.7294	34.2294							33.2294		15.0771	2.07711	0.236988	1 week L1
	B05	SYBR	mccr2	Unkn-05	5		33.7109	33.7294
	C05	SYBR	mccr2	Unkn-05	5		33.3059	33.7294
	A06	SYBR	mccr2	Unkn-06	6		34.1186	33.5236	34.0236							33.0236		14.2905	1.29047	0.408818	1 week R2
	B06	SYBR	mccr2	Unkn-06	6		33.3717	33.2261
	C06	SYBR	mccr2	Unkn-06	6		33.0805	33.5236
	A07	SYBR	mccr2	Unkn-07	7		34.4719	34.2934	34.7934							33.7934		8.86739	-4.13261	17.5404	3 week 1
	B07	SYBR	mccr2	Unkn-07	7		34.3531	34.2934
	C07	SYBR	mccr2	Unkn-07	7		34.0551	34.2934
	A08	SYBR	mccr2	Unkn-08	8		32.8291	32.6899	33.1899							32.1899		14.7638	1.76383	0.294466	1 week r1
	B08	SYBR	mccr2	Unkn-08	8		32.544	32.6899
	C08	SYBR	mccr2	Unkn-08	8		32.6965	32.6899
	A09	SYBR	mccr2	Unkn-09	9		31.3212	31.009	31.509							30.509		13.2663	0.266318	0.831439	3 week-8
	B09	SYBR	mccr2	Unkn-09	9		30.9634	31.009
	C09	SYBR	mccr2	Unkn-09	9		30.7423	31.009
	H05	SYBR	mccr5	NTC				0
	H06	SYBR	mccr5	NTC				0																			CCR5
	D01	SYBR	mccr5	Unkn-12	1		29.4034	29.4197										10.683	-2.31704	4.98309	3 week -5						1WEEK	3 WEEK
	E01	SYBR	mccr5	Unkn-12	1		29.2603	29.4197																			2.10866	4.98309
	F01	SYBR	mccr5	Unkn-12	1		29.5954	29.4197																			2.05111	3.86902
	D12	SYBR	mccr5	Unkn-22	10		30.4927	30.3403										11.9237	-1.07632	2.10866	1 weekL2						2.60116	3.92669
	E12	SYBR	mccr5	Unkn-22	10		30.2431	30.3403																			2.51682	5.26072
	F12	SYBR	mccr5	Unkn-22	10		30.2852	30.3403																				5.69624
	D11	SYBR	mccr5	Unkn-21	11		30.0805	29.932										11.048	-1.95197	3.86902	3week-6							27.0391
	E11	SYBR	mccr5	Unkn-21	11		30.0046	29.932																				3.10318
	F11	SYBR	mccr5	Unkn-21	11		29.7108	29.932																			1WEEK	3 WEEK		1week rd10	3 week rd10	1WEEK	3 WEEK
	D02	SYBR	mccr5	Unkn-13	2		28.6159	28.6223										11.0267	-1.97331	3.92669	3week-7					AVERAGE	2.31944	7.69686		0.748523	2.25834	0.352126	1.38482
	E02	SYBR	mccr5	Unkn-13	2		28.6043	28.6223																		STDV	0.279735	8.57702		0.403461	1.14409	0.105319	0.597476
	F02	SYBR	mccr5	Unkn-13	2		28.6467	28.6223																		SEM	0.139867	3.50155		0.20173	0.467072	0.0526593	0.243918
	D03	SYBR	mccr5	Unkn-14	3		27.806	27.7607										10.6047	-2.39526	5.26072	3week-3					error (+)	2.87891	24.8509
	E03	SYBR	mccr5	Unkn-14	3		27.5212	27.7607
	F03	SYBR	mccr5	Unkn-14	3		27.9549	27.7607
	D04	SYBR	mccr5	Unkn-15	4		29.1906	28.854										10.49	-2.51001	5.69624	3 week-2
	E04	SYBR	mccr5	Unkn-15	4		28.642	28.854
	F04	SYBR	mccr5	Unkn-15	4		28.7294	28.854
	D05	SYBR	mccr5	Unkn-16	5		31.0972	30.6159	31.1159							30.1159		11.9636	-1.03641	2.05111	1 week L1
	E05	SYBR	mccr5	Unkn-16	5		30.2847	30.6159
	F05	SYBR	mccr5	Unkn-16	5		30.4657	30.6159
	D06	SYBR	mccr5	Unkn-17	6		31.1159	30.5565	31.0565									11.6208	-1.37916	2.60116	1 week R2
	E06	SYBR	mccr5	Unkn-17	6		30.3425	30.2768
	F06	SYBR	mccr5	Unkn-17	6		30.2111	30.5565
	D07	SYBR	mccr5	Unkn-18	7		33.6501	33.669										8.24303	-4.75697	27.0391	3 week 1
	E07	SYBR	mccr5	Unkn-18	7		33.6555	33.669
	F07	SYBR	mccr5	Unkn-18	7		33.7013	33.669
	D08	SYBR	mccr5	Unkn-19	8		29.7701	29.5944										11.6684	-1.3316	2.51682	1 week r1
	E08	SYBR	mccr5	Unkn-19	8		29.5409	29.5944
	F08	SYBR	mccr5	Unkn-19	8		29.4723	29.5944
	D09	SYBR	mccr5	Unkn-20	9		29.1918	29.1089										11.3663	-1.63375	3.10318	3 week-8
	E09	SYBR	mccr5	Unkn-20	9		29.1437	29.1089
	F09	SYBR	mccr5	Unkn-20	9		28.9913	29.1089
	E01	SYBR	GAPDH	Std-12	1		18.7085	18.7367
	F01	SYBR	GAPDH	Std-12	1		18.946	18.7367
	G01	SYBR	GAPDH	Std-12	1		18.5556	18.7367
	E10	SYBR	GAPDH	Std-21	10		18.3612	18.4167
	F10	SYBR	GAPDH	Std-21	10		18.4146	18.4167
	G10	SYBR	GAPDH	Std-21	10		18.4742	18.4167
	E11	SYBR	GAPDH	Std-22	11		18.7327	18.884
	F11	SYBR	GAPDH	Std-22	11		18.8162	18.884
	G11	SYBR	GAPDH	Std-22	11		19.103	18.884
	E02	SYBR	GAPDH	Std-13	2		17.5749	17.5956
	F02	SYBR	GAPDH	Std-13	2		17.7518	17.5956
	G02	SYBR	GAPDH	Std-13	2		17.4601	17.5956
	E03	SYBR	GAPDH	Std-14	3		17.1507	17.156
	F03	SYBR	GAPDH	Std-14	3		17.2209	17.156
	G03	SYBR	GAPDH	Std-14	3		17.0964	17.156
	E04	SYBR	GAPDH	Std-15	4		18.3418	18.364
	F04	SYBR	GAPDH	Std-15	4		18.4761	18.364
	G04	SYBR	GAPDH	Std-15	4		18.2742	18.364
	E05	SYBR	GAPDH	Std-16	5		18.6584	18.6523
	F05	SYBR	GAPDH	Std-16	5		18.7407	18.6523
	G05	SYBR	GAPDH	Std-16	5		18.5577	18.6523
	E06	SYBR	GAPDH	Std-17	6		18.9013	18.9356
	F06	SYBR	GAPDH	Std-17	6		19.0241	18.9356
	G06	SYBR	GAPDH	Std-17	6		18.8816	18.9356
	E07	SYBR	GAPDH	Std-18	7		25.4661	25.426
	F07	SYBR	GAPDH	Std-18	7		25.512	25.426
	G07	SYBR	GAPDH	Std-18	7		25.2998	25.426
	E08	SYBR	GAPDH	Std-19	8		17.8022	17.926
	F08	SYBR	GAPDH	Std-19	8		17.979	17.926
	G08	SYBR	GAPDH	Std-19	8		17.9969	17.926
	E09	SYBR	GAPDH	Std-20	9		17.7048	17.7427
	F09	SYBR	GAPDH	Std-20	9		17.7294	17.7427
	G09	SYBR	GAPDH	Std-20	9		17.7939	17.7427
	H03	SYBR	mCCR1	NTC				0
	H04	SYBR	mCCR1	NTC				0

## Sheet: qPCR ccr1,2,5 old vs young mice
	CCR1			CCR2			CCR5
	control	old mice		control	old mice		control	old mice
	0.034544	0.216031		0.0301651	0.216386		1.1745	2.76971
	0.124459	0.227205		0.285698	0.35641		1.76149	3.69092
	0.136018	0.492938		0.540886	0.976558		2.67204	3.99129			Legend
	0.125501	0.74174		1.00107	0.996248		2.96246	4.26138
	0.410924	0.824217		1.21571	1.4571		3.86292	4.52817
	0.557299	2.06093		0.0504066	1.56997		2.17853	4.61847
	0.191398	0.854504		0.24399	0.235044		3.50026	2.05384
	0.310507	0.45611		1.3153	0.451819		2.72037	3.71402
	0.831334			1.21703			4.98181
	0.453862
AVERAGE	0.317584	0.734209		0.614706	0.782441		2.86826	3.70347
STDV	0.24764	0.685268		0.531545	0.553568		1.14535	0.68348
SEM	0.0783107	0.279759		0.168089	0.225993		0.362191	0.27903
FOLD	2.31185			1.27287			1.29119
	young mice	old mice
CCR1	0.318949	0.734209
CCR2	0.614706	0.782441
CCR5	2.86826	3.70347
SEM	0.0779499	0.279759
	0.168089	0.225993
	0.362191	0.27903
						Cт	Cт Mean	(+) 0.5	(-) 0.5	ΔCт	ΔΔCT	2^(-ΔΔCT)
H05	SYBR	mCCR1	NTC-03				0							H07	SYBR	GAPDH	NTC-04				0
H06	SYBR	mCCR1	NTC-03			40.7486	40.7486							H08	SYBR	GAPDH	NTC-04				0
A07	SYBR	mCCR1	Unkn-13	4		37.2774	37.0529			15.2107	2.21069	0.216031		D07	SYBR	GAPDH	Unkn-14	4		21.7617	21.8423
B07	SYBR	mCCR1	Unkn-13	4		36.8285								E07	SYBR	GAPDH	Unkn-14	4		21.6867	21.8423
C07	SYBR	mCCR1	Unkn-13	4		36.1537								F07	SYBR	GAPDH	Unkn-14	4		22.0783	21.8423
A08	SYBR	mCCR1	Unkn-15	5		35.9234	35.2838			14.0205	1.02052	0.492938		D08	SYBR	GAPDH	Unkn-16	5		21.3064	21.2633
B08	SYBR	mCCR1	Unkn-15	5		34.6443	35.8753							E08	SYBR	GAPDH	Unkn-16	5		21.1124	21.2633
C08	SYBR	mCCR1	Unkn-15	5		37.0583	35.8753							F08	SYBR	GAPDH	Unkn-16	5		21.3712	21.2633
A09	SYBR	mCCR1	Unkn-17	6		35.9884	36.4296			15.1379	2.13793	0.227205		D09	SYBR	GAPDH	Unkn-18	6		21.4218	21.2917
B09	SYBR	mCCR1	Unkn-17	6		35.0435								E09	SYBR	GAPDH	Unkn-18	6		21.264	21.2917
C09	SYBR	mCCR1	Unkn-17	6		36.8708								F09	SYBR	GAPDH	Unkn-18	6		21.1894	21.2917
														H07	SYBR	GAPDH	NTC				0
A09	SYBR	mCCR1	Unkn-09	9		31.0531	31.2448	31.7448	30.7448	11.9567	-1.04329	2.06093		H08	SYBR	GAPDH	NTC			37.9164	37.9164
B09	SYBR	mCCR1	Unkn-09	9		31.2486	31.2448							D10	SYBR	GAPDH	Std-19	10		19.3331	19.2769	19.7769	18.7769
C09	SYBR	mCCR1	Unkn-09	9		31.4328	31.2448							E10	SYBR	GAPDH	Std-19	10		19.1782	19.2769
A10	SYBR	mCCR1	Unkn-10	10		33.0578	32.7079	33.2079	32.2079	13.431	0.431014	0.74174		F10	SYBR	GAPDH	Std-19	10		19.3195	19.2769
B10	SYBR	mCCR1	Unkn-10	10		32.7201	32.7079							D11	SYBR	GAPDH	Std-20	11		19.1413	19.1687	19.6687	18.6687
C10	SYBR	mCCR1	Unkn-10	10		32.3459	32.7079							E11	SYBR	GAPDH	Std-20	11		18.9688	19.1687
A11	SYBR	mCCR1	Unkn-11	11		32.6458	32.4476	32.9476	31.9476	13.2789	0.278904	0.824217		F11	SYBR	GAPDH	Std-20	11		19.3961	19.1687
B11	SYBR	mCCR1	Unkn-11	11		32.2495	32.4476							D09	SYBR	GAPDH	Std-18	9		19.3461	19.2881	19.7881	18.7881
C11	SYBR	mCCR1	Unkn-11	11			0							E09	SYBR	GAPDH	Std-18	9		19.1608	19.2881
														F09	SYBR	GAPDH	Std-18	9		19.3575	19.2881
G07	SYBR	mCCR1	NTC				0
G08	SYBR	mCCR1	NTC				0							H09	SYBR	mGAPDH	NTC				0
A01	SYBR	mCCR1	old mice-1	1		34.4157	33.4292			13.2268	0.226841	0.854504		H10	SYBR	mGAPDH	NTC				0
B01	SYBR	mCCR1		1		33.5475	33.758							D07	SYBR	mGAPDH	old mice-1	1		20.2804	20.2024
C01	SYBR	mCCR1		1		33.3109	33.758							E07	SYBR	mGAPDH		1		20.0942	20.2024
A02	SYBR	mCCR1	old mice 3	2		37.0646	36.2118			14.1325	1.13255	0.45611		F07	SYBR	mGAPDH		1		20.2325	20.2024
B02	SYBR	mCCR1		2		36.2482	36.2118							D08	SYBR	mGAPDH	old mice 3	2		22.1667	22.0793
C02	SYBR	mCCR1		2		35.3228	36.2118							E08	SYBR	mGAPDH		2		21.9599	22.0793
		mCCR1												F08	SYBR	mGAPDH		2		22.1113	22.0793
SYBR	ccr2	NTC				40.2864	40.2864
SYBR	ccr2	NTC					0
SYBR	ccr2	old mice-1	1			34.6566	35.2914			15.089	2.089	0.235044
SYBR	ccr2		1			33.0539	34.5455
SYBR	ccr2		1			35.9261	34.5455
SYBR	ccr2	old mice 3	2			38.3459	36.2255			14.1462	1.14618	0.451819
SYBR	ccr2		2			36.4096	36.9323
SYBR	ccr2		2			36.0414	36.9323
H01	SYBR	mccr2	NTC-01				0
H02	SYBR	mccr2	NTC-01				0
A01	SYBR	mccr2	Unkn-01	1		31.9011	31.7456			12.4569	-0.543096	1.4571		D07	SYBR	GAPDH	Unkn-11	9		19.3529	19.2887
B01	SYBR	mccr2	Unkn-01	1		31.7283	31.7456							E07	SYBR	GAPDH	Unkn-11	9		19.219	19.2887
C01	SYBR	mccr2	Unkn-01	1		31.6073	31.7456							F07	SYBR	GAPDH	Unkn-11	9		19.2942	19.2887
A02	SYBR	mccr2	Unkn-03	2		33.266	32.4534			13.0054	0.00542327	0.996248		D08	SYBR	GAPDH	Unkn-12	10		19.5595	19.448
B02	SYBR	mccr2	Unkn-03	2		32.5361	32.7243							E08	SYBR	GAPDH	Unkn-12	10		19.3611	19.448
C02	SYBR	mccr2	Unkn-03	2		32.3707	32.7243							F08	SYBR	GAPDH	Unkn-12	10		19.4235	19.448
A03	SYBR	mccr2	Unkn-05	3		35.4034	31.4797			12.3493	-0.650735	1.56997		D09	SYBR	GAPDH	Unkn-13	11		19.226	19.1304
B03	SYBR	mccr2	Unkn-05	3		31.8176	32.7876							E09	SYBR	GAPDH	Unkn-13	11		19.0744	19.1304
C03	SYBR	mccr2	Unkn-05	3		31.1418	32.7876							F09	SYBR	GAPDH	Unkn-13	11		19.0909	19.1304
A04	SYBR	mccr2	Unkn-07	4			36.3306			14.4884	1.48839	0.35641
B04	SYBR	mccr2	Unkn-07	4		36.3306
C04	SYBR	mccr2	Unkn-07	4			0
A05	SYBR	mccr2	Unkn-09	5		35.5635	34.2975			13.0342	0.0342222	0.976558
B05	SYBR	mccr2	Unkn-09	5		34.0491	34.7195
C05	SYBR	mccr2	Unkn-09	5		34.5459	34.7195
A06	SYBR	mccr2	Unkn-11	6		37.0589	36.5			15.2083	2.20832	0.216386
B06	SYBR	mccr2	Unkn-11	6		36.6527	36.6863
C06	SYBR	mccr2	Unkn-11	6		36.3474	36.6863
H03	SYBR	mccr5	NTC-02				0
H04	SYBR	mccr5	NTC-02				0
D01	SYBR	mccr5	Unkn-02	1		30.3279	30.356			11.0031	-1.99685	3.99129
E01	SYBR	mccr5	Unkn-02	1		30.299	30.356
F01	SYBR	mccr5	Unkn-02	1		30.4412	30.356
D02	SYBR	mccr5	Unkn-04	2		30.4747	30.3806			10.8211	-2.17893	4.52817
E02	SYBR	mccr5	Unkn-04	2		30.2326	30.3806
F02	SYBR	mccr5	Unkn-04	2		30.4344	30.3806
D03	SYBR	mccr5	Unkn-06	3		33.2561	30.7563			11.5303	-1.46974	2.76971
E03	SYBR	mccr5	Unkn-06	3		30.409	31.5896
F03	SYBR	mccr5	Unkn-06	3		31.1036	31.5896
D04	SYBR	mccr5	Unkn-08	4		33.1706	32.9583			11.116	-1.88398	3.69092
E04	SYBR	mccr5	Unkn-08	4		32.3476	32.7547
F04	SYBR	mccr5	Unkn-08	4		32.746	32.7547
D05	SYBR	mccr5	Unkn-10	5		32.2777	32.172			10.9087	-2.09132	4.26138
E05	SYBR	mccr5	Unkn-10	5		32.2796	32.172
F05	SYBR	mccr5	Unkn-10	5		31.9587	32.172
D06	SYBR	mccr5	Unkn-12	6		32.3891	32.0843			10.7926	-2.20741	4.61847
E06	SYBR	mccr5	Unkn-12	6		31.7106	32.0843
F06	SYBR	mccr5	Unkn-12	6		32.1532	32.0843
G09	SYBR	ccr5	NTC				0
G10	SYBR	ccr5	NTC			37.3828	37.3828
D01	SYBR	ccr5	old mice-1	1		32.2098	32.164			11.9617	-1.03832	2.05384
E01	SYBR	ccr5		1		32.1183	32.6242
F01	SYBR	ccr5		1		33.5446	32.6242
D02	SYBR	ccr5	old mice- 3	2		34.368	33.1863			11.107	-1.89298	3.71402
E02	SYBR	ccr5		2		33.0665	33.5802
F02	SYBR	ccr5		2		33.3061	33.5802
control mice						Cт	Cт Mean	(+) 0.5	(-) 0.5	ΔCт	ΔΔCT	2^(-ΔΔCT)
A01	SYBR	ccr1	Unkn-01	1		36.1751	36.1751			15.3854	2.38535	0.191398		D07	SYBR	gapdh	Unkn-14	1		20.9295	20.7898
B01	SYBR	ccr1	Unkn-01	1			0							E07	SYBR	gapdh	Unkn-14	1		20.6137	20.7898
C01	SYBR	ccr1	Unkn-01	1			0							F07	SYBR	gapdh	Unkn-14	1		20.8261	20.7898
A02	SYBR	ccr1	Unkn-03	2			0			14.6873	1.6873	0.310507		D08	SYBR	gapdh	Unkn-16	2		21.3085	21.2571
B02	SYBR	ccr1	Unkn-03	2		36.0736	35.9444							E08	SYBR	gapdh	Unkn-16	2		21.1363	21.2571
C02	SYBR	ccr1	Unkn-03	2		35.8152	35.9444							F08	SYBR	gapdh	Unkn-16	2		21.3265	21.2571
A03	SYBR	ccr1	Unkn-05	3			0							D09	SYBR	gapdh	Unkn-18	3		26.1235	26.0834
B03	SYBR	ccr1	Unkn-05	3			0							E09	SYBR	gapdh	Unkn-18	3		26.0021	26.0834
C03	SYBR	ccr1	Unkn-05	3			0							F09	SYBR	gapdh	Unkn-18	3		26.1245	26.0834
A04	SYBR	ccr1	Unkn-07	4			0							D10	SYBR	gapdh	Unkn-20	4		23.3135	23.136
B04	SYBR	ccr1	Unkn-07	4			0							E10	SYBR	gapdh	Unkn-20	4		23.0269	23.136
C04	SYBR	ccr1	Unkn-07	4			0							F10	SYBR	gapdh	Unkn-20	4		23.0675	23.136
A05	SYBR	ccr1	Unkn-09	5		33.1739	33.9338			13.2665	0.266499	0.831334		D11	SYBR	gapdh	Unkn-22	5		20.7495	20.6673
B05	SYBR	ccr1	Unkn-09	5		33.7293	33.6805							E11	SYBR	gapdh	Unkn-22	5		20.4522	20.6673
C05	SYBR	ccr1	Unkn-09	5		34.1383	33.6805							F11	SYBR	gapdh	Unkn-22	5		20.8002	20.6673
A06	SYBR	ccr1	Unkn-11	6		36.9793	36.8866			14.1397	1.13967	0.453862		D12	SYBR	gapdh	Unkn-24	6		23.8033	22.7469
B06	SYBR	ccr1	Unkn-11	6			0							E12	SYBR	gapdh	Unkn-24	6		22.6265	23.099
C06	SYBR	ccr1	Unkn-11	6		36.7938	36.8866							F12	SYBR	gapdh	Unkn-24	6		22.8672	23.099
H03	SYBR	ccr1	NTC-01				0							H09	SYBR	gapdh	NTC-04				0
H04	SYBR	ccr1	NTC-01				0							H10	SYBR	gapdh	NTC-04				0
														A1	1	M GAPDH	control 1	16.7419	16.6917	17.1917	16.1917
A7	1	M CCR1	31.0489				30.9747	31.4747	30.4747	14.2831	1.28306	0.410924		B1	1	M GAPDH	control 1	16.6704
B7	1	M CCR1	31.0639											C1	1	M GAPDH	control 1	16.6627
C7	1	M CCR1	30.8114											A2	2	M GAPDH	control 2	17.9333	17.8205	18.3205	17.3205
A8	2	M CCR1	32.5521				31.664	32.164	31.164	13.8435	0.843477	0.557299		B2	2	M GAPDH	control 2	17.767
B8	2	M CCR1	31.0491											C2	2	M GAPDH	control 2	17.7612
C8	2	M CCR1	31.3908
														D1	Sample 1	mgapdh	17.946	17.9641	18.4641	17.4641
														E1	Sample 1	mgapdh	18.013
														F1	Sample 1	mgapdh	17.9334
														D2	Sample 2	mgapdh	18.0524	18.0921	18.5921	17.5921
A1	Sample 1	mccr1	33.8095				33.9584	34.4584	33.4584	15.9942	2.99423	0.125501		E2	Sample 2	mgapdh	18.1205
B1	Sample 1	mccr1	34.8827											F2	Sample 2	mgapdh	18.1033
C1	Sample 1	mccr1	34.1073											D3	Sample 3	mgapdh	17.8953	17.9304	18.4304	17.4304
A2	Sample 2	mccr1	33.8666				33.9702	34.4702	33.4702	15.8781	2.87814	0.136018		E3	Sample 3	mgapdh	17.9715
B2	Sample 2	mccr1	34.0738											F3	Sample 3	mgapdh	17.9245
C2	Sample 2	mccr1	33.0628											D4	Sample 4	mgapdh	16.6144	16.6226	17.1226	16.1226
A3	Sample 3	mccr1	34.8975				33.9367	34.4367	33.4367	16.0063	3.00626	0.124459		E4	Sample 4	mgapdh	16.6252
B3	Sample 3	mccr1	33.6959											F4	Sample 4	mgapdh	16.6282
C3	Sample 3	mccr1	34.1775
A4	Sample 4	mccr1	34.4556				34.478	34.978	33.978	17.8554	4.85542	0.034544
B4	Sample 4	mccr1	34.5004
C4	Sample 4	mccr1	35.8083
						Cт	Cт Mean	(+) 0.5	(-) 0.5	ΔCт	ΔΔCT	2^(-ΔΔCT)
A02	SYBR	mccr2	Unkn-01	2		32.4017	32.3929			12.9985	-0.00154743	1.00107		A08	SYBR	GAPDH	Unkn-14	2		19.4474	19.3944
B02	SYBR	mccr2	Unkn-01	2		33.2349	32.6736							B08	SYBR	GAPDH	Unkn-14	2		19.4643	19.3944
C02	SYBR	mccr2	Unkn-01	2		32.3841	32.6736							C08	SYBR	GAPDH	Unkn-14	2		19.2716	19.3944
A03	SYBR	mccr2	Unkn-02	3		32.214	32.0347			12.7182	-0.281796	1.21571		A09	SYBR	GAPDH	Unkn-15	3		19.419	19.3165
B03	SYBR	mccr2	Unkn-02	3		32.0875	32.0347							B09	SYBR	GAPDH	Unkn-15	3		19.2539	19.3165
C03	SYBR	mccr2	Unkn-02	3		31.8027	32.0347							C09	SYBR	GAPDH	Unkn-15	3		19.2767	19.3165
A04	SYBR	mccr2	Unkn-03	4		33.9768	36.3248			18.051	5.05097	0.0301651		A10	SYBR	GAPDH	Unkn-16	4		18.319	18.2738
B04	SYBR	mccr2	Unkn-03	4		39.7057	36.3248							B10	SYBR	GAPDH	Unkn-16	4		18.2956	18.2738
C04	SYBR	mccr2	Unkn-03	4		35.2919	36.3248							C10	SYBR	GAPDH	Unkn-16	4		18.2068	18.2738
A05	SYBR	mccr2	Unkn-04	5		32.2975	32.4893			14.8074	1.80744	0.285698		A11	SYBR	GAPDH	Unkn-17	5		17.8494	17.6818
B05	SYBR	mccr2	Unkn-04	5		32.5557	32.4893							B11	SYBR	GAPDH	Unkn-17	5		17.6165	17.6818
C05	SYBR	mccr2	Unkn-04	5		32.6147	32.4893							C11	SYBR	GAPDH	Unkn-17	5		17.5796	17.6818
A06	SYBR	mccr2	Unkn-05	6		32.4385	32.2602			13.8866	0.886605	0.540886		A12	SYBR	GAPDH	Unkn-18	6		18.3733	18.3736
B06	SYBR	mccr2	Unkn-05	6		33.2465	32.589							B12	SYBR	GAPDH	Unkn-18	6		18.3531	18.3736
C06	SYBR	mccr2	Unkn-05	6		32.0819	32.589							C12	SYBR	GAPDH	Unkn-18	6		18.3944	18.3736
H01	SYBR	mccr2	NTC-14				0							D07	SYBR	GAPDH	Unkn-11	7		19.3529	19.2887
H02	SYBR	mccr2	NTC-14			39.5125	39.5125							E07	SYBR	GAPDH	Unkn-11	7		19.219	19.2887
														F07	SYBR	GAPDH	Unkn-11	7		19.2942	19.2887
A07	SYBR	ccr2	Unkn-13	1			38.1			17.3102	4.31024	0.0504066		D08	SYBR	GAPDH	Unkn-12	8		19.5595	19.448
B07	SYBR	ccr2	Unkn-13	1		36.3628	38.1026							E08	SYBR	GAPDH	Unkn-12	8		19.3611	19.448
C07	SYBR	ccr2	Unkn-13	1		39.8424	38.1026							F08	SYBR	GAPDH	Unkn-12	8		19.4235	19.448
A08	SYBR	ccr2	Unkn-15	2		36.3684	36.2922			15.0351	2.03511	0.24399		D09	SYBR	GAPDH	Unkn-13	9		19.226	19.1304
B08	SYBR	ccr2	Unkn-15	2		34.9488	35.8444							E09	SYBR	GAPDH	Unkn-13	9		19.0744	19.1304
C08	SYBR	ccr2	Unkn-15	2		36.2161	35.8444							F09	SYBR	GAPDH	Unkn-13	9		19.0909	19.1304
A09	SYBR	ccr2	Unkn-17	3			0							A07	SYBR	GAPDH	NTC-17				0
B09	SYBR	ccr2	Unkn-17	3			0							B07	SYBR	GAPDH	NTC-17				0
C09	SYBR	ccr2	Unkn-17	3		34.4718	34.4718
A10	SYBR	ccr2	Unkn-19	4			0
B10	SYBR	ccr2	Unkn-19	4			0
C10	SYBR	ccr2	Unkn-19	4			0
A11	SYBR	ccr2	Unkn-21	5		33.1347	33.2719			12.6046	-0.395396	1.3153
B11	SYBR	ccr2	Unkn-21	5		33.0883	33.2719
C11	SYBR	ccr2	Unkn-21	5		33.5928	33.2719
A12	SYBR	ccr2	Unkn-23	6		36.5275	35.4635			12.7166	-0.283364	1.21703
B12	SYBR	ccr2	Unkn-23	6			0
C12	SYBR	ccr2	Unkn-23	6		34.3995	35.4635
H05	SYBR	ccr2	NTC-02			40.6848	40.6848
H06	SYBR	ccr2	NTC-02				0
						Cт	Cт Mean	(+) 0.5	(-) 0.5	ΔCт	ΔΔCT	2^(-ΔΔCT)
D01	SYBR	ccr5	Unkn-02	1		32.8671	32.6664			11.8766	-1.12335	2.17853
E01	SYBR	ccr5	Unkn-02	1		32.5484	32.6664
F01	SYBR	ccr5	Unkn-02	1		32.5838	32.6664
D02	SYBR	ccr5	Unkn-04	2		32.5	32.4496			11.1925	-1.80746	3.50026
E02	SYBR	ccr5	Unkn-04	2		32.3993	32.7241
F02	SYBR	ccr5	Unkn-04	2		33.2729	32.7241
D03	SYBR	ccr5	Unkn-06	3		36.0176	35.9972
E03	SYBR	ccr5	Unkn-06	3		36.0078	35.9972
F03	SYBR	ccr5	Unkn-06	3		35.9662	35.9972
D04	SYBR	ccr5	Unkn-08	4		34.2404	34.2248			11.0888	-1.91118	3.76117
E04	SYBR	ccr5	Unkn-08	4		34.0712	34.2248
F04	SYBR	ccr5	Unkn-08	4		34.3627	34.2248
D05	SYBR	ccr5	Unkn-10	5		32.3612	32.2235			11.5562	-1.4438	2.72037
E05	SYBR	ccr5	Unkn-10	5		31.9994	32.2235
F05	SYBR	ccr5	Unkn-10	5		32.31	32.2235
D06	SYBR	ccr5	Unkn-12	6		33.8528	33.4302			10.6833	-2.31667	4.98181
E06	SYBR	ccr5	Unkn-12	6		33.2017	33.4302
F06	SYBR	ccr5	Unkn-12	6		33.2361	33.4302
D02	SYBR	mccr5	Unkn-06	3		30.9697	30.7497			11.4332	-1.5668	2.96246
E02	SYBR	mccr5	Unkn-06	3		30.5869	30.7497
F02	SYBR	mccr5	Unkn-06	3		30.6927	30.7497
D03	SYBR	mccr5	Unkn-07	2		30.5339	30.4448			11.0503	-1.94969	3.86292
E03	SYBR	mccr5	Unkn-07	2		30.3413	30.4448
F03	SYBR	mccr5	Unkn-07	2		30.4591	30.4448
D04	SYBR	mccr5	Unkn-08	4		30.6196	30.457			12.1832	-0.816794	1.76149
E04	SYBR	mccr5	Unkn-08	4		29.8358	30.25
F04	SYBR	mccr5	Unkn-08	4		30.2945	30.25
D05	SYBR	mccr5	Unkn-09	5		30.5372	30.4498			12.7679	-0.23205	1.1745
E05	SYBR	mccr5	Unkn-09	5		30.2614	30.4498
F05	SYBR	mccr5	Unkn-09	5		30.5507	30.4498
D06	SYBR	mccr5	Unkn-10	6		30.0793	29.9556			11.5821	-1.41794	2.67204
E06	SYBR	mccr5	Unkn-10	6		29.7558	29.9556
F06	SYBR	mccr5	Unkn-10	6		30.0318	29.9556
H03	SYBR	mccr5	NTC-15				0
H04	SYBR	mccr5	NTC-15				0
