# Supplementary material for: CCR1 mediates Müller cell activation and photoreceptor cell death in macular and retinal degeneration
Source: eLife. 2023 Oct 30;12:e81208. doi: 10.7554/eLife.81208 (PMC10615370; doi:10.7554/eLife.81208)
Supplement: Figure 6—source data 1. — Real-time quantitative PCR (qPCR) analysis of retinal F4/80, Ccr1, Ccl2, Cxcl1, and Cxcl10 mRNA in control mice, vehicle-treated photic-injured mice, and BX471-treated photic-injured mice. [file elife-81208-fig6-data1.xlsx]

## Sheet: erg 
																					Legend
bx-471	0.0006	0.0025	0.01	0.04	0.16	0.63	2.5	10			vehicle	0.0006	0.0025	0.01	0.04	0.16	0.63	2.5	10
1	180	205	194	236	279	323	301	214			1	129	122	151	155	171	144	110	102
2	109	164	86	143	160	263	206	149			2	81	63	109	86	113	80	76	71
3	67	96	123	85	92	70	81	78			3	94	120	116	93	101	137	109	67
4	113	149	170	174	166	144	146	119			4	89	106	111	59	92	110	119	71
5	159	197	182	177	235	217	204	161			5	130	182	162	154	195	200	175	153
6	211	269	242	266	306	308	273	226			6	194	241	232	248	305	309	260	226
7	98	144	118	98	103	65	66	67			7		79	83	85	97	97	68	47
8	88	142	126	104	107	73	79	62			8		64	66	53	111	94	97	48
9	280	288	295	339	385	396	396	303			9	62	146	125	131	143	177	165	141
10	264	272	278	309	355	381	380	317			10	131	244	214	220	277	322	317	271
11	160	252	237	234	334	330	294	265			11	105	96	74	125	160	128	167	142
12	130	185	188	180	257	290	233	233			12	174	209	192	212	278	240	272	238
error +	291.492	320.133	319.537	361.064	439.311	482.527	447.541	362.982
error -	18.3418	73.7008	53.6296	29.7698	23.8554	-5.86083	-4.37476	2.68424
average	154.917	196.917	186.583	195.417	231.583	238.333	221.583	182.833				113.75	136.7	136.9	128.4	160.5	167	149.6	119.7
stdv	68.2874	61.6079	66.4769	82.8234	103.864	122.097	112.979	90.0745				41.3824	66.6784	53.5173	66.249	76.7612	86.8293	81.7098	77.4698
sem	19.7129	17.7847	19.1902	23.9091	29.9829	35.2464	32.6142	26.0023				11.9461	19.2484	15.4491	19.1244	22.159	25.0655	23.5876	22.3636
	0.0006	0.0025	0.01	0.04	0.16	0.63	2.5	10
CCR1 inhibitor	154.917	196.917	186.583	195.417	231.583	238.333	221.583	182.833
vehicle	118.9	139.333	136.25	135.083	170.25	169.833	161.25	131.417
ratio	1.30292	1.41328	1.36942	1.44664	1.36025	1.40334	1.37416	1.39125

## Sheet: ONL thickness
																			Legend
							1200	900	600	300	50	0	50	300	600	900	1200
					1		8.5	7	6	9	5	0	6	6.5	8.5	7	5.5
					2		7	7.5	6	6	6	0	5	5	7	6	6
					3		9	7.5	9	6	4	0	3	10	9	6	8
					4		5	10	5	7	3	0	4	6	6	6	7
					5		9	6	5	6	5	0	4	4.5	7	6	6
					6		8	6	6	5.5	3	0	3	5.5	5.5	5	6
					7		6	6	7	6	3.5	0	4	4	3.5	4	4
					8		6	7	7	5.5	4	0	5	4	3.5	5	5
					9		7	7	7	7	5	0	5	4	5	5.5	5.5
					10		7	5	7	4		0	5	5	3	4	5.5
					11					6.5	6.5	0	5	5.5	6	6	8
					12		8	7	7	9	5	0	4	5	9	8	8
					13		7	6	4.5	6.5	4	0	6	5.5	5	4	3.5
					14		5	5.5	6	6	3	0	4	4.5	5.5	5	5
					AVERAGE		7.11538	6.73077	6.34615	6.42857	4.38462	0	4.5	5.35714	5.96429	5.53571	5.92857
					STDV		1.35637	1.25192	1.17942	1.3135	1.13933	0	0.94054	1.53709	1.96571	1.15133	1.41227
					SEM		0.362506	0.33459	0.315213	0.351047	0.304499	0	0.25137	0.410804	0.525358	0.307705	0.377445
					error		9.82813	9.23461	8.70499	9.05557	6.66328	0	6.38108	8.43132	9.8957	7.83836	8.75311
					1		8	10	8	11	4	0	5.5	6	4	6	14
					2		13		6	9				8.5	7	8	7
					3		11	8.5	7	6.5	4	0	4	4.5	4.5	8	6
					4		7	9	11	7.5	3.5	0	5	6	9	8	12
					5		10	7	8	6	4	0	3.5	5	4	4.5	7
					6		10	6	9	8				6	7	7	6
					7		6	10	13	8				5.5	7	5	6
					8		6	9	12	5.5	3	0	3	6.5	7	7.5	7
					9		8	7.5	6	8	9	0	8	3	7	8.5	10
					10		13	9	6	9	7	0	8	6	6	8.5	9
					11		7	7	8	7	5	0	5	6	6	6.5	8
					12		9.5	8	7	7	6	0	3	4	7	7	7
					13		7	5	4.5	6	5	0	5	3	4	3.5	5
					14		7	6	9	10	6	0	6	7	7	7	8
					AVERAGE		8.75	7.84615	8.17857	7.75	5.13636	0	5.09091	5.5	6.17857	6.78571	8
					SDTV		2.37576	1.5862	2.4464	1.59023	1.76197	0	1.74382	1.5064	1.51413	1.54066	2.51151
					ERROR+		13.5015	11.0186	13.0714	10.9305	8.66031	0	8.57855	8.51279	9.20683	9.86703	13.023
					RATIO		1.22973	1.16571	1.28874	1.20556	1.17145		1.13131	1.02667	1.03593	1.22581	1.3494
					SEM		0.634948	0.423929	0.653829	0.425008	0.470907	0	0.466056	0.402601	0.404668	0.411758	0.67123
					fold change		1.24981	1.16571	1.28874	1.20556	1.17145		1.13131	1.02667	1.03593	1.22581	1.3494
							1200	900	600	300	50	0	50	300	600	900	1200
					CCR1 inhibitor		8.89286	7.84615	8.17857	7.75	5.13636	0	5.09091	5.5	6.17857	6.78571	8
					Vehicle		7.11538	6.73077	6.34615	6.42857	4.38462	0	4.5	5.35714	5.96429	5.53571	5.92857

## Sheet: qPCR f480 
	Well	Fluor	Target	Content	Sample	Biological Set Name
								Cт mean	(+0.5)	(-0.5)	ΔCт	ΔΔCT	2^(-ΔΔCT)			VEHICLE	BX471	CONTROL
	H04	SYBR	F4/80	NTC			37.3121	37.3121								2.93286	1.64041	0.124939		Legend
	H05	SYBR	F4/80	NTC			37.8631	37.8631								4.17467	1.04194	0.347111
	D01	SYBR	F4/80	Unkn-12	1		31.2141	31.1075	31.6075	30.6075	13.3707	3.0007	0.124939			2.74287	1.0494	0.463877
	E01	SYBR	F4/80	Unkn-12	1		30.7417	31.1075								1.89614	1.02005	0.546949
	F01	SYBR	F4/80	Unkn-12	1		31.3667	31.1075								0.997567	0.25385	0.361834
	D02	SYBR	F4/80	Unkn-13	2		30.1491	30.1745	30.6745	29.6745	11.8965	1.52653	0.347111			1.94077	1.08377	0.180557
	E02	SYBR	F4/80	Unkn-13	2		30.1666	30.1745								VEHICLE	BX471	CONTROL
	F02	SYBR	F4/80	Unkn-13	2		30.2078	30.1745							AVERAGE	2.44748	1.0149	0.337545
	D03	SYBR	F4/80	Unkn-14	3		30.8213	30.9832	31.4832	30.4832	11.4782	1.10818	0.463877		STDV	1.09261	0.442074	0.161454
	E03	SYBR	F4/80	Unkn-14	3		30.8573	30.9832							SEM	0.446057	0.180476	0.0659135
	F03	SYBR	F4/80	Unkn-14	3		31.2711	30.9832								0.0138742	0.00548859	0.000868332
	D04	SYBR	F4/80	Unkn-15	4		30.1864	30.2265	30.7265	29.7265	11.2405	0.870522	0.546949
	E04	SYBR	F4/80	Unkn-15	4		30.0744	30.2265
	F04	SYBR	F4/80	Unkn-15	4		30.4187	30.2265
	D05	SYBR	F4/80	Unkn-16	5		31.3519	31.2224	31.7224	30.7224	11.8366	1.4666	0.361834
	E05	SYBR	F4/80	Unkn-16	5		31.0798	31.2224
	F05	SYBR	F4/80	Unkn-16	5		31.2354	31.2224
	D06	SYBR	F4/80	Unkn-17	6		31.0132	31.045	31.545	30.545	12.8395	2.46948	0.180557
	E06	SYBR	F4/80	Unkn-17	6		31.0194	31.045
	F06	SYBR	F4/80	Unkn-17	6		31.1024	31.045
			MOUSE NOT EXPOSED TO LIGHT
			GAPDH	Unkn-09	5		17.7827	17.7368
			GAPDH	Unkn-09	5		17.616	17.7368
			GAPDH	Unkn-09	5		17.8117	17.7368
			GAPDH	Unkn-10	6		18.334	18.278
			GAPDH	Unkn-10	6		18.2144	18.278
			GAPDH	Unkn-10	6		18.2855	18.278
			GAPDH	Unkn-11	7		19.7106	19.5051
			GAPDH	Unkn-11	7		19.335	19.5051
			GAPDH	Unkn-11	7		19.4695	19.5051
			GAPDH	Unkn-12	8		19.1185	18.986
			GAPDH	Unkn-12	8		18.8645	18.986
			GAPDH	Unkn-12	8		18.9748	18.986
			GAPDH	Unkn-13	9		19.5683	19.3858
			GAPDH	Unkn-13	9		19.297	19.3858
			GAPDH	Unkn-13	9		19.292	19.3858
			GAPDH	Unkn-14	10		18.4583	18.2055
			GAPDH	Unkn-14	10		18.0586	18.2055
			GAPDH	Unkn-14	10		18.0997	18.2055
	H01	SYBR	f4/80	NTC			39.1451	39.1451
	H02	SYBR	f4/80	NTC			39.0662	39.0662
	A01	SYBR	f4/80	Unkn-01	1		31.3764	31.543	9.65595	-0.714053	1.64041
	B01	SYBR	f4/80	Unkn-01	1		31.5237	31.543
	C01	SYBR	f4/80	Unkn-01	1		31.729	31.543
	A02	SYBR	f4/80	Unkn-02	2		32.4953	32.4272	10.3107	-0.0592709	1.04194
	B02	SYBR	f4/80	Unkn-02	2		32.3644	32.4272
	C02	SYBR	f4/80	Unkn-02	2		32.4219	32.4272
	A03	SYBR	f4/80	Unkn-03	3		32.2862	32.1864	10.3004	-0.0695676	1.0494
	B03	SYBR	f4/80	Unkn-03	3		32.3767	32.1864
	C03	SYBR	f4/80	Unkn-03	3		31.8962	32.1864
	A04	SYBR	f4/80	Unkn-04	4		30.7205	30.5213	10.3414	-0.0286446	1.02005
	B04	SYBR	f4/80	Unkn-04	4		30.5483	30.5213
	C04	SYBR	f4/80	Unkn-04	4		30.295	30.5213
	A05	SYBR	f4/80	Unkn-05	5		29.925	30.0815	8.81769	-1.55231	2.93286
	B05	SYBR	f4/80	Unkn-05	5		30.3504	30.0815
	C05	SYBR	f4/80	Unkn-05	5		29.9691	30.0815
	A06	SYBR	f4/80	Unkn-06	6		31.0488	31.189	8.30834	-2.06166	4.17467
	B06	SYBR	f4/80	Unkn-06	6		31.3326	31.189
	C06	SYBR	f4/80	Unkn-06	6		31.1857	31.189
	A07	SYBR	f4/80	Unkn-07	7		33.55	33.3166	8.91432	-1.45568	2.74287
	B07	SYBR	f4/80	Unkn-07	7		33.0832	33.9024
	C07	SYBR	f4/80	Unkn-07	7		35.0739	33.9024
	A08	SYBR	f4/80	Unkn-08	8		29.6352	29.7386	9.44693	-0.923069	1.89614
	B08	SYBR	f4/80	Unkn-08	8		29.6462	29.7386
	C08	SYBR	f4/80	Unkn-08	8		29.9345	29.7386
			GAPDH	Std-09	1		21.9336	21.8871
			GAPDH	Std-09	1		21.7573	21.8871
			GAPDH	Std-09	1		21.9704	21.8871
			GAPDH	Std-10	2		22.1777	22.1164
			GAPDH	Std-10	2		22.0446	22.1164
			GAPDH	Std-10	2		22.1271	22.1164
			GAPDH	Std-11	3		22.077	21.886
			GAPDH	Std-11	3		21.7357	21.886
			GAPDH	Std-11	3		21.8451	21.886
			GAPDH	Std-12	4		20.2478	20.1799
			GAPDH	Std-12	4		20.0697	20.1799
			GAPDH	Std-12	4		20.2221	20.1799
			GAPDH	Std-13	5		21.362	21.2638
			GAPDH	Std-13	5		21.2474	21.2638
			GAPDH	Std-13	5		21.1821	21.2638
			GAPDH	Std-14	6		23.0028	22.8807
			GAPDH	Std-14	6		22.7549	22.8807
			GAPDH	Std-14	6		22.8843	22.8807
			GAPDH	Std-15	7		24.5181	24.4023
			GAPDH	Std-15	7		24.287	24.4023
			GAPDH	Std-15	7		24.4018	24.4023
			GAPDH	Std-16	8		20.3225	20.2917
			GAPDH	Std-16	8		20.2087	20.2917
			GAPDH	Std-16	8		20.3439	20.2917
						Cт mean	(+0.5)	(-0.5)	ΔCт	ΔΔCT	2^(-ΔΔCT)
	A01	f4/80	Unkn-01	1	30.7213	31.2251	31.7251	30.7251	10.3735	0.00351397	0.997567
	B01	f4/80	Unkn-01	1	31.4361	31.2251
	C01	f4/80	Unkn-01	1	31.5179	31.2251
	A02	f4/80	Unkn-02	2	32.2736	32.0429	32.5429	31.5429	10.2539	-0.116058	1.08377
	B02	f4/80	Unkn-02	2	31.8849	31.9276
	C02	f4/80	Unkn-02	2	31.9703	32.0429
	A03	f4/80	Unkn-03	4	28.9581	28.9057	29.4057	28.4057	9.41337	-0.956629	1.94077
	B03	f4/80	Unkn-03	4	29.2624	28.8796
	C03	f4/80	Unkn-03	4	28.4968	28.9057
	A04	f4/80	Unkn-04	5	35.0519	34.5781	35.0781	34.0781	12.348	1.97795	0.25385
	B04	f4/80	Unkn-04	5	34.062	34.5781
	C04	f4/80	Unkn-04	5	34.6205	34.5781
	retina-vehicle	GAPDH	Std-17	1	20.7676	20.8516	0.196128		20.8516	21.3516	20.3516
	retina-vehicle	GAPDH	Std-17	1	20.7114	20.8516	0.196128
	retina-vehicle	GAPDH	Std-17	1	21.0757	20.8516	0.196128
	retina bx471-r	GAPDH	Std-18	2	21.6954	21.6737	0.0946409		21.6737	22.1737	21.1737
	retina bx471-r	GAPDH	Std-18	2	21.7555	21.6737	0.0946409
	retina bx471-r	GAPDH	Std-18	2	21.57	21.6737	0.0946409
	retina cyclo-r	GAPDH	Std-19	4	19.3647	19.4662	0.327417		19.4662	19.9662	18.9662
	retina cyclo-r	GAPDH	Std-19	4	19.2015	19.4662	0.327417
	retina cyclo-r	GAPDH	Std-19	4	19.8323	19.4662	0.327417
	retina bx471	GAPDH	Std-20	5	22.1949	22.2302	0.104373		22.2302	22.7302	21.7302
	retina bx471	GAPDH	Std-20	5	22.148	22.2302	0.104373
	retina bx471	GAPDH	Std-20	5	22.3476	22.2302	0.104373

## Sheet: qPCR ccr1
	Well	Fluor	Target	Content	Sample	Biological Set Name	Cq	Cq Mean	Cq Std. Dev	Starting Quantity (SQ)	Log Starting Quantity	SQ Mean	SQ Std. Dev	Set Point	Well Note
						Cт mean	(+0.5)	(-0.5)	ΔCт	ΔΔCT	2^(-ΔΔCT)
	D01	mCCR1	Unkn-05	1	34.4942	33.942	34.442	33.442	13.0904	0.0904143	0.939253
	E01	mCCR1	Unkn-05	1	33.7912	33.942
	F01	mCCR1	Unkn-05	1	33.5405	33.942
	D02	mCCR1	Unkn-06	2	34.1186	34.2788	34.7788	33.7788	12.6051	-0.394863	1.31482
	E02	mCCR1	Unkn-06	2	34.664	34.2788
	F02	mCCR1	Unkn-06	2	34.0538	34.2788
	D03	mCCR1	Unkn-07	4	31.9342	31.8862	32.3862	31.3862	12.42	-0.580029	1.49488
	E03	mCCR1	Unkn-07	4	32.0328	31.8862
	F03	mCCR1	Unkn-07	4	31.6914	31.8862
	D04	mCCR1	Unkn-08	5	36.6214	36.6214	37.1214	36.1214	14.3912	1.39123	0.381241
	Std-17	gapdh		1	20.7676	20.8516	retina-vehicle	20.8516
	Std-17	gapdh		1	20.7114	20.8516	retina-vehicle									vehicle	bx471
	Std-17	gapdh		1	21.0757	20.8516	retina-vehicle									0.939253	0.381241
	Std-18	gapdh		2	21.6954	21.6737	retina bx471-r	21.6737								1.49488	1.31482
	Std-18	gapdh		2	21.7555	21.6737	retina bx471-r									2.01366	0.74174
	Std-18	gapdh		2	21.57	21.6737	retina bx471-r									2.06093	0.49981		Legend
	Std-19	gapdh		4	19.3647	19.4662	retina cyclo-r	19.4662								0.824217	0.410876
	Std-19	gapdh		4	19.2015	19.4662	retina cyclo-r									0.657721	0.171258
	Std-19	gapdh		4	19.8323	19.4662	retina cyclo-r
	Std-20	gapdh		5	22.1949	22.2302	retina bx471	22.2302								vehicle	bx471
	Std-20	gapdh		5	22.148	22.2302	retina bx471						average	#DIV/0!	#DIV/0!	1.33178	0.586624
	Std-20	gapdh		5	22.3476	22.2302	retina bx471						stdv	#DIV/0!	#DIV/0!	0.614697	0.401861
													sem	#DIV/0!	#DIV/0!	0.274901	0.179718
						Cт mean	(+0.5)	(-0.5)	ΔCт	ΔΔCT	2^(-ΔΔCT)
	A03	mCCR1	Unkn-03	3		0	36.6692	35.6692	14.2832	1.28322	0.410876
	B03	mCCR1	Unkn-03	3	36.8838	36.1692
	C03	mCCR1	Unkn-03	3	35.4545	36.1692
	A04	mCCR1	Unkn-04	4	34.6931	35.7257	36.2257	35.2257	15.5458	2.54576	0.171258
	B04	mCCR1	Unkn-04	4	35.7688	35.3815
	C04	mCCR1	Unkn-04	4	35.6825	35.3815
	A05	mCCR1	Unkn-05	5	33.0555	33.254	33.754	32.754	11.9902	-1.00982	2.01366			60
	B05	mCCR1	Unkn-05	5	34.4669	33.6583								60
	C05	mCCR1	Unkn-05	5	33.4526	33.6583								60
	A06	mCCR1	Unkn-06	6	36.7641	36.8812	37.3812	36.3812	14.0005	1.00055	0.49981			60
	B06	mCCR1	Unkn-06	6	36.5176	36.8812								60
	C06	mCCR1	Unkn-06	6	37.3619	36.8812								60
	A07	mCCR1	Unkn-07	7		0	0.5	-0.5	-24.4023	-37.4023				60
	B07	mCCR1	Unkn-07	7		0								60
	C07	mCCR1	Unkn-07	7	40.7018	40.7018								60
	A08	mCCR1	Unkn-08	8	32.8204	33.8961	34.3961	33.3961	13.6045	0.604451	0.657721			60
	B08	mCCR1	Unkn-08	8	34.1549	33.5376								60
	C08	mCCR1	Unkn-08	8	33.6373	33.5376								60
	A09	mCCR1	Unkn-09	9	31.0531	31.2448	31.7448	30.7448	11.9567	-1.04329	2.06093			60
	B09	mCCR1	Unkn-09	9	31.2486	31.2448								60
	C09	mCCR1	Unkn-09	9	31.4328	31.2448								60
	A10	mCCR1	Unkn-10	10	33.0578	32.7079	33.2079	32.2079	13.431	0.431014	0.74174			60
	B10	mCCR1	Unkn-10	10	32.7201	32.7079								60
	C10	mCCR1	Unkn-10	10	32.3459	32.7079
	A11	mCCR1	Unkn-11	11	32.6458	32.4476	32.9476	31.9476	13.2789	0.278904	0.824217
	B11	mCCR1	Unkn-11	11	32.2495	32.4476
	C11	mCCR1	Unkn-11	11		0
	BX S.C 3 ASSAY
	SYBR	GAPDH	Std-09	1	21.9336	21.8871
	SYBR	GAPDH	Std-09	1	21.7573	21.8871
	SYBR	GAPDH	Std-09	1	21.9704	21.8871
	SYBR	GAPDH	Std-10	2	22.1777	22.1164
	SYBR	GAPDH	Std-10	2	22.0446	22.1164
	SYBR	GAPDH	Std-10	2	22.1271	22.1164
	SYBR	GAPDH	Std-11	3	22.077	21.886
	SYBR	GAPDH	Std-11	3	21.7357	21.886
	SYBR	GAPDH	Std-11	3	21.8451	21.886
	SYBR	GAPDH	Std-12	4	20.2478	20.1799
	SYBR	GAPDH	Std-12	4	20.0697	20.1799
	SYBR	GAPDH	Std-12	4	20.2221	20.1799
	SYBR	GAPDH	Std-13	5	21.362	21.2638
	SYBR	GAPDH	Std-13	5	21.2474	21.2638
	SYBR	GAPDH	Std-13	5	21.1821	21.2638
	SYBR	GAPDH	Std-14	6	23.0028	22.8807
	SYBR	GAPDH	Std-14	6	22.7549	22.8807
	SYBR	GAPDH	Std-14	6	22.8843	22.8807
	SYBR	GAPDH	Std-15	7	24.5181	24.4023
	SYBR	GAPDH	Std-15	7	24.287	24.4023
	SYBR	GAPDH	Std-15	7	24.4018	24.4023
	SYBR	GAPDH	Std-16	8	20.3225	20.2917
	SYBR	GAPDH	Std-16	8	20.2087	20.2917
	SYBR	GAPDH	Std-16	8	20.3439	20.2917
	SYBR	GAPDH	NTC			0
	SYBR	GAPDH	NTC		37.9164	37.9164
	SYBR	GAPDH	Std-19	10	19.3331	19.2769	19.7769	18.7769
	SYBR	GAPDH	Std-19	10	19.1782	19.2769
	SYBR	GAPDH	Std-19	10	19.3195	19.2769
	SYBR	GAPDH	Std-20	11	19.1413	19.1687	19.6687	18.6687
	SYBR	GAPDH	Std-20	11	18.9688	19.1687
	SYBR	GAPDH	Std-20	11	19.3961	19.1687
	SYBR	GAPDH	Std-18	9	19.3461	19.2881	19.7881	18.7881
	SYBR	GAPDH	Std-18	9	19.1608	19.2881
	SYBR	GAPDH	Std-18	9	19.3575	19.2881
H07
H08
D10
E10
F10
D11
E11
F11
D09
E09
F09

## Sheet: qPCR ccl2
	Well	Fluor	Target	Content	Sample	Biological Set Name	Cq	Cq Mean	Cq Std. Dev	Starting Quantity (SQ)	Log Starting Quantity	SQ Mean	SQ Std. Dev	Set Point	Well Note
	H01	SYBR	ccl2	NTC
	H02	SYBR	ccl2	NTC
	H04	SYBR	GAPDH	NTC
	H05	SYBR	GAPDH	NTC
	D01	SYBR	GAPDH	Std-09	1		21.9336	21.8871	22.3871	21.3871
	E01	SYBR	GAPDH	Std-09	1		21.7573	21.8871
	F01	SYBR	GAPDH	Std-09	1		21.9704	21.8871
	D02	SYBR	GAPDH	Std-10	2		22.1777	22.1164	22.6164	21.6164
	E02	SYBR	GAPDH	Std-10	2		22.0446	22.1164
	F02	SYBR	GAPDH	Std-10	2		22.1271	22.1164
	D03	SYBR	GAPDH	Std-11	3		22.077	21.886	22.386	21.386
	E03	SYBR	GAPDH	Std-11	3		21.7357	21.886
	F03	SYBR	GAPDH	Std-11	3		21.8451	21.886
	D04	SYBR	GAPDH	Std-12	4		20.2478	20.1799	20.6799	19.6799
	E04	SYBR	GAPDH	Std-12	4		20.0697	20.1799
	F04	SYBR	GAPDH	Std-12	4		20.2221	20.1799
	D05	SYBR	GAPDH	Std-13	5		21.362	21.2638	21.7638	20.7638
	E05	SYBR	GAPDH	Std-13	5		21.2474	21.2638
	F05	SYBR	GAPDH	Std-13	5		21.1821	21.2638
	D06	SYBR	GAPDH	Std-14	6		23.0028	22.8807	23.3807	22.3807
	E06	SYBR	GAPDH	Std-14	6		22.7549	22.8807
	F06	SYBR	GAPDH	Std-14	6		22.8843	22.8807
	D07	SYBR	GAPDH	Std-15	7		24.5181	24.4023	24.9023	23.9023
	E07	SYBR	GAPDH	Std-15	7		24.287	24.4023
	F07	SYBR	GAPDH	Std-15	7		24.4018	24.4023
	D08	SYBR	GAPDH	Std-16	8		20.3225	20.2917	20.7917	19.7917
	E08	SYBR	GAPDH	Std-16	8		20.2087	20.2917
	F08	SYBR	GAPDH	Std-16	8		20.3439	20.2917															Legend
																			vehicle	bx471	control mice
								Cт mean	(+0.5)	(-0.5)	ΔCт	ΔΔCT	2^(-ΔΔCT)						0.992745		1.07923
	A01	SYBR	ccl2	Unkn-01	1		31.1691	31.1088	31.6088	30.6088	9.2217	2.2217	0.214388			bx1			2.94754	0.0803033	0.0986837
	B01	SYBR	ccl2	Unkn-01	1		30.9454	31.1088											3.86803	0.214388	0.0351084
	C01	SYBR	ccl2	Unkn-01	1		31.2119	31.1088											0.979261	0.384412	0.0347281
	A02	SYBR	ccl2	Unkn-02	2		30.9105	30.4957	30.9957	29.9957	8.37927	1.37927	0.384412			bx2			0.490554	0.22036	0.0126371
	B02	SYBR	ccl2	Unkn-02	2		30.2379	30.4957											3.29803	0.224909	0.00266793
	C02	SYBR	ccl2	Unkn-02	2		30.3387	30.4957											vehicle	bx471	control mice
	A03	SYBR	ccl2	Unkn-03	3		31.3879	31.068	31.568	30.568	9.18207	2.18207	0.22036			bx1-1		average	2.09603	0.224875	0.210509
	B03	SYBR	ccl2	Unkn-03	3		31.1457	31.068										stdv	1.43887	0.1078	0.426895
	C03	SYBR	ccl2	Unkn-03	3		30.6705	31.068										sem	0.587418	0.0440092	0.161351
	A04	SYBR	ccl2	Unkn-04	4		29.5158	29.3325	29.8325	28.8325	9.15259	2.15259	0.224909			bx2-1
	B04	SYBR	ccl2	Unkn-04	4		29.4231	29.3325
	C04	SYBR	ccl2	Unkn-04	4		29.0585	29.3325
	A05	SYBR	ccl2	Unkn-05	5		26.4072	26.3122	26.8122	25.8122	5.0484	-1.9516	3.86803			vh1
	B05	SYBR	ccl2	Unkn-05	5		26.4812	26.3122
	C05	SYBR	ccl2	Unkn-05	5		26.0483	26.3122
	A06	SYBR	ccl2	Unkn-06	6		29.7813	29.9109	30.4109	29.4109	7.03024	0.0302353	0.979261			vh2
	B06	SYBR	ccl2	Unkn-06	6		30.2182	29.9109
	C06	SYBR	ccl2	Unkn-06	6		29.7332	29.9109
	A07	SYBR	ccl2	Unkn-07	7		32.7729	32.4298	32.9298	31.9298	8.02752	1.02752	0.490554			vh1-1
	B07	SYBR	ccl2	Unkn-07	7		32.2988	32.4298
	C07	SYBR	ccl2	Unkn-07	7		32.2177	32.4298
	A08	SYBR	ccl2	Unkn-08	8		25.6722	25.5701	26.0701	25.0701	5.2784	-1.7216	3.29803			vh2-1
	B08	SYBR	ccl2	Unkn-08	8		25.5583	25.5701
	C08	SYBR	ccl2	Unkn-08	8		25.4797	25.5701
										Cт mean	(+0.5)	(-0.5)	ΔCт	ΔΔCT	2^(-ΔΔCT)
		A05	SYBR	ccl2	Unkn-09	retina-vehicle	1	27.7877	27.8621	27.8621	28.3621	27.3621	7.0105	0.0105048	0.992745
		B05	SYBR	ccl2	Unkn-09	retina-vehicle	1	27.9871	27.8621
		C05	SYBR	ccl2	Unkn-09	retina-vehicle	1	27.8115	27.8621
		A06	SYBR	ccl2	Unkn-10	retina bx471-r	2	32.5573	32.3121	32.3121	32.8121	31.8121	10.6384	3.6384	0.0803033
		B06	SYBR	ccl2	Unkn-10	retina bx471-r	2	32.3193	32.3121
		C06	SYBR	ccl2	Unkn-10	retina bx471-r	2	32.0595	32.3121
		A07	SYBR	ccl2	Unkn-11	retina cyclo-r	4	25.0582	24.9067	24.9067	25.4067	24.4067	5.44049	-1.55951	2.94754
		B07	SYBR	ccl2	Unkn-11	retina cyclo-r	4	24.8201	24.9067
		C07	SYBR	ccl2	Unkn-11	retina cyclo-r	4	24.8417	24.9067
		A08	SYBR	ccl2	Unkn-12	retina bx471	5	39.1692	37.8092	37.8092	38.3092	37.3092	15.5791	8.57908	0.00261481
		B08	SYBR	ccl2	Unkn-12	retina bx471	5	39.8117	37.8092
		C08	SYBR	ccl2	Unkn-12	retina bx471	5	34.4468	37.8092
		A09	SYBR	GAPDH	Std-17	retina-vehicle	1	20.7676	20.8516	20.8516	21.3516	20.3516
		B09	SYBR	GAPDH	Std-17	retina-vehicle	1	20.7114	20.8516
		C09	SYBR	GAPDH	Std-17	retina-vehicle	1	21.0757	20.8516
		A10	SYBR	GAPDH	Std-18	retina bx471-r	2	21.6954	21.6737	21.6737	22.1737	21.1737
		B10	SYBR	GAPDH	Std-18	retina bx471-r	2	21.7555	21.6737
		C10	SYBR	GAPDH	Std-18	retina bx471-r	2	21.57	21.6737
		A11	SYBR	GAPDH	Std-19	retina cyclo-r	4	19.3647	19.4662	19.4662	19.9662	18.9662
		B11	SYBR	GAPDH	Std-19	retina cyclo-r	4	19.2015	19.4662
		C11	SYBR	GAPDH	Std-19	retina cyclo-r	4	19.8323	19.4662
		A12	SYBR	GAPDH	Std-20	retina bx471	5	22.1949	22.2302	22.2302	22.7302	21.7302
		B12	SYBR	GAPDH	Std-20	retina bx471	5	22.148	22.2302
		C12	SYBR	GAPDH	Std-20	retina bx471	5	22.3476	22.2302
							(+0.5)	(-0.5)	Cт mean	ΔCт	ΔΔCT	2^(-ΔΔCT)
			ccl2	Unkn-17	5	24.7035	25.1268	24.1268	24.6268	6.89	-0.110002	1.07923
			ccl2	Unkn-17	5	24.5181
			ccl2	Unkn-17	5	24.6587
			ccl2	Unkn-18	6	28.4339	29.119	28.119	28.619	10.341	3.34104	0.0986837
			ccl2	Unkn-18	6	28.3105			28.3722
			ccl2	Unkn-18	6	29.1127
			ccl2	Unkn-19	7	31.1521	31.8371	30.8371	31.3371	11.832	4.83204	0.0351084
			ccl2	Unkn-19	7	31.6761
			ccl2	Unkn-19	7	31.183
			ccl2	Unkn-20	8	31.0999	31.3337	30.3337	30.8337	11.8478	4.84775	0.0347281
			ccl2	Unkn-20	8	30.7773
			ccl2	Unkn-20	8	30.624
			ccl2	Unkn-21	9	32.8439	33.192	32.192	32.692	13.3062	6.3062	0.0126371
			ccl2	Unkn-21	9	32.5416
			ccl2	Unkn-21	9	32.6904
			ccl2	Unkn-22	10	33.1875	34.2556	33.2556	33.7556	15.5501	8.55006	0.00266793
			ccl2	Unkn-22	10	33.7255
			ccl2	Unkn-22	10	34.3538
	H04	SYBR
	D01	SYBR	gapdh	Unkn-09	5		17.7827	17.7368
	E01	SYBR	gapdh	Unkn-09	5		17.616	17.7368
	F01	SYBR	gapdh	Unkn-09	5		17.8117	17.7368
	D02	SYBR	gapdh	Unkn-10	6		18.334	18.278
	E02	SYBR	gapdh	Unkn-10	6		18.2144	18.278
	F02	SYBR	gapdh	Unkn-10	6		18.2855	18.278
	D03	SYBR	gapdh	Unkn-11	7		19.7106	19.5051
	E03	SYBR	gapdh	Unkn-11	7		19.335	19.5051
	F03	SYBR	gapdh	Unkn-11	7		19.4695	19.5051
	D04	SYBR	gapdh	Unkn-12	8		19.1185	18.986
	E04	SYBR	gapdh	Unkn-12	8		18.8645	18.986
	F04	SYBR	gapdh	Unkn-12	8		18.9748	18.986
	D05	SYBR	gapdh	Unkn-13	9		19.5683	19.3858
	E05	SYBR	gapdh	Unkn-13	9		19.297	19.3858
	F05	SYBR	gapdh	Unkn-13	9		19.292	19.3858
	D06	SYBR		Unkn-14	10		18.4583	18.2055
	E06	SYBR		Unkn-14	10		18.0586	18.2055
	F06	SYBR		Unkn-14	10		18.0997	18.2055

## Sheet: qPCR cxcl1 and cxcl10
	Well	Fluor	Target
								Cт mean	(+0.5)	(-0.5)	ΔCт	ΔΔCT	2^(-ΔΔCT)									CXCL1
	H01	SYBR	cxcl1	NTC				0															VEHICLE	BX471	CONTROL
	H02	SYBR	cxcl1	NTC				0															1.81524	1.00191	0.557412
	A01	SYBR	cxcl1	Unkn-01	1		30.1483	30.1743	30.6743	29.6743	8.28724	-0.0027588	1.00191										2.84418	1.9319	0.0124618
	B01	SYBR	cxcl1	Unkn-01	1		30.1782	30.1743															0.930616	0.849592	0.0117046
	C01	SYBR	cxcl1	Unkn-01	1		30.1965	30.1743															0.370952	0.110256	0.01292
	A02	SYBR	cxcl1	Unkn-02	2		29.6954	29.4564	29.9564	28.9564	7.33998	-0.950017	1.9319										1.60974	0.12436	0.00923135
	B02	SYBR	cxcl1	Unkn-02	2		29.4482	29.4564															1.33112	0.629299	0.0115193
	C02	SYBR	cxcl1	Unkn-02	2		29.2257	29.4564
	A03	SYBR	cxcl1	Unkn-03	3		30.3914	30.4111	30.9111	29.9111	8.52516	0.235157	0.849592										VEHICLE	BX471	control
	B03	SYBR	cxcl1	Unkn-03	3		30.3415	30.4111														AVERAGE	1.48364	0.774553	0.102541
	C03	SYBR	cxcl1	Unkn-03	3		30.5004	30.4111														STDV	0.841913	0.67556	0.222844
	A04	SYBR	cxcl1	Unkn-04	4		31.6136	31.651	32.151	31.151	11.4711	3.18107	0.110256									SEM	0.343709	0.275796	0.0909755
	B04	SYBR	cxcl1	Unkn-04	4		31.6847	31.651														ERROR	2.12567	3.16747
	C04	SYBR	cxcl1	Unkn-04	4		31.6546	31.651														EROR	-0.576567	-0.200186
	A05	SYBR	cxcl1	Unkn-05	5		28.6661	28.6937	29.1937	28.1937	7.42984	-0.860158	1.81524
	B05	SYBR	cxcl1	Unkn-05	5		28.9124	28.6937
	C05	SYBR	cxcl1	Unkn-05	5		28.5025	28.6937
	A06	SYBR	cxcl1	Unkn-06	6		29.5139	29.6627	30.1627	29.1627	6.78199	-1.50801	2.84418
	B06	SYBR	cxcl1	Unkn-06	6		29.9373	29.6627
	C06	SYBR	cxcl1	Unkn-06	6		29.5369	29.6627
	A07	SYBR	cxcl1	Unkn-07	7		33.1333	32.796	33.296	32.296	8.39374	0.103742	0.930616
	B07	SYBR	cxcl1	Unkn-07	7		32.692	32.796
	C07	SYBR	cxcl1	Unkn-07	7		32.5628	32.796
	A08	SYBR	cxcl1	Unkn-08	8		30.0837	30.0124	30.5124	29.5124	9.7207	1.4307	0.370952
	B08	SYBR	cxcl1	Unkn-08	8		30.3091	30.0124
	C08	SYBR	cxcl1	Unkn-08	8		29.6443	30.0124
	H04	SYBR	cxcl10	NTC				0														CXCL10
	H05	SYBR	cxcl10	NTC				0															Vehicle	Bx471	CONTROL
	D01	SYBR	cxcl10	Unkn-09	1		30.2977	30.3192	30.8192	29.8192	8.43211	0.0421105	0.971233										0.99614	0.229569	0.00495023			Legend
	E01	SYBR	cxcl10	Unkn-09	1		30.2416	30.3192															1.13631	0.0852911	0.0411321
	F01	SYBR	cxcl10	Unkn-09	1		30.4184	30.3192															0.290468	0.971233	0.0143398
	D02	SYBR	cxcl10	Unkn-10	2		31.1362	31.1389	31.6389	30.6389	9.02245	0.632455	0.645078										2.32965	0.645078	0.0171158
	E02	SYBR	cxcl10	Unkn-10	2		31.056	31.1389															5.08056	0.976272	0.0292786
	F02	SYBR	cxcl10	Unkn-10	2		31.2245	31.1389															0.865529	0.140452	0.0210195
	D03	SYBR	cxcl10	Unkn-11	3		30.3474	30.3106	30.8106	29.8106	8.42465	0.0346452	0.976272
	E03	SYBR	cxcl10	Unkn-11	3		30.1406	30.3106
	F03	SYBR	cxcl10	Unkn-11	3		30.4438	30.3106
	D04	SYBR	cxcl10	Unkn-12	4		31.2567	31.4018	31.9018	30.9018	11.2219	2.83185	0.140452
	E04	SYBR	cxcl10	Unkn-12	4		31.2658	31.4018															Vehicle	Bx471	control mice
	F04	SYBR	cxcl10	Unkn-12	4		31.6827	31.4018														AVERAGE	1.78311	0.507982	0.021306
	D05	SYBR	cxcl10	Unkn-13	5		31.4767	31.4374	31.9374	30.9374	10.1735	1.78355	0.290468									stdv	1.74811	0.410841	0.0125723
	E05	SYBR	cxcl10	Unkn-13	5		31.3787	31.4374														sem	0.713664	0.167725	0.00513263
	F05	SYBR	cxcl10	Unkn-13	5		31.4567	31.4374														error (+)	5.27933	1.32966	0.0464507
	D06	SYBR	cxcl10	Unkn-14	6		30.17	30.0506	30.5506	29.5506	7.16989	-1.22011	2.32965									error (-)	-1.71312	-0.3137	-0.00383863
	E06	SYBR	cxcl10	Unkn-14	6		29.935	30.0506
	F06	SYBR	cxcl10	Unkn-14	6		30.0467	30.0506
	D07	SYBR	cxcl10	Unkn-15	7		30.6386	30.4473	30.9473	29.9473	6.04501	-2.34499	5.08056
	E07	SYBR	cxcl10	Unkn-15	7		30.219	30.4473
	F07	SYBR	cxcl10	Unkn-15	7		30.4843	30.4473
	D08	SYBR	cxcl10	Unkn-16	8		29.0452	28.89	29.39	28.39	8.59835	0.208346	0.865529
	E08	SYBR	cxcl10	Unkn-16	8		28.7749	28.89
	F08	SYBR	cxcl10	Unkn-16	8		28.8501	28.89
		SYBR	GAPDH	Std-09	1	21.9336	21.8871
		SYBR	GAPDH	Std-09	1	21.7573	21.8871
		SYBR	GAPDH	Std-09	1	21.9704	21.8871
		SYBR	GAPDH	Std-10	2	22.1777	22.1164
		SYBR	GAPDH	Std-10	2	22.0446	22.1164
		SYBR	GAPDH	Std-10	2	22.1271	22.1164
		SYBR	GAPDH	Std-11	3	22.077	21.886
		SYBR	GAPDH	Std-11	3	21.7357	21.886
		SYBR	GAPDH	Std-11	3	21.8451	21.886
		SYBR	GAPDH	Std-12	4	20.2478	20.1799
		SYBR	GAPDH	Std-12	4	20.0697	20.1799
		SYBR	GAPDH	Std-12	4	20.2221	20.1799
		SYBR	GAPDH	Std-13	5	21.362	21.2638
		SYBR	GAPDH	Std-13	5	21.2474	21.2638
		SYBR	GAPDH	Std-13	5	21.1821	21.2638
		SYBR	GAPDH	Std-14	6	23.0028	22.8807
		SYBR	GAPDH	Std-14	6	22.7549	22.8807
		SYBR	GAPDH	Std-14	6	22.8843	22.8807
		SYBR	GAPDH	Std-15	7	24.5181	24.4023
		SYBR	GAPDH	Std-15	7	24.287	24.4023
		SYBR	GAPDH	Std-15	7	24.4018	24.4023
		SYBR	GAPDH	Std-16	8	20.3225	20.2917
		SYBR	GAPDH	Std-16	8	20.2087	20.2917
		SYBR	GAPDH	Std-16	8	20.3439	20.2917
									Cт mean	(+0.5)	(-0.5)	ΔCт	ΔΔCT	2^(-ΔΔCT)
			cxcl1	Unkn-01	retina-vehicle	1	28.4527		28.4547	28.9547	27.9547	7.60317	-0.686826	1.60974
			cxcl1	Unkn-01		1	28.6117
			cxcl1	Unkn-01		1	28.2998
			cxcl1	Unkn-02	retina bx471-r	2	30.6438		30.6318	31.1318	30.1318	8.95818	0.668183	0.629299
			cxcl1	Unkn-02		2	30.5758
			cxcl1	Unkn-02		2	30.676
			cxcl1	Unkn-03	retina cyclo-r	3	28.0668		27.5846	28.0846	27.0846	7.87736	-0.412639	1.33112
			cxcl1	Unkn-03		3	27.4402		27.3435
			cxcl1	Unkn-03		3	27.2469
			cxcl1	Unkn-04	retina bx471	4	34.5736		33.8763	34.3763	33.3763	11.2974	3.0074	0.12436
			cxcl1	Unkn-04		4	33.5314		33.5276
			cxcl1	Unkn-04		4	33.5237
									Cт mean	(+0.5)	(-0.5)	ΔCт	ΔΔCT	2^(-ΔΔCT)
	A01	SYBR	cxcl10	Unkn-01	retina-vehicle	1	30.2827	29.5923	29.2472	30.0923	29.0923	8.39558	0.00557991	0.99614
	B01	SYBR	cxcl10	Unkn-01	retina-vehicle	1	29.3522	29.5923
	C01	SYBR	cxcl10	Unkn-01	retina-vehicle	1	29.1421	29.5923
	A02	SYBR	cxcl10	Unkn-02	retina bx471-r	2	35.6699	34.3	33.6151	34.8	33.8	11.9415	3.55146	0.0852911
	B02	SYBR	cxcl10	Unkn-02	retina bx471-r	2	34.2209	34.3
	C02	SYBR	cxcl10	Unkn-02	retina bx471-r	2	33.0094	34.3
	A03	SYBR	cxcl10	Unkn-03	retina cyclo-r	4	28.5312	27.9583	27.6718	28.4583	27.4583	8.20565	-0.184352	1.13631
	B03	SYBR	cxcl10	Unkn-03	retina cyclo-r	4	27.8574	27.9583
	C03	SYBR	cxcl10	Unkn-03	retina cyclo-r	4	27.4862	27.9583
	A04	SYBR	cxcl10	Unkn-04	retina bx471	5	33.0868	32.7432	32.7432	33.2432	32.2432	10.513	2.123	0.229569
	B04	SYBR	cxcl10	Unkn-04	retina bx471	5	32.6821	32.7432
	C04	SYBR	cxcl10	Unkn-04	retina bx471	5	32.4606	32.7432
	A09	SYBR	GAPDH	Std-17	retina-vehicle	1	20.7676	20.8516	20.8516	21.3516	20.3516	0.00157351	0.99891	retina-vehicle
	B09	SYBR	GAPDH	Std-17	retina-vehicle	1	20.7114	20.8516
	C09	SYBR	GAPDH	Std-17	retina-vehicle	1	21.0757	20.8516
	A10	SYBR	GAPDH	Std-18	retina bx471-r	2	21.6954	21.6737	21.6737	22.1737	21.1737	0.823664	0.565005	retina bx471-r
	B10	SYBR	GAPDH	Std-18	retina bx471-r	2	21.7555	21.6737
	C10	SYBR	GAPDH	Std-18	retina bx471-r	2	21.57	21.6737
	A11	SYBR	GAPDH	Std-19	retina cyclo-r	4	19.3647	19.4662	19.4662	19.9662	18.9662	-1.38381	2.60957	retina cyclo-r
	B11	SYBR	GAPDH	Std-19	retina cyclo-r	4	19.2015	19.4662
	C11	SYBR	GAPDH	Std-19	retina cyclo-r	4	19.8323	19.4662
	A12	SYBR	GAPDH	Std-20	retina bx471	5	22.1949	22.2302	22.2302	22.7302	21.7302	1.38016	0.384177	retina bx471
	B12	SYBR	GAPDH	Std-20	retina bx471	5	22.148	22.2302
	C12	SYBR	GAPDH	Std-20	retina bx471	5	22.3476	22.2302
	cxcl1	NTC
	cxcl1	NTC
	control mice					Cт mean	(+0.5)	(-0.5)	ΔCт	ΔΔCT	2^(-ΔΔCT)
	cxcl1	Unkn-05	5	27.0053		26.87	27.37	26.37	9.13319	0.843185	0.557412
	cxcl1	Unkn-05	5	27.0426
	cxcl1	Unkn-05	5	26.562
	cxcl1	Unkn-06	6	33.0371		32.8943	33.3943	32.3943	14.6163	6.32634	0.0124618
	cxcl1	Unkn-06	6	32.9452
	cxcl1	Unkn-06	6	32.7007
	cxcl1	Unkn-07	7	34.1818		34.2118	34.7118	33.7118	14.7068	6.41678	0.0117046
	cxcl1	Unkn-07	7	34.3064
	cxcl1	Unkn-07	7	34.1473
	cxcl1	Unkn-08	8	33.7211		33.5502	34.0502	33.0502	14.5642	6.27424	0.01292
	cxcl1	Unkn-08	8	33.3934
	cxcl1	Unkn-08	8	33.5362
	cxcl1	Unkn-09	9	34.3389		34.435	34.935	33.935	15.0492	6.75924	0.00923135
	cxcl1	Unkn-09	9	34.2116
	cxcl1	Unkn-09	9	34.7546
	cxcl1	Unkn-10	10	31.4535		32.9353	33.4353	32.4353	14.7298	6.4398	0.0115193
	cxcl1	Unkn-10	10	31.5325
	cxcl1	Unkn-10	10	35.82
	cxcl10	NTC		37.9386		Cт mean	(+0.5)	(-0.5)	ΔCт	ΔΔCT	2^(-ΔΔCT)
	cxcl10	Unkn-11	5	30.7214		30.7304	31.2304	30.2304	12.9936	4.60359	0.0411321
	cxcl10	Unkn-11	5	30.4286
	cxcl10	Unkn-11	5	31.0411
	cxcl10	Unkn-12	6	33.1685		32.7918	33.2918	32.2918	14.5138	6.12383	0.0143398
	cxcl10	Unkn-12	6	32.6166
	cxcl10	Unkn-12	6	32.5904
	cxcl10	Unkn-13	7	33.7959		33.7636	34.2636	33.2636	14.2585	5.86852	0.0171158
	cxcl10	Unkn-13	7	33.3613
	cxcl10	Unkn-13	7	34.1336
	cxcl10	Unkn-14	8	32.7603		32.47	32.97	31.97	13.484	5.09401	0.0292786
	cxcl10	Unkn-14	8	32.2677
	cxcl10	Unkn-14	8	32.3819
	cxcl10	Unkn-15	9	33.3857		33.3479	33.8479	32.8479	13.9621	5.57213	0.0210195
	cxcl10	Unkn-15	9	33.29
	cxcl10	Unkn-15	9	33.368
	cxcl10	Unkn-16	10	34.3923		34.2538	34.7538	33.7538	16.0483	7.65829	0.00495023
	cxcl10	Unkn-16	10	34.0243
	cxcl10	Unkn-16	10	34.3449
	H04	SYBR
	D01	SYBR	gapdh	Unkn-09	5		17.7827	17.7368
	E01	SYBR	gapdh	Unkn-09	5		17.616	17.7368
	F01	SYBR	gapdh	Unkn-09	5		17.8117	17.7368
	D02	SYBR	gapdh	Unkn-10	6		18.334	18.278
	E02	SYBR	gapdh	Unkn-10	6		18.2144	18.278
	F02	SYBR	gapdh	Unkn-10	6		18.2855	18.278
	D03	SYBR	gapdh	Unkn-11	7		19.7106	19.5051
	E03	SYBR	gapdh	Unkn-11	7		19.335	19.5051
	F03	SYBR	gapdh	Unkn-11	7		19.4695	19.5051
	D04	SYBR	gapdh	Unkn-12	8		19.1185	18.986
	E04	SYBR	gapdh	Unkn-12	8		18.8645	18.986
	F04	SYBR	gapdh	Unkn-12	8		18.9748	18.986
	D05	SYBR	gapdh	Unkn-13	9		19.5683	19.3858
	E05	SYBR	gapdh	Unkn-13	9		19.297	19.3858
	F05	SYBR	gapdh	Unkn-13	9		19.292	19.3858
	D06	SYBR		Unkn-14	10		18.4583	18.2055
	E06	SYBR		Unkn-14	10		18.0586	18.2055
	F06	SYBR		Unkn-14	10		18.0997	18.2055
