# Supplementary material for: CCR1 mediates Müller cell activation and photoreceptor cell death in macular and retinal degeneration
Source: eLife. 2023 Oct 30;12:e81208. doi: 10.7554/eLife.81208 (PMC10615370; doi:10.7554/eLife.81208)
Supplement: Figure 7—source data 1. — Reactive oxygen species (ROS) levels and migration level measured in M2a hMdɸs groups. [file elife-81208-fig7-data1.xlsx]

## Sheet: ccr1 expression FACS
analysis of 20.2.19		gate 3
	m1	m2a
1	29.57	36.76			Legend
2	33.27	49.22
3	34.46	38.18
4	30.62	31.42
5	30.5	56.67
	m1	m2a
average	31.684	42.45
fold	1.33979
stdv	2.07512	10.2507
sem	1.03756	4.58427

## Sheet: ros assay
patient	IC101377
																		AVERAGE
<>	1	2	3	4	5	6	7	8	9	10	11	12			m2a			45421
A															m2a + 10 ug CCR1 ab			41246.3
B	2216	2280	35014	50295	50954	2262	2192	2241	2236	2332	2226	2276			m2a +25 ug BX471
C	2275	2262	2243	2267	2266	2142	2177	2301	2279	2247	2288	2280
D	2283	2212	37134	45328	41277	2224	4831	4424	4466	2212	2283	2243
E
F
G
H
patient	no name
<>	1	2	3	4	5	6	7	8	9	10	11	12													M2a	m2a+0.5 uM BX471	m2a +5uM BX471
A																		AVERAGE	% of Reduction						49190.5				Legend
B	3239	3090	50495	47886	6008	17027	17722	32258	3014	3089	3104				m2a			49190.5							38355	27171	26969
C	3119	3066	21227	20679	17580	2945	3085	2977	3047	3053	3020				m2a + 10 ug CCR1 ab			22335.7	54.5935	0.454065					39015	30313.3	30334.7
D	3155	3109	2993	3067	3015	3001	2993	3059	2936	3017	3086				m2a +50 uM BX471			19828.7	59.69	0.4031					32407	30383	34321.7
E																									35915.3	33832	27776.3
F																									42709
G
H
																								fold change		0.23167	0.246176
																								% of reduction		0.23167	0.246176
																									M2A	m2a+0.5 uM BX471	m2a +5uM BX471
																								AVERAGE	39598.6	30424.8	29850.4
																								STDV	5811.23	2720.93	3308.12
																								ERROR+	51221.1	35866.7	36466.7
																								error -	27976.2	24983	23234.2
																								sem	2196.44	1360.47	1654.06
6.2.18	PATIENT:	IC101380
<>	1	2	3	4	5	6	7	8	9	10
A																		AVERAGE	% of Reduction	RATIO	FOLD CHANGE
B	2575	2623	2590	2636	2636	2621	2529	2519	2576	2608					m2a			38355
C	2663	2640	33390	49697	31978	2632	44201	30604	26603	2597					m2a + 10 ug CCR1 ab			33802.7	11.8689	0.881311	0.118689
D	2632	2580	2642	2554	2557	2590	2512	2620	2670	2645					m2a +5M BX471			26969	29.6858	0.703142	0.296858
E	2659	2546	27231	32232	21444	2463	27498	38055	15960	2659					m2a+0.5 uM BX471			27171	29.1592	0.708408	0.291592
F	2693	2637	2601	2657	2626	2563	2663	2649	2551	2638
G
H
14.2.18	patient:ic100381
<>	1	2	3	4	5	6	7	8	9	10
A
B																		average
C	1184	1195	1123	1133	1110	1133	1125	1122	38444	30459	23162	1180			m0
D	1166	1159	1211	1201	1155	33987	47674	35384	1142	1137	1149	1135			m2a without DEFCDA				% of Reduction	RATIO	FOLD CHANGE
E	1173	1142	1147	1147	1115	1112	1114	1133	1115	1116	1118	1174
F	1142	36950	33185	32250	1109	28970	29040	28620	1110	1105	1135	1168			m2a			39015
G	1164	1158	1227	1116	1133	1122	1116	1098	1143	1103	1121	1157			m2a + 10 ug CCR1 ab			34128.3	12.5251	0.874749	0.125251
H	1163	38829	28186	23989	1153	30861	27329	32750	1108	1145	1157	1144			m2a + 20 ug CCR1 ab			28876.7	25.9857	0.740143	0.259857
															m2a +5uM BX471			30334.7	22.2487	0.777513	0.222487
															m2a+0.5 uM BX471			30313.3	22.3034	0.776966	0.223034
	900
21.2.18	ic100322
																			% of Reduction	RATIO	FOLD CHANGE
	1806	1785	1756	1768	1739	1748	1776	1790	1726	1734	1851				m2a			32407
	1774	1750	2776	2788	3084	1752	34854	31183	31184	1707	1731				m2a + 10 ug CCR1			39588.7		1.22161
	1751	1747	1763	1741	1806	1689	1704	1747	1702	1704	1800				m2a + 20 ug CCR1			33354.7		1.02924
	1793	1806	40321	32102	46343	1653	36805	32617	30642	1747	1743				m2a +5uM BX471			34321.7		1.05908
	1804	1821	1833	1757	1744	1682	1677	1723	1752	1725	1765				m2a+0.5 uM BX471			30383		0.937544
	1757	1808	34242	34691	34032	1716	27414	36699	27036	1732	1728
20.3.18	ic101																		% of Reduction	RATIO	FOLD CHANGE
	2827	2844	2791	2781	2684	2816	2692	2781	2802	2793	2803	2911			m2a			35915.3
	2819	2778	51696	46783	38593	2660	43217	36202	34980	2765	2793	2863			m2a + 10 ug CCR1 ab			45690.7		1.27218
	2897	2740	2738	2722	2644	2687	2619	2753	2664	2702	2754	2853			m2a + 20 ug CCR1 ab			38133		1.06175
	2851	2820	33560	35200	38986	2621	2781	2646	2668	2689	2712	2870			m2a +5uM BX471			27776.3		0.773384	0.226616
	2842	2890	2962	2660	2735	2640	2771	2711	2715	2735	2691	2874			m2a+0.5 uM BX471			33832		0.941993	0.0580068
	2766	2839	26646	32632	24051	2807	34140	22382	44974	2712	2829	2820
12.2.19	ic101404
	4592	4659	4725	4726	4579	4642	4682	4582	4748	4762	4620	4753			m2a			42709
	4734	49777	43975	34375	4609	44708	36220	36824	4596	34631	35732	34883			m2a + 10 ug CCR1 ab			39250.7
	4645	4662	4650	4520	4642	4638	4663	4607	4554	4770	4663	4666			m2a + 20 ug CCR1 ab			40589	38158
	4609	44144	37112	40511	4419	35139	33884	4698	4629	4796	4898	5295			m2a + 20 ug CCR1			34511.5
	4754	4723	4923	4608	4688	4653	4450	4555	4539	4670	4625	4861
	4698	4982	4741	4994	4689	33835	35466	34682	4549	33402	34521	34288
	4207	4191	4253	4112	4121	4134	4322	4259	4230	4331	4236	4232
	4149	50334	41626	35122	4165	43597	36615	38027	4112	30625	31091	29810
	4196	4327	4181	4166	4117	4068	4145	4168	4074	4135	4149	4321
	4238	43729	38274	41082	4181	35325	34316	4204	4052	4318	4405	4608
	4272	4233	4382	4292	4165	4044	4093	4172	4103	4296	4245	4206
	4357	4368	4320	4257	4224	29844	31420	30795	4164	29369	29885	30205

## Sheet: migration assay
	monocyte	monocyte +10uM bx471	m2a+monocyte	m2a+monocyte +10 µM bx471
	14400	11361	24935	19716		Legend
	11091	14621	24579	17769
	17673	16048	22711	21545
	Without M2a hMdɸ	Without M2a hMdɸ +10 µm CCR1 inhibitor	M2a hMdɸ	M2a hMdɸ + 10 µM CCR1 inhibitor
average	14388	14010	24075	19676.7
stdv	3291.02	2402.5	1194.59	1888.31
sem	1900.07	1387.08	689.699	1090.21
fold change	1.67327		1.22353
error(+)	20970	18815	26464.2	23453.3
error(-)	7805.97	9205.01	21685.8	15900.1
