# Supplementary material for: CCR1 mediates Müller cell activation and photoreceptor cell death in macular and retinal degeneration
Source: eLife. 2023 Oct 30;12:e81208. doi: 10.7554/eLife.81208 (PMC10615370; doi:10.7554/eLife.81208)
Supplement: Supplementary file 1. [file elife-81208-supp1.xlsx]

## Sheet: גיליון1
Table 3. Cytokines array result
Protein name		M1:M2a ratio		P-value		Protein name		M1:M2a ratio		P-value		Protein name		M1:M2a ratio		P-value
CXCL13 (O43927)		75.1438		0.00255575		AREG (P15514)		not detected				CCL21 ( O00585)		0.805083		0.640411
CCL11 (P51671)		0.887665		0.548074		BDNF ( P23560)		0.454515		0.559935		Axl (P30530)		2.33234		0.22272
CCL24 (O00175)		0.535679		0.015		bFGF ( P09038)		not detected				BTC ( P35070)		0.90985		0.29491
CSF3 (P09919)		25.0616		0.0558239		BMP-4 ( P12644)		0.410952		0.46335		CCL28 ( Q9NRJ3)		0.639846		0.141805
CSF2 (P04141)		0.896457		0.34879		BMP-5 (P22003)		not detected				CCL27 (Q9Y4X3)		1.06956		0.773598
CCL1 (P22362)		1.86238		0.0218911		BMP-7 ( P18075)		0.437551		0.574461		CXCL16 (Q9H2A7)		1.05233		0.459975
ICAM-1 ( P05362)		1.33525		0.47688		b-NGF (P01138)		not detected				CXCL5 ( P42830)		1.10576		0.408613
IFNg ( P01579)		1.87052		0.123819		EGF (P01133)		0.319586		0.0895742		CCL26 (Q9Y258)		0.800115		0.135236
IL-1a ( P01583)		0.912734		0.362653		EGF R ( P00533)		not detected				CXCL6(P80162)		2.72503		0.0571653
IL-1b (P01584)		2.52853		0.121595		EG-VEGF (P58294)		not detected				CXCL1 ( P09341/P19875/P19876)		1.1458		0.281339
IL-1ra ( P18510)		0.930744		0.443778		FGF-4 (P08620)		0.0345111		0.313183		CCL14 (Q16627)		0.110828		0.0009
IL-2 ( P60568)		0.991455		0.913595		FGF-7 ( P21781)		not detected				CCL16 ( O15467)		0.82193		0.180099
IL-4 ( P05112)		0.0109897		3.21868e-05		GDF-15 (Q99988)		0.561608		0.286038		IL-9 (P15248)		0.707216		0.112242
IL-5 (P05113)		1.21317		0.246384		GDNF ( P39905)		not detected				IL-17F ( Q96PD4)		0.483759		0.232082
IL-6 (P05231)		14.4025		1.83573e-05		GH ( P01241)		not detected				IL-18 Bpa ( O95998)		0.763238		0.233748
IL-6sR (P08887)		0.677045		0.235251		HB-EGF ( Q99075)		not detected				IL-28A ( Q8IZJ0)		0.344639		0.0776685
IL-7 (P13232)		0.760079		0.0298084		HGF ( P14210)		0.27644		0.0807815		IL-29 ( Q8IU54)		0.633584		0.069513
IL-8 (P10145)		0.844904		0.255607		IGFBP-1 ( P08833)		not detected				IL-31 ( Q6EBC2)		1.06424		0.869435
IL-10 (P22301)		2.78644		0.0210226		IGFBP-2 (P18065)		0.164213		0.100682		CXCL10 (P02778)		2.21596		0.0008
IL-11 (P20809)		1.21305		0.0505873		IGFBP-3 ( P17936)		not detected				CXCL11 (O14625)		11.4317		0.0002
IL-12p40 (P29460)		58.3077		0.0641501		IGFBP-4 ( P22692)		not detected				LIF ( P15018)		1.25761		0.433619
IL-12p70 ( P29459)		1.38982		0.133216		IGFBP-6 ( P24592)		not detected				TNFSF14 (O43557)		0.976973		0.814862
IL-13 ( P35225)		0.00595595		2.40785e-05		IGF-I ( P05019)		0.973065		0.929336		XCL1 (P47992)		0.872153		0.798208
IL-15 (P40933)		0.918993		0.398662		Insulin (P01308)		0.169114		0.149305		CCL8 (P80075)		1.15746		0.143551
IL-16 ( Q14005)		1.18004		0.359942		MCSF R (P07333)		1.20032		0.507969		CCL7 (P80098)		1.38494		0.001
IL-17 (Q16552)		1.05301		0.352658		NGF R ( P08138)		not detected				CCL13 (Q99616)		0.104492		0.0001
CCL2 ( P13500)		1.09224		0.273027		NT-3 (P20783)		not detected				CCL22 (O00626)		0.871407		0.543851
CSF1 ( P09603)		1.95184		0.0491651		NT-4 ( P34130)		0		0.0948396		MIF ( P14174)		1.11246		0.51262
CXCL9 (Q07325)		1.38034		0.352199		OPG (O00300)		not detected				CCL20 (P78556)		5.73495		0.0008
CCL3 (P10147)		1.10425		0.103805		PDGF-AA (P04085)		0.811148		0.415529		CCL19 (Q99731)		11.0365		0.0002
CCL4 (P13236)		1.02789		0.802884		PLGF (P49763)		0.415522		0.0878628		CCL23 (O00175)		0.460588		0.009
CCL15 ( Q16663)		0.818131		0.225789		SCF (P21583)		not detected				MST1 ( P26927)		1.29311		0.474611
PDGFB (P01127)		0.647753		0.0409062		SCF R ( P10721)		not detected				PPBP(P02775)		1.18469		0.528033
CCL5 (P13501)		3.31536		0.003		TGFa (P01135)		0		0.0122512		SPP1 (P10451)		1.44522		0.0926518
TIMP-1 (P01033)		1.05158		0.38513		TGFb (P01137)		1.61873		0.656783		CCL18 ( P55774)		0.792454		0.351372
TIMP-2 ( P16035)		0.821589		0.329956		TGFb3 (P10600)		not detected				PF4 ( P02776)		1.54836		0.0654444
TNFa (P01375)		2.73978		0.267281		VEGF-a (P15692)		4.74254		0.0108328		CXCL12 (P48061)		1.97007		0.002
TNFb (P01374)		0.791558		0.0287239		VEGF R2 (P35968)		not detected				CCL17 (Q92583)		0.264015		0.002
TNF RI ( P19438)		0.883779		0.726513		VEGF R3 ( P35916)		not detected				CCL25 ( O15444)		1.03119		0.82964
TNF RII (P20333)		1.45028		0.082687		VEGF-D (O43915)		not detected				TSLP (Q969D9)		1.38099		0.0814951
